# Supplementary material for: Stabilizing microbial communities by looped mass transfer
Source: PubMed Central journal article supplement — Proc Natl Acad Sci U S A. 2022 Apr 21;119(17):e2117814119. doi: 10.1073/pnas.2117814119 (PMC9169928; doi:10.1073/pnas.2117814119), 2022-04-21
Supplement: pnas.2117814119.sapp.pdf [file pnas.2117814119.sapp.pdf]

1 Supplementary Information

2

3

**Stabilizing microbial communities by looped mass transfer**

4

5 Shuang Li<sup>a</sup>, Nafi'u Abdulkadir<sup>a</sup>, Florian Schattenberg<sup>a</sup>, Ulisses Nunes da Rocha<sup>a</sup>, Volker

6 Grimm<sup>b,c</sup>, Susann Müller<sup>a\*</sup> and Zishu Liu<sup>d</sup>

7

8 <sup>a</sup>Helmholtz Centre for Environmental Research-UFZ, Department of Environmental Microbiology,  
9 Permoserstr. 15, 04318 Leipzig, Germany.

10 <sup>b</sup>Helmholtz Centre for Environmental Research-UFZ, Department of Ecological Modelling,  
11 Permoserstr. 15, 04318 Leipzig, Germany.

12 <sup>c</sup>University of Potsdam, Plant Ecology and Nature Conservation, Am Mühlenberg 3, 14476  
13 Potsdam, Germany

14 <sup>d</sup>College of Environmental and Resource Sciences, Zhejiang University, 866 Yuhangtang Rd,  
15 Hangzhou 310058, China

16

17

18

19

20

21

22

23

24

25

26

27

28

29

30

31

32

|    |                                                                                                                    |    |
|----|--------------------------------------------------------------------------------------------------------------------|----|
| 33 | <b>Content</b>                                                                                                     |    |
| 34 | S1: Bioreactor setup .....                                                                                         | 4  |
| 35 | S2: Experimental setup .....                                                                                       | 4  |
| 36 | S3: Analysis and calculation of functional parameters .....                                                        | 6  |
| 37 | Effects of mass transfer on the universal functions of wastewater communities .....                                | 9  |
| 38 | Function 1: CODs removal by the local communities L1-L5, the regional pool R, and the                              |    |
| 39 | metacommunity.....                                                                                                 | 10 |
| 40 | Function 2: NH <sub>4</sub> removal by the local communities L1-L5, the regional pool R, and the                   |    |
| 41 | metacommunity.....                                                                                                 | 13 |
| 42 | Function 3: PHOt removal by the local communities L1-L5, the regional pool R, and the                              |    |
| 43 | metacommunity.....                                                                                                 | 15 |
| 44 | S4: Flow cytometric analysis of community structure .....                                                          | 18 |
| 45 | Preparation of cell samples .....                                                                                  | 18 |
| 46 | Step 1: Cell sample fixation.....                                                                                  | 18 |
| 47 | Step 2: DNA staining with DAPI .....                                                                               | 19 |
| 48 | Cytometric analysis .....                                                                                          | 19 |
| 49 | Step 1: Instrumental setup .....                                                                                   | 19 |
| 50 | Step 2: Measuring community samples.....                                                                           | 20 |
| 51 | Step 3: Creation of the gate-template to determine the community structure .....                                   | 20 |
| 52 | Step 4: Cell sorting.....                                                                                          | 21 |
| 53 | S5: Cell counting by flow cytometry.....                                                                           | 22 |
| 54 | Preparation of cells for the determination of cell numbers.....                                                    | 22 |
| 55 | Step 1: Cell sample dilution.....                                                                                  | 22 |
| 56 | Step 2: DNA staining with SYTO <sup>®</sup> 9 .....                                                                | 22 |
| 57 | Counting cell numbers.....                                                                                         | 22 |
| 58 | Step 1: Instrumental setup .....                                                                                   | 22 |
| 59 | Step 2: Determination of total cell number.....                                                                    | 22 |
| 60 | S6: DNA extraction and 16S rRNA gene amplicon sequencing.....                                                      | 24 |
| 61 | Step 1: DNA extraction.....                                                                                        | 24 |
| 62 | Step 2: DNA quality testing and library preparation for Illumina MiSeq sequencing.....                             | 24 |
| 63 | Step 3: Processing of raw sequencing data, denoising and selection of 16S rRNA gene                                |    |
| 64 | amplicon sequencing variants .....                                                                                 | 25 |
| 65 | Step 4: Taxonomic classification .....                                                                             | 26 |
| 66 | Step 5: Removing contaminants and setting relative abundance thresholds based on positive                          |    |
| 67 | and negative controls.....                                                                                         | 26 |
| 68 | Step 6: Visualization of the amplicon sequencing data.....                                                         | 28 |
| 69 | S7: Stability of communities under the influence of RC <sub>10</sub> , RC <sub>50</sub> and RC <sub>80</sub> ..... | 28 |

|     |                                                                                                         |    |
|-----|---------------------------------------------------------------------------------------------------------|----|
| 70  | Step 1: Constancy spaces for determining changes in microbial community composition                     |    |
| 71  | caused by increasing $RC$ .....                                                                         | 28 |
| 72  | Step 2: Resistance $RS$ and recovery $RV$ for determining changes in microbial community                |    |
| 73  | composition caused by increasing $RC$ .....                                                             | 29 |
| 74  | S8: Analysis of microbial community composition .....                                                   | 30 |
| 75  | Step 1: Visualization of microbial community composition.....                                           | 30 |
| 76  | Step 2: Comparison of effluents between local communities L1-L5 and the regional pool R                 |    |
| 77  | .....                                                                                                   | 35 |
| 78  | Step 3: $\alpha$ -, $\gamma$ - and $\beta$ -diversity values of microbial communities L1-L5 and R ..... | 35 |
| 79  | Step 4: Partitioning of $\beta$ -diversity to reveal turnover and nestedness of SCs.....                | 38 |
| 80  | S9: Taxonomic composition of whole communities and sorted SCs.....                                      | 41 |
| 81  | Step 1: Taxonomic composition of communities.....                                                       | 41 |
| 82  | Step 2: Taxonomic assignment of sorted SCs.....                                                         | 46 |
| 83  | S10: Calculation of the net growth rate $\mu'$ .....                                                    | 51 |
| 84  | Calculation of the recycling rate $RC$ .....                                                            | 52 |
| 85  | Relationship between net growth rate $\mu'$ and mass transfer rate $M$ .....                            | 53 |
| 86  | Produced cell numbers in local communities L1-L5 .....                                                  | 55 |
| 87  | S11: Quantification of the net growth rate per subcommunity $\mu'_{SCx}$ .....                          | 56 |
| 88  | Calculation of $\mu'_{SCx}$ on the basis of experimental data .....                                     | 58 |
| 89  | S12: Effect of the recycling rate $RC$ on the presence of SC .....                                      | 60 |
| 90  | S13: Relationship between biotic and abiotic parameters .....                                           | 62 |
| 91  | S14: Assessment of the proportions of deterministic and stochastic processes during mass                |    |
| 92  | transfer .....                                                                                          | 64 |
| 93  | Normalized Stochasticity Ratio (NST) analysis .....                                                     | 65 |
| 94  | Quantifying assembly processes based on Entire-community Null model analysis (QPEN)...                  | 66 |
| 95  | Infer Community Assembly Mechanisms by Phylogenetic-Bin-Based Null Model Analysis                       |    |
| 96  | (iCAMP).....                                                                                            | 69 |
| 97  | References .....                                                                                        | 71 |
| 98  |                                                                                                         |    |
| 99  |                                                                                                         |    |
| 100 |                                                                                                         |    |
| 101 |                                                                                                         |    |
| 102 |                                                                                                         |    |
| 103 |                                                                                                         |    |
| 104 |                                                                                                         |    |
| 105 |                                                                                                         |    |
| 106 |                                                                                                         |    |
| 107 |                                                                                                         |    |

## 108 S1: Bioreactor setup

109 The bioreactors were constructed and handled as described previously (1). In short, a microbial  
110 community from an activated sludge basin of a wastewater treatment plant (Eilenburg, Saxonia,  
111 Germany, 51°27'39.4"N, 12°36'17.5"E) was pre-cultivated in a medium mixture of peptone  
112 medium and synthetic wastewater [v:v = 2%:98%; 0.198 g L<sup>-1</sup> peptone (from meat), 0.2 g L<sup>-1</sup> meat  
113 extract, 0.219 g L<sup>-1</sup> yeast extract, 0.1 g L<sup>-1</sup> glucose, 0.49 g L<sup>-1</sup> Na-propionate (filtered), 0.0059 g  
114 L<sup>-1</sup> CaCl<sub>2</sub>·2H<sub>2</sub>O, 0.0294 g L<sup>-1</sup> KCl, 0.06 g L<sup>-1</sup> NaCl, 0.04 g L<sup>-1</sup> K<sub>2</sub>HPO<sub>4</sub>, 0.2156 g L<sup>-1</sup> KH<sub>2</sub>PO<sub>4</sub> and  
115 0.0196 g L<sup>-1</sup> MgSO<sub>4</sub>·7H<sub>2</sub>O; chemicals were purchased from: Merck KGaA (Darmstadt, Germany),  
116 SERVA Electrophoresis GmbH (Heidelberg, Germany) and Carl Roth GmbH (Karlsruhe,  
117 Germany)]. This pre-cultivation was started by mixing 10 mL thawed activated sludge samples  
118 (from frozen aliquots) with 100 mL medium mixture in a 500 mL Erlenmeyer flask, and the  
119 cultivation was carried out on a rotary shaker at 125 rpm and 30°C for 24 h (Incubator Hood TH  
120 25; Edmund Bühler GmbH, Hechingen, Germany). Five bioreactors were then setup in parallel  
121 and the same volume of the preculture was used for inoculation for each 1 L bioreactor filled with  
122 the medium mixture to a final volume of 800 mL (initial OD<sub>600, d=5mm</sub> = 0.057 ± 0.003). Effluents of  
123 each of the five reactors were collected by a sixth bioreactor, and this reactor was operated in  
124 exactly the same way as the other five reactors, only without the addition of fresh medium (Fig.  
125 1).

126 All six connected reactors were run at 27°C (thermostat with Incubator Hood TH 25) and 350 rpm  
127 using a multipoint magnetic stirrer (Thermo Electron LED GmbH, Langenselbold, Germany) and  
128 stirrer bars (45 × 8 mm, Labsolute®; Th. Geyer GmbH, Renningen, Germany), and at an aeration  
129 rate of 150 mL min<sup>-1</sup> with compressed sterile filtered ambient air controlled by a rotor gas  
130 flowmeter (six measuring channels; Analyt-MTC GmbH, Müllheim, Germany). The fluidic system  
131 of the bioreactors was controlled through a set of microprocessor-controlled dispensing pumps  
132 IPC-N 12 (Ismatec®; Cole-Parmer GmbH, Wertheim, Germany), and the continuously running  
133 mode was maintained over time.

134

135

## 136 S2: Experimental setup

137 The local communities L1-L5 and the regional pool R together formed a metacommunity (Fig.  
138 S2.1). The rates of effluents and influents among the local communities L1-L5 and also for the  
139 regional pool R were controlled manually. The flow rate of the total influent (medium plus recycling  
140 flow) into each of the local communities L1-L5 was set at a constant 0.4 mL min<sup>-1</sup>, a dilution rate

141 of  $0.72 \text{ d}^{-1}$  and a hydraulic retention time of 33.3 h. The setup for the regional pool R differed from  
142 that of local communities L1-L5. The influent of the regional pool R was the sum of effluents from  
143 the five local communities L1-L5 without additional nutrients. This setup caused a fivefold higher  
144 dilution rate than for the local communities. Owing to  $5D$  (i.e.,  $3.6 \text{ d}^{-1}$ ), the cells entered and left  
145 the regional pool R at a fivefold higher rate than for the five local communities L1-L5.  
146 The six reactors were run for 110 days. The days were sub-grouped into five phases according  
147 to increasing recycling flow rates (Table S2.1). The first phase was the Insular I phase, in which  
148 no exchange with the other reactors was allowed. The reactor serving as the regional pool R was  
149 run as a sink for local community effluents starting at day 9, which were not recycled back to the  
150 local communities L1-L5. The second phase  $RC_{10}$  (i.e. recycling rate  $RC$  10%) started at day 26  
151 in which the regional pool R and the local communities L1-L5 were interconnected. The third  
152 phase  $RC_{50}$  (i.e. recycling rate  $RC$  50%) was started at day 47 and the fourth phase  $RC_{80}$  (i.e.  
153 recycling rate  $RC$  80%) at day 64. In phases 2-4, the inflow from the regional pool R, increasing  
154 from 0.04, 0.2 and  $0.32 \text{ mL min}^{-1}$ , was compensated for by decreasing the amounts of medium.  
155 Therefore, the medium flow rates were lowered to 0.36, 0.2 and  $0.08 \text{ mL min}^{-1}$  (Table S2.1). To  
156 maintain the nutrient load rate for the local communities L1-L5 under the recycling flow rate  
157 conditions, the nutrients in the medium were concentrated 1.1 times, 2 times and 5 times,  
158 accordingly. In the fifth Insular II phase starting at day 89, all recycling from the regional pool R to  
159 local communities L1-L5 was stopped and conditions returned back to how they were in the first  
160 phase. Within each of the five phases, the first 7 days were defined as an adaptation period in  
161 which the medium volume of the reactors was exchanged five times. Afterwards, balanced growth  
162 conditions were assumed. A total of 448 samples were collected from the six bioreactors in 110  
163 days, with 76 samples from each of the local communities L1-L5 and 68 samples from the regional  
164 pool R. The number of samples, recycling flow rate settings and time intervals per phase are  
165 summarized in Table S2.1.  
166

167 **Table S2.1** Summary of sample numbers, recycling rate (*RC*) setting and time intervals per phase

| phase            | number of samples per reactor | medium flow rate (mL min <sup>-1</sup> ) | recycling flow rate (mL min <sup>-1</sup> ) | medium factor | adaptation period (d) | balanced period (d) |
|------------------|-------------------------------|------------------------------------------|---------------------------------------------|---------------|-----------------------|---------------------|
| Insular I        | 18 (10 for R)                 | 0.4                                      | 0                                           | 1             | 0-8                   | 8-26                |
| RC <sub>10</sub> | 14                            | 0.36                                     | 0.04                                        | 1.1           | 26-33                 | 33-47               |
| RC <sub>50</sub> | 13                            | 0.2                                      | 0.2                                         | 2             | 47-54                 | 54-64               |
| RC <sub>80</sub> | 15                            | 0.08                                     | 0.32                                        | 5             | 64-71                 | 71-89               |
| Insular II       | 16                            | 0.4                                      | 0                                           | 1             | 89-96                 | 96-110              |

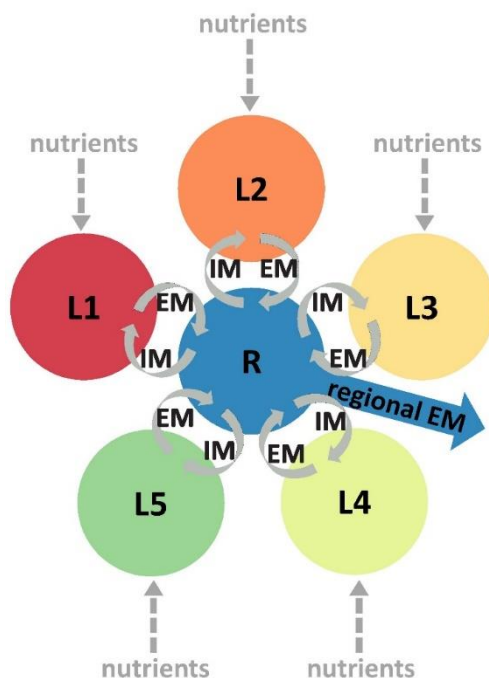

168  
 169 **Figure S2.1** Conceptual setup of the metacommunity investigated in this study. Local communities L1-L5  
 170 assembled in identical localities, and all were connected to a community in the regional pool R. Microbial  
 171 immigration (IM) and emigration (EM) of local communities occurred between each of the local communities  
 172 and the regional pool R. In addition, cells were emigrated via the regional pool R.

173  
 174

### 175 **S3: Analysis and calculation of functional parameters**

176 For each sample, 7 mL of cell culture was taken, of which 0.2 mL was used for counting total cell  
 177 number (CN), 1 mL for DNA extraction (centrifuged at 21,000×g for 10 min and 4°C, and pellet  
 178 stored at -20°C), and 5.8 mL for the measurements of optical density (OD), pH and electrical  
 179 conductivity (EC), as well as for the flow cytometric analysis of the cells. In addition, 5 mL was  
 180 collected two to five times a week per reactor to analyze the chemical oxygen demand of the  
 181 supernatant (COD<sub>s</sub>) and of the total sample (COD<sub>t</sub>), ammonium-nitrogen (NH<sub>4</sub>, supernatant) and

182 total phosphate, calculated as phosphor (PHOt, total sample). The dry weight (DW) was  
183 measured once a week using a 20 mL sample.

184 The optical density ( $OD_{600, d=5 \text{ mm}}$ , Ultraspec 1100pro; Amersham Biosciences, Little Chalfont, UK),  
185 pH (EL 20; Mettler-Toledo, Greifensee, Switzerland) and electrical conductivity (EC, inolab  
186 Cond7110; WTW, Germany) were measured daily in all reactors. Additionally, COD, NH<sub>4</sub> and  
187 PHOt were measured daily in the first 7 days (i.e., adaptation period) and once every 3 or 4 days  
188 during the balanced period per phase. CODs and CODt (DIN ISO 15705:2002) and NH<sub>4</sub> (DIN  
189 38406-E5) were analyzed with NANOCOLOR® test tubes (Macherey-Nagel GmbH, Düren,  
190 Germany) following the manufacturer's instructions. CODb (chemical oxygen demand of biomass)  
191 was calculated by subtracting CODs from CODt. PHOt (phosphate) was measured by  
192 phosphomolybdate blue spectrophotometry. Briefly, after a pre-heating treatment (120°C, 30 min),  
193 500 µL diluted supernatant was treated with 800 µL reagent [stock solution: 125 mL H<sub>2</sub>O, 25 mL  
194 9N H<sub>2</sub>SO<sub>4</sub>, 25 mL Mo<sub>7</sub>O<sub>24</sub><sup>-6</sup> solution (1.65 g (NH<sub>4</sub>)<sub>6</sub>Mo<sub>7</sub>O<sub>24</sub>·4H<sub>2</sub>O in 25 mL H<sub>2</sub>O), and 25 mL Fe (II)  
195 solution (3.89 g (NH<sub>4</sub>)<sub>2</sub>Fe(SO<sub>4</sub>)<sub>2</sub>·6H<sub>2</sub>O in 25 mL H<sub>2</sub>O)] for 10 minutes. The dry weight (DW) of the  
196 biomass was measured once a week during the balanced growth conditions of each phase. Briefly,  
197 the cell solution was centrifuged at 5,000×g for 10 min at 4°C (Centrifuge 5804R; Eppendorf,  
198 Hamburg, Germany). The supernatant was discarded and the residual pellet was transferred to a  
199 2 mL tube and centrifuged at 20,000×g for 10 min at 4°C (Heraeus Fresco 21 centrifuge; Thermo  
200 Scientific, Langenselbold, Germany). Finally, the pellet was dried at 50°C for 4 days. In addition  
201 to CODb and DW, biomass was also evaluated by counting the total number of cells mL<sup>-1</sup> (CN)  
202 by flow cytometry (Supplementary Information S5). All other supernatants measured in this study  
203 were obtained by centrifuging the samples at 3,200×g for 10 min and 4°C. The OD, pH, EC and  
204 PHOt measurements were performed in triplicate, while COD and NH<sub>4</sub> were measured in  
205 duplicates. A graphical overview of all parameters is shown in Fig. S3.1. All data of the parameters  
206 are listed in Dataset S1.

207



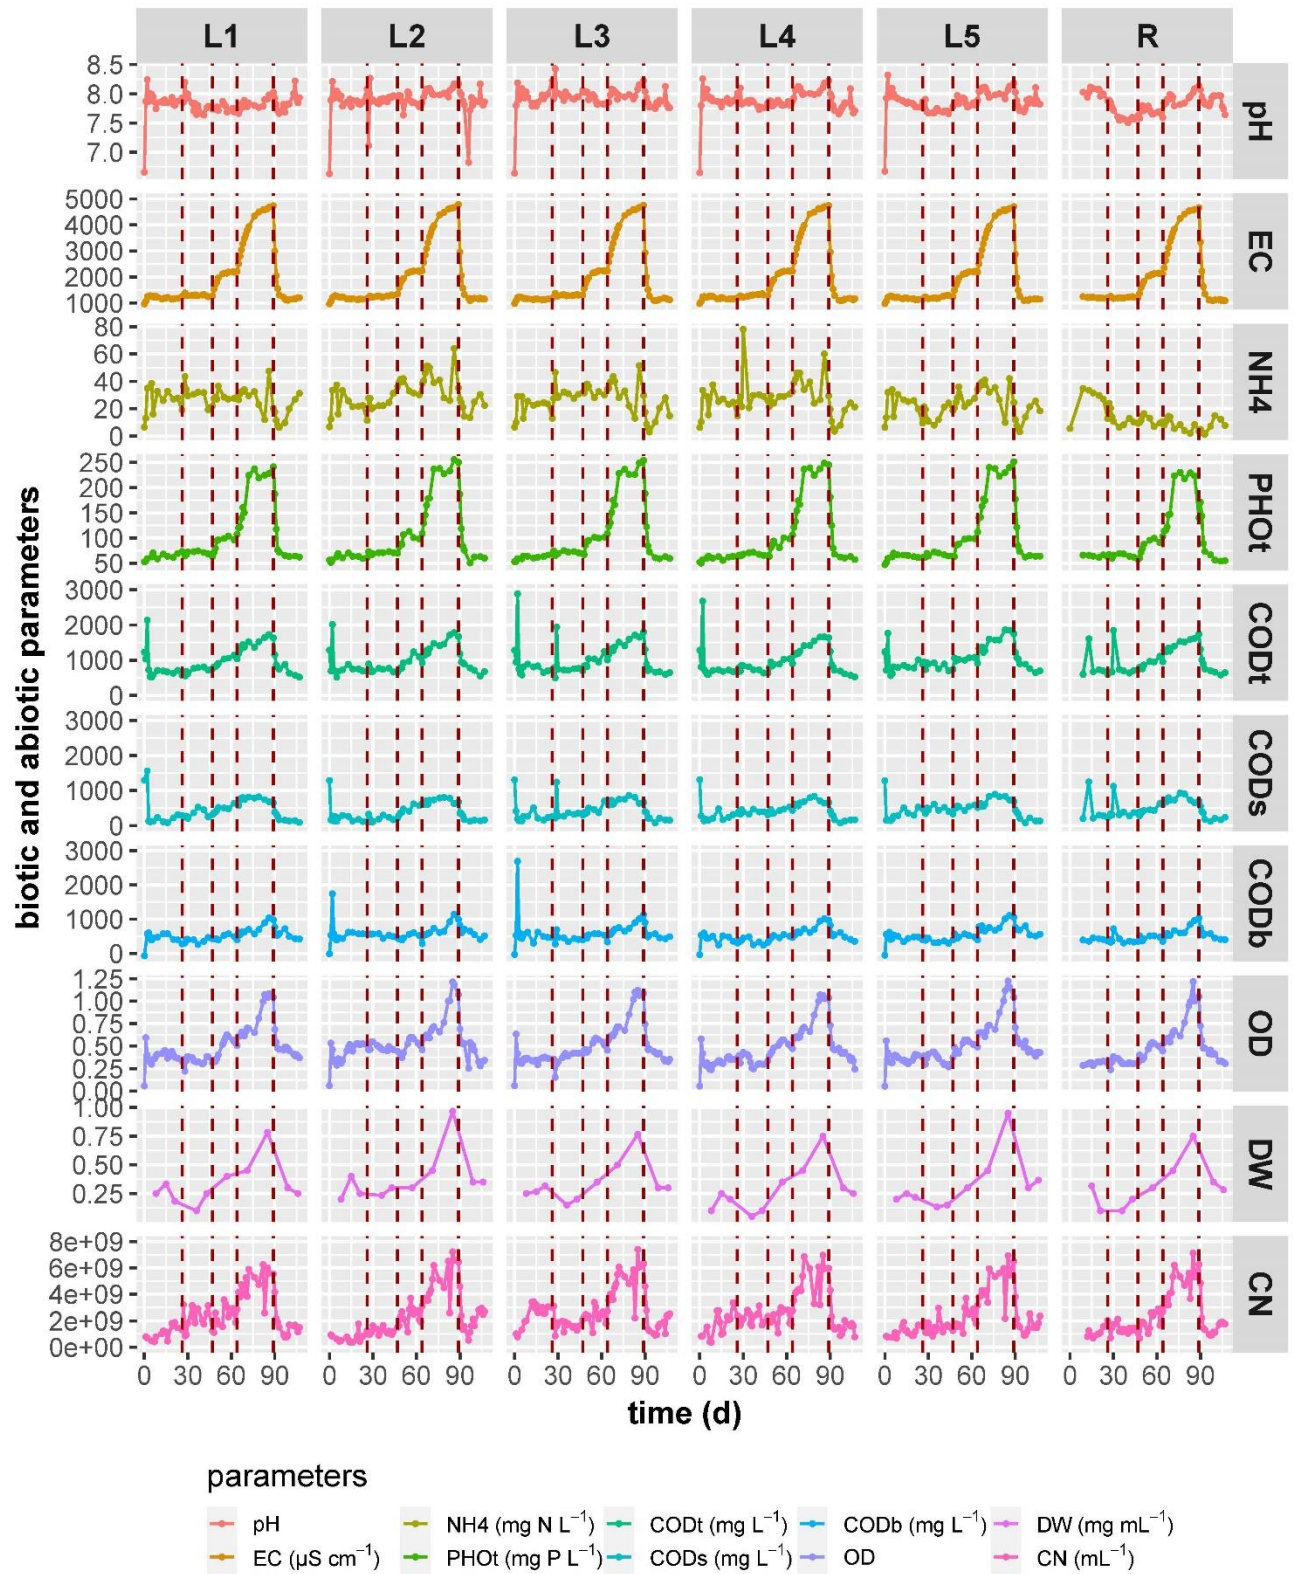

208  
209

210 **Figure S3.1** Overview of the bulk biotic and abiotic parameters measured for the local communities L1-L5  
211 and the regional pool R. Parameters were pH, EC (electrical conductivity,  $\mu\text{S cm}^{-1}$ ), NH4 (ammonium, mg



212 N L<sup>-1</sup>), PHOt (phosphate of total sample, mg P L<sup>-1</sup>), CODt (chemical oxygen demand of total sample, mg L<sup>-1</sup>),  
213 CODs (chemical oxygen demand of supernatant, mg L<sup>-1</sup>), CODb (chemical oxygen demand of biomass,  
214 mg L<sup>-1</sup>), OD<sub>600, d=5mm</sub> (optical density), DW (dry weight, g L<sup>-1</sup>) and CN (cell number, mL<sup>-1</sup>). The dashed red  
215 lines indicate the times at which the next phase begins.

216

217 With the increase of RC<sub>10</sub> to RC<sub>80</sub> the values for the abiotic parameter EC and phosphate also  
218 increased, while the values for ammonium and pH remained constant in local communities L1-L5.  
219 The biotic parameter showed increased values for biomass (CODb, OD, dry weight and cell  
220 number; comparisons between successive phases, Wilcoxon test:  $p \leq 0.01$ ). The regional pool  
221 R showed similar trends, with the exception of ammonium, which decreased. In all reactors, the  
222 highest biomass values were found in RC<sub>80</sub> and the lowest in Insular I phase and Insular II phase  
223 (Fig. S3.1, Dataset S1).

224

### 225 [Effects of mass transfer on the universal functions of wastewater communities](#)

226 Wastewater communities have the function to remove carbon, nitrogen and phosphorus from the  
227 wastewater. Carbon is taken up into biomass or degraded to CO<sub>2</sub>. Ammonium-nitrogen is  
228 originating from the destruction of biomass (especially from proteins: amino-acids) and is removed  
229 mainly via nitrification and denitrification. Phosphorus is released during anaerobic conditions and  
230 by cell destruction into the wastewater and can be removed by biomass production and  
231 accumulation as polyphosphates in the biomass under mainly aerobic conditions. Produced  
232 biomass is finally taken out from the wastewater treatment process as biosolids which are finally  
233 either burned or used for other purposes. In this study removal of carbon is measured by various  
234 COD values, the removal of nitrogen by NH<sub>4</sub> values and the removal of phosphorus as PHOt  
235 values. To evaluate the influences of mass transfer on these functional parameters, we  
236 summarized the measured values as average  $\pm$  standard deviations per balanced period per  
237 phase and per reactor, which are shown in Table S3.1. Due to the looped mass transfer, medium  
238 and biomass recycled between local communities L1-L5 and the regional pool R (Supplementary  
239 Information S2) with increasing mass transfer rates in phases 2, 3 and 4. The average NH<sub>4</sub> values  
240 in the wastewater supernatant remained roughly unchanged while CODs values and PHOt values  
241 of the total biomass increased with mass transfer rates. The increase in total biomass (CN: cell  
242 number; CODb: carbon bound in biomass) also increased with mass transfer rates.

243

244 **Table S3.1** Average values of changes in CODs (chemical oxygen demand of the supernatant), CODb  
245 (chemical oxygen demand of biomass), NH<sub>4</sub> (ammonium-nitrogen in supernatant), PHOt (total phosphate)

246 CN (cell number) and DW (dry weight) per local communities L1-L5 and regional pool R, determined for the  
 247 balanced period per phase. The CODs, NH<sub>4</sub>, and PHOt values for the medium are also given.

| phase            | reactor | CODs (mg L <sup>-1</sup> ) | CODb (mg L <sup>-1</sup> ) | NH <sub>4</sub> (mg N L <sup>-1</sup> ) | PHOt (mg P L <sup>-1</sup> ) | CN (×10 <sup>9</sup> L <sup>-1</sup> ) | DW (mg L <sup>-1</sup> ) |
|------------------|---------|----------------------------|----------------------------|-----------------------------------------|------------------------------|----------------------------------------|--------------------------|
| Insular I        | L1      | 192.0 ± 92.1               | 489.4 ± 86.9               | 29.3 ± 3.3                              | 64.5 ± 4.5                   | 1.3 ± 0.4                              | 258.3 ± 106.1            |
|                  | L2      | 196.2 ± 78.2               | 566.2 ± 74.8               | 24.9 ± 5.0                              | 63.6 ± 4.2                   | 0.7 ± 0.4                              | 325.0 ± 106.1            |
|                  | L3      | 274.7 ± 136.7              | 503.5 ± 132.0              | 23.9 ± 1.1                              | 63.3 ± 2.2                   | 2.9 ± 0.4                              | 291.7 ± 35.4             |
|                  | L4      | 280.5 ± 123.9              | 423.3 ± 115.6              | 27.6 ± 5.7                              | 61.1 ± 3.3                   | 2.0 ± 0.9                              | 225.0 ± 35.4             |
|                  | L5      | 395.2 ± 118.1              | 452.0 ± 64.5               | 25.6 ± 3.9                              | 64.6 ± 2.2                   | 1.2 ± 0.4                              | 233.3 ± 23.6             |
| RC <sub>10</sub> | L1      | 399.5 ± 118.1              | 372.8 ± 85.6               | 28.4 ± 6.1                              | 72.0 ± 2.5                   | 2.5 ± 0.5                              | 175.0 ± 106.1            |
|                  | L2      | 223.0 ± 57.8               | 513.8 ± 58.8               | 25.1 ± 4.3                              | 71.7 ± 1.0                   | 1.2 ± 0.2                              | 266.7 ± 47.1             |
|                  | L3      | 328.0 ± 44.9               | 413.0 ± 48.4               | 30.3 ± 2.0                              | 73.0 ± 1.8                   | 1.6 ± 0.3                              | 175.0 ± 35.4             |
|                  | L4      | 395.0 ± 59.7               | 331.8 ± 112.6              | 27.4 ± 4.5                              | 69.1 ± 2.8                   | 2.3 ± 0.5                              | 75.0 ± 35.4              |
|                  | L5      | 493.5 ± 94.9               | 326.3 ± 30.2               | 16.4 ± 7.6                              | 68.6 ± 3.6                   | 1.5 ± 0.6                              | 141.7 ± 11.8             |
|                  | R       | 335.0 ± 51.8               | 360.0 ± 51.7               | 9.5 ± 2.8                               | 66.1 ± 3.5                   | 1.4 ± 0.3                              | 150.0 ± 70.7             |
| RC <sub>50</sub> | L1      | 541.3 ± 86.3               | 535.3 ± 42.7               | 27.7 ± 0.8                              | 99.9 ± 3.8                   | 2.6 ± 0.7                              | 400.0                    |
|                  | L2      | 534.0 ± 110.5              | 566.7 ± 42.1               | 31.5 ± 1.5                              | 104.2 ± 8.1                  | 2.5 ± 0.8                              | 300.0                    |
|                  | L3      | 509.7 ± 175.3              | 566.0 ± 23.4               | 30.2 ± 2.3                              | 101.1 ± 1.2                  | 2.4 ± 0.7                              | 350.0                    |
|                  | L4      | 478.0 ± 52.5               | 508.3 ± 49.1               | 29.5 ± 0.9                              | 93.3 ± 10.9                  | 2.3 ± 0.7                              | 350.0                    |
|                  | L5      | 521.5 ± 85.0               | 527.5 ± 45.0               | 24.5 ± 3.0                              | 98.7 ± 0.9                   | 2.5 ± 0.8                              | 300.0                    |
|                  | R       | 502.7 ± 107.2              | 505.7 ± 20.5               | 9.8 ± 3.0                               | 95.5 ± 4.3                   | 2.1 ± 0.7                              | 300.0                    |
| RC <sub>80</sub> | L1      | 768.5 ± 57.7               | 783.9 ± 185.8              | 28.9 ± 13.0                             | 226.6 ± 6.7                  | 5.0 ± 1.3                              | 783.3                    |
|                  | L2      | 748.0 ± 70.9               | 815.2 ± 222.8              | 39.6 ± 15.1                             | 238.0 ± 10.6                 | 5.5 ± 1.5                              | 966.7                    |
|                  | L3      | 762.0 ± 84.0               | 810.8 ± 145.5              | 29.5 ± 14.4                             | 233.0 ± 9.8                  | 5.4 ± 1.5                              | 766.7                    |
|                  | L4      | 733.0 ± 82.2               | 802.2 ± 172.6              | 36.8 ± 14.3                             | 237.1 ± 8.9                  | 5.5 ± 1.5                              | 750.0                    |
|                  | L5      | 826.0 ± 57.7               | 862.0 ± 190.4              | 29.2 ± 12.1                             | 233.9 ± 7.7                  | 5.1 ± 1.6                              | 950.0                    |
|                  | R       | 788.0 ± 122.7              | 739.0 ± 163.4              | 5.7 ± 2.8                               | 224.6 ± 5.1                  | 5.4 ± 1.0                              | 750.0                    |
| Insular II       | L1      | 327.3 ± 274.3              | 428.2 ± 268.4              | 21.6 ± 12.6                             | 84.2 ± 75.3                  | 2.2 ± 1.6                              | 275.0 ± 35.4             |
|                  | L2      | 297.5 ± 265.1              | 474.6 ± 282.4              | 22.9 ± 14.2                             | 86.2 ± 79.6                  | 2.0 ± 1.8                              | 350.0 ± 0                |
|                  | L3      | 331.8 ± 262.9              | 440.3 ± 272.9              | 20.8 ± 12.7                             | 85.0 ± 77.9                  | 2.4 ± 1.7                              | 300.0 ± 0                |
|                  | L4      | 327.7 ± 253.3              | 405.0 ± 267.6              | 22.4 ± 13.8                             | 84.2 ± 79.1                  | 2.3 ± 1.7                              | 275.0 ± 35.4             |
|                  | L5      | 387.8 ± 285.4              | 436.0 ± 295.9              | 18.7 ± 11.2                             | 84.8 ± 78.1                  | 2.0 ± 1.6                              | 333.3 ± 47.1             |
| 1x medium        |         | 1262.1 ± 30.4              | -                          | 6.5 ± 0.2                               | 52.4 ± 3.3                   | -                                      | -                        |

248

249 To reveal how mass transfer affected community functions, the efficiency of CODs removal  
 250 (CODs: Function 1), ammonium-nitrogen removal (NH<sub>4</sub>: Function 2) and phosphate removal  
 251 (PHOt: Function 3) were calculated (see Eq. S3.1- Eq. S3.29).

252

253 **Function 1: CODs removal by the local communities L1-L5, the regional pool R, and the metacommunity**

254 The CODs removal was calculated on the basis of CODs inflow (CODs of the medium feed) and  
 255 the CODs in the effluent. For each phase, the CODs removal efficiency (%) was determined. The  
 256 used terms for the metacommunity are:

257  $COD_{S_{remove}}$  is the CODs removed per minute by microbial communities L1-L5 and R;

258 COD<sub>Sinflow</sub> is the CODs of the medium feed per minute;  
259 COD<sub>Seffluent</sub> is the CODs of the effluent per minute;  
260 5 is the number of local communities L1-L5;  
261 medium flow rate per phase is shown in Table S2.1;  
262 effluent flow rate (5 × medium flow rate) per phase is shown in Fig. 1;  
263 COD<sub>SR</sub> is the average CODs of the regional pool R per each phase shown in Table S3.1;  
264 COD<sub>Smedium</sub> is the carbon content of the medium:  
265 insular phases I & II: ×1 (1,262.1 ± 30.4 mg L<sup>-1</sup>, Table S3.1).  
266 mass transfer RC<sub>10</sub>: ×1.1 (1,388.3 mg L<sup>-1</sup>)  
267 mass transfer RC<sub>50</sub>: ×2 (2,524.2 mg L<sup>-1</sup>)  
268 mass transfer RC<sub>80</sub>: ×5 (6,310.4 mg L<sup>-1</sup>)  
269  
270  $COD_{Sinflow} = 5 \times \text{medium flow rate} \times COD_{Smedium}$  Eq. S3.1  
271  $COD_{Seffluent} = \text{effluent flow rate} \times COD_{SR}$  Eq. S3.2  
272  $COD_{Sremove} = COD_{Sinflow} - COD_{Seffluent}$  Eq. S3.3  
273  $\text{efficiency} = COD_{Sremove} / COD_{Sinflow} \times 100\%$  Eq. S3.4  
274  
275 The used terms for the local communities L1-L5 are:  
276 COD<sub>SLremove</sub> is the CODs removed per minute by each of the microbial communities L1-L5;  
277 COD<sub>SLinflow</sub> is the CODs of the medium feed per minute plus the inflow from the regional pool;  
278 COD<sub>SLeffluent</sub> is the CODs of the effluent per local community per minute;  
279 medium flow rate per phase is shown in Table S2.1;  
280 effluent flow rate is 0.4 mL min<sup>-1</sup>;  
281 recycling flow rate per phase is shown in Table S2.1;  
282 COD<sub>SR</sub> is the average CODs of the regional pool R per each phase shown in Table S3.1;  
283 COD<sub>SL</sub> is the average CODs for each of the local communities per each phase (Table S3.1);  
284 COD<sub>Smedium</sub> is the carbon content of the medium:  
285 insular phases I & II: ×1 (1,262.1 ± 30.4 mg L<sup>-1</sup>, Table S3.1).  
286 mass transfer RC<sub>10</sub>: ×1.1 (1,388.3 mg L<sup>-1</sup>)  
287 mass transfer RC<sub>50</sub>: ×2 (2,524.2 mg L<sup>-1</sup>)  
288 mass transfer RC<sub>80</sub>: ×5 (6,310.4 mg L<sup>-1</sup>)  
289  
290  $COD_{SLinflow} = \text{medium flow rate} \times COD_{Smedium} + \text{recycling flow rate} \times COD_{SR}$  Eq. S3.5  
291  $COD_{SLeffluent} = \text{effluent flow rate} \times COD_{SL}$  Eq. S3.6  
292  $COD_{SLremove} = COD_{SLinflow} - COD_{SLeffluent}$  Eq. S3.7  
293  $\text{efficiency} = COD_{SLremove} / COD_{SLinflow} \times 100\%$  Eq. S3.8  
294

295 The used terms for the regional pool R are:

296  $COD_{SR,remove}$  is the CODs removed by the microbial community of R per minute;

297  $COD_{SR,inflow}$  is the CODs of the sum of the inflow of the local communities L1-L5 per minute;

298  $COD_{SR,effluent}$  is the CODs of the effluent of the regional pool R plus recycled flow to local  
 299 communities L1-L5 per minute;

300 effluent flow rate is  $2.0 \text{ mL min}^{-1}$  which is the sum of the effluent and the recycling flow rate;

301 medium flow rate per phase is shown in Table S2.1;

302 recycling flow rate per phase is shown in Table S2.1;

303  $COD_{SR}$  is the average CODs of the regional pool R per each phase shown in Table S3.1;

304  $COD_{SL1-L5}$  is the sum of CODs of all 5 local communities L1-L5 per each phase (Table S3.1);

305

306  $COD_{SR,inflow} = (\text{medium flow rate} + \text{recycling flow rate}) \times COD_{SL1-L5}$  Eq. S3.9

307  $COD_{SR,effluent} = \text{effluent flow rate} \times COD_{SR}$  Eq. S3.10

308  $COD_{SR,remove} = COD_{SR,inflow} - COD_{SR,effluent}$  Eq. S3.11

309  $\text{efficiency} = COD_{SR,remove} / COD_{SR,inflow} \times 100\%$  Eq. S3.12

310

311 **Table S3.2** CODs removal efficiency (%) from the metacommunity, the local communities L1-L5 and the

312 regional pool R per phase. The CODs inflow ( $COD_{Sinflow}$ ), CODs effluent ( $COD_{Seffluent}$ ) and removed COD

313 ( $COD_{remove}$ ) were also given.

314

| phase            | system        | $COD_{Sinflow}$ (mg min <sup>-1</sup> ) | $COD_{Seffluent}$ (mg min <sup>-1</sup> ) | $COD_{Sremove}$ (mg min <sup>-1</sup> ) | removal efficiency (%) |
|------------------|---------------|-----------------------------------------|-------------------------------------------|-----------------------------------------|------------------------|
| Insular I        | L1            | 0.5048                                  | 0.0768                                    | 0.4280                                  | 84.8                   |
|                  | L2            |                                         | 0.0785                                    | 0.4264                                  | 84.5                   |
|                  | L3            |                                         | 0.1099                                    | 0.3950                                  | 78.2                   |
|                  | L4            |                                         | 0.1122                                    | 0.3926                                  | 77.8                   |
|                  | L5            |                                         | 0.1581                                    | 0.3468                                  | 68.7                   |
| RC <sub>10</sub> | metacommunity | 2.5242                                  | 0.6030                                    | 1.9212                                  | 76.1                   |
|                  | L1            | 0.5132                                  | 0.1598                                    | 0.3534                                  | 68.9                   |
|                  | L2            |                                         | 0.0892                                    | 0.4240                                  | 82.6                   |
|                  | L3            |                                         | 0.1312                                    | 0.3820                                  | 74.4                   |
|                  | L4            |                                         | 0.1580                                    | 0.3552                                  | 69.2                   |
|                  | L5            |                                         | 0.1974                                    | 0.3158                                  | 61.5                   |
|                  | R             | 0.7356                                  | 0.6700                                    | 0.0656                                  | 8.9                    |
| RC <sub>50</sub> | metacommunity | 2.5242                                  | 0.5027                                    | 2.0215                                  | 80.1                   |
|                  | L1            | 0.6054                                  | 0.2165                                    | 0.3889                                  | 64.2                   |
|                  | L2            |                                         | 0.2136                                    | 0.3918                                  | 64.7                   |
|                  | L3            |                                         | 0.2039                                    | 0.4015                                  | 66.3                   |
|                  | L4            |                                         | 0.1912                                    | 0.4142                                  | 68.4                   |
|                  | L5            |                                         | 0.2086                                    | 0.3968                                  | 65.5                   |
|                  | R             | 1.0338                                  | 1.0054                                    | 0.0284                                  | 2.7                    |
| RC <sub>80</sub> | metacommunity | 2.5242                                  | 0.3152                                    | 2.2090                                  | 87.5                   |

|            |    |        |        |        |         |
|------------|----|--------|--------|--------|---------|
|            | L1 | 0.7885 | 0.3074 | 0.4811 | 61.0    |
|            | L2 |        | 0.2992 | 0.4893 | 62.1    |
|            | L3 |        | 0.3048 | 0.4837 | 61.3    |
|            | L4 |        | 0.2932 | 0.4953 | 62.8    |
|            | L5 |        | 0.3304 | 0.4581 | 58.1    |
|            | R  |        | 1.5350 | 1.5760 | -0.0410 |
| Insular II | L1 | 0.5048 | 0.1309 | 0.3739 | 74.1    |
|            | L2 |        | 0.1190 | 0.3858 | 76.4    |
|            | L3 |        | 0.1327 | 0.3721 | 73.7    |
|            | L4 |        | 0.1311 | 0.3738 | 74.0    |
|            | L5 |        | 0.1551 | 0.3497 | 69.3    |

315

316 As shown in Table S3.2, the CODs removal efficiency of the single local communities L1-L5  
317 decreased slightly from the average values of Insular I and Insular II phases ( $78.8 \pm 6.6\%$  and  
318  $73.5 \pm 2.6\%$ ) with  $71.3 \pm 7.8\%$  in  $RC_{10}$ ,  $65.8 \pm 1.6\%$  in  $RC_{50}$  and  $61.1 \pm 1.8\%$  in  $RC_{80}$ . In the  
319 regional pool R the removal efficiency is very low or not existent because a balance between the  
320 inflow carbon ( $COD_{R,inflow}$ ) and the carbon lost to the outflow ( $COD_{R,effluent}$ ) is reached. The CODs  
321 removal for the whole metacommunity increased with mass transfer from  $76.1\%$  in  $RC_{10}$  to  $87.5\%$   
322 in  $RC_{80}$ . We assume that on metacommunity scale, the significant increases in biomass (about  
323 twofold  $COD_b$  value, Table S3.1) accompanied by the higher recycling rates had allowed the input  
324 nutrients to be mineralized more completely. Therefore, the function of carbon removal was  
325 enhanced by the looped mass transfer approach.

326

### 327 **Function 2: $NH_4$ removal by the local communities L1-L5, the regional pool R, and the metacommunity**

328  $NH_4$  removal from local communities L1-L5, the regional pool R, and the metacommunity was  
329 calculated similar to the CODs removal and the same basic equations were used (Eq. S3.1-12,  
330 Table S3.1). First, we estimated the organic N content of the three different organic sources of  
331 nitrogen in our medium [peptone from meat (CAS 91079-38-8): 11.0-14.0 w/w %; meat extract  
332 (CAS 68990-09-0): 11.5-12.5 w/w %; yeast extract (CAS 8013-01-2):  $\geq 10.5$  w/w %; Merck KGaA,  
333 Darmstadt, Germany]. The estimated organic N content in the 1 x medium (Insular I and II) was  
334 about  $67.8 \text{ mg L}^{-1}$ , for 1.1 x medium ( $RC_{10}$ )  $74.6 \text{ mg L}^{-1}$ , for 2 x medium ( $RC_{50}$ )  $135.6 \text{ mg L}^{-1}$ , and  
335 for 5 x medium ( $RC_{80}$ )  $339.0 \text{ mg L}^{-1}$ . This ammonium bound in organic sources was set free by  
336 the activity of the wastewater community, thereby increasing the concentration of ammonium in  
337 the medium manifold. These amounts of ammonium were also metabolized to nitrogen by the  
338 activity of the wastewater communities. Therefore, the measured  $NH_4$  values are a result of the  
339 activity of all microbial communities and the nitrogen that was provided by the medium. For the  
340 calculation of the removal efficiency we used the measured  $NH_4$  values in the local communities

341 L1-L5 and the regional pool R, as well as the estimated NH<sub>4</sub> from organic N in medium. For each  
 342 phase, the NH<sub>4</sub> removal efficiency (%) was determined with the basic equations used for CODs  
 343 removal (Eq. S3.1-12). The used terms for the metacommunity and the local communities L1-L5  
 344 are:

345 NH<sub>4inflow</sub> is the measured NH<sub>4</sub> plus the estimated NH<sub>4</sub> converted from the organic-N of the  
 346 medium feed per minute;

347 NH<sub>4L,inflow</sub> is the measured NH<sub>4</sub> plus estimated NH<sub>4</sub> converted from the organic-N of the medium  
 348 free per minute plus the inflow from the regional pool;

349 NH<sub>4medium</sub> is the measured NH<sub>4</sub> of the medium.

350 insular phases I & II: x1 (6.5 ± 0.2 mg L<sup>-1</sup>, Table S3.1):

351 mass transfer RC<sub>10</sub>: x1.1 (7.2 mg L<sup>-1</sup>)

352 mass transfer RC<sub>50</sub>: x2 (13.0 mg L<sup>-1</sup>)

353 mass transfer RC<sub>80</sub>: x5 (32.5 mg L<sup>-1</sup>)

354 N<sub>organic</sub> is the estimated NH<sub>4</sub> converted from organic-N of the medium:

355 insular phases I & II: x1 (67.8 mg L<sup>-1</sup>).

356 mass transfer RC<sub>10</sub>: x1.1 (74.6 mg L<sup>-1</sup>)

357 mass transfer RC<sub>50</sub>: x2 (135.6 mg L<sup>-1</sup>)

358 mass transfer RC<sub>80</sub>: x5 (339.0 mg L<sup>-1</sup>)

359 NH<sub>4R</sub> is the average NH<sub>4</sub> of the regional pool R per each phase shown in Table S3.1;

360 5 is the number of local communities L1-L5;

361 medium flow rate per phase is shown in Table S2.1;

362 recycling flow rate per phase is shown in Table S2.1;

363

364 for the NH<sub>4</sub> removal of metacommunity, Eq. S3.1 was exchange to

365 
$$\text{NH}_{4\text{inflow}} = 5 \times \text{medium flow rate} \times (\text{NH}_{4\text{medium}} + \text{N}_{\text{organic}}) \quad \text{Eq. S3.13}$$

366 for the NH<sub>4</sub> removal per each of local communities L1-L5, Eq. S3.5 was exchange to

367 
$$\text{NH}_{4\text{L,inflow}} = \text{medium flow rate} \times (\text{NH}_{4\text{medium}} + \text{N}_{\text{organic}}) + \text{recycling flow rate} \times \text{NH}_{4\text{R}} \quad \text{Eq. S3.14}$$

368

369 **Table S3.3** NH<sub>4</sub> removal efficiency (%) from the metacommunity, the local communities L1-L5 and the  
 370 regional pool R per phase. The measured NH<sub>4</sub> values, the estimated organic N in medium (N<sub>organic</sub>), NH<sub>4</sub>  
 371 inflow (NH<sub>4inflow</sub>), NH<sub>4</sub> effluent (NH<sub>4remain</sub>) and removed NH<sub>4</sub> (NH<sub>4remove</sub>) were also given.

| phase            | system        | NH <sub>4</sub><br>(mg N L <sup>-1</sup> ) | N <sub>organic</sub><br>(mg N L <sup>-1</sup> ) | NH <sub>4inflow</sub><br>(x 10 <sup>-3</sup> mg N min <sup>-1</sup> ) | NH <sub>4effluent</sub><br>(x 10 <sup>-3</sup> mg N min <sup>-1</sup> ) | NH <sub>4remove</sub><br>(x 10 <sup>-3</sup> mg N min <sup>-1</sup> ) | removal<br>efficiency (%) |
|------------------|---------------|--------------------------------------------|-------------------------------------------------|-----------------------------------------------------------------------|-------------------------------------------------------------------------|-----------------------------------------------------------------------|---------------------------|
| Insular I        | L1            | 29.3 ± 3.3                                 | 67.8                                            | 29.7                                                                  | 11.7                                                                    | 18.0                                                                  | 60.6                      |
|                  | L2            | 24.9 ± 5.0                                 |                                                 |                                                                       | 10.0                                                                    | 19.7                                                                  | 66.3                      |
|                  | L3            | 23.9 ± 1.1                                 |                                                 |                                                                       | 9.6                                                                     | 20.1                                                                  | 67.7                      |
|                  | L4            | 27.6 ± 5.7                                 |                                                 |                                                                       | 11.0                                                                    | 18.7                                                                  | 63.0                      |
|                  | L5            | 25.6 ± 3.9                                 |                                                 |                                                                       | 10.2                                                                    | 19.5                                                                  | 65.7                      |
| RC <sub>10</sub> | metacommunity | -                                          | 74.6                                            | 148.5                                                                 | 17.1                                                                    | 131.4                                                                 | 88.5                      |

|                  |               |             |       |       |      |       |      |
|------------------|---------------|-------------|-------|-------|------|-------|------|
|                  | L1            | 28.4 ± 6.1  | 74.6  | 30.3  | 11.4 | 19.0  | 62.7 |
|                  | L2            | 25.1 ± 4.3  |       |       | 10.0 | 20.3  | 67.0 |
|                  | L3            | 30.3 ± 2.0  |       |       | 12.1 | 18.2  | 60.1 |
|                  | L4            | 27.4 ± 4.5  |       |       | 11.0 | 19.4  | 64.0 |
|                  | L5            | 16.4 ± 7.6  |       |       | 6.6  | 23.8  | 78.5 |
|                  | R             | 9.5 ± 2.8   |       |       | 0    | 51.0  | 19.0 |
| RC <sub>50</sub> | metacommunity | -           | 135.6 | 148.5 | 9.8  | 138.7 | 93.4 |
|                  | L1            | 27.7 ± 0.8  | 135.6 | 34.3  | 11.1 | 23.2  | 67.6 |
|                  | L2            | 31.5 ± 1.5  |       |       | 12.6 | 21.7  | 63.3 |
|                  | L3            | 30.2 ± 2.3  |       |       | 12.1 | 22.2  | 64.7 |
|                  | L4            | 29.5 ± 0.9  |       |       | 11.8 | 22.5  | 65.6 |
|                  | L5            | 24.5 ± 3.0  |       |       | 9.8  | 24.5  | 71.4 |
|                  | R             | 9.8 ± 3.0   |       |       | 0    | 57.4  | 19.6 |
| RC <sub>80</sub> | metacommunity | -           | 339.0 | 148.5 | 2.3  | 146.2 | 98.5 |
|                  | L1            | 28.9 ± 13.0 | 339.0 | 42.0  | 11.6 | 30.4  | 72.4 |
|                  | L2            | 39.6 ± 15.1 |       |       | 15.8 | 26.1  | 62.1 |
|                  | L3            | 29.5 ± 14.4 |       |       | 11.8 | 30.1  | 71.7 |
|                  | L4            | 36.8 ± 14.3 |       |       | 14.7 | 27.2  | 64.8 |
|                  | L5            | 29.2 ± 12.1 |       |       | 11.7 | 30.2  | 71.9 |
|                  | R             | 5.7 ± 2.8   |       |       | 0    | 65.6  | 11.4 |
| Insular II       | L1            | 84.2 ± 75.3 | 67.8  | 29.7  | 8.6  | 21.1  | 71.0 |
|                  | L2            | 86.2 ± 79.6 |       |       | 9.2  | 20.5  | 69.0 |
|                  | L3            | 85.0 ± 77.9 |       |       | 8.3  | 21.4  | 72.1 |
|                  | L4            | 84.2 ± 79.1 |       |       | 9.0  | 20.7  | 69.7 |
|                  | L5            | 84.8 ± 78.1 |       |       | 7.5  | 22.2  | 74.7 |

372

373 As shown in Table S3.3, the NH<sub>4</sub> removal efficiency of the single local communities L1-L5 (67.5  
374 ± 4.7%) did not change from the average values of Insular I and Insular II phases (64.6 ± 2.8%  
375 and 71.3 ± 2.3%) with 66.5 ± 7.2% in RC<sub>10</sub>, 66.5 ± 3.2% in RC<sub>50</sub> and 68.6 ± 4.8% in RC<sub>80</sub>. In the  
376 regional pool R the removal efficiency is on average 70.4 ± 10.7%. The NH<sub>4</sub> removal for the whole  
377 metacommunity increased with mass transfer from 62.7% in RC<sub>10</sub> to 98.5% in RC<sub>80</sub>. Therefore,  
378 the function of the nitrogen removal was enhanced by the looped mass transfer approach.

379

### 380 **Function 3: PHO<sub>t</sub> removal by the local communities L1-L5, the regional pool R, and metacommunity**

381 PHO<sub>t</sub> removal by the local communities L1-L5, the regional pool R, and the metacommunity was  
382 calculated as follows: The measured PHO<sub>t</sub> values are the measured phosphate values calculated  
383 to elementary phosphorus [PHO<sub>t</sub> (mg P L<sup>-1</sup>)]. This value does not include phosphorus bound in  
384 biomass, which is calculated as DWP (mg P L<sup>-1</sup>) based on an estimated phosphorus content in  
385 biomass of 4% (2). In our study, DWP is then calculated using the average value of measured  
386 dry weight per reactor per phase (DW, Table S3.1). The flow rate P<sub>PHO<sub>t</sub>+DWP</sub> is calculated per



387 minute and regards both the PHOt and the P-biomass values. The  $PHOt_{\text{effluent}}$  values are  
 388 representing the phosphate (as phosphorus) values still in the flow of effluent per minute. For  
 389 each phase, the removal efficiency (%) for PHOt were determined. The used terms for the  
 390 metacommunity are:

391  $DW_R$  is the average DW of the regional pool R per each phase shown in Table S3.1;  
 392 4% is the estimate proportion of phosphorus in biomass (dry weight);  
 393  $DWP_R$  is the estimated bound P in biomass for regional pool R per each phase;  
 394  $PHOt_R$  is the average PHOt for regional pool R per each phase (Table S3.1);  
 395  $P_{PHOt+DWP}$  is the value of PHOt plus DWP flow through metacommunity per min;  
 396 5 is the number of local communities L1-L5;  
 397 medium flow rate per phase is shown in Table S2.1;  
 398 effluent flow rate (5 × medium flow rate) per phase is shown in Fig. 1;  
 399  $PHOt_{\text{effluent}}$  is the PHOt still in the effluent from metacommunity per minute;  
 400  $PHOt_{\text{remove}}$  is the PHOt removed per minute by microbial communities for L1-L5 and R;

401

402  $DWP_R = 4\% \times DW_R$  Eq. S3.15

403  $P_{PHOt+DWP} = 5 \times \text{medium flow rate} \times (PHOt_R + DWP_R)$  Eq. S3.16

404  $PHOt_{\text{effluent}} = \text{effluent flow rate} \times PHOt_R$  Eq. S3.17

405  $PHOt_{\text{remove}} = P_{PHOt+DWP} - PHOt_{\text{effluent}}$  Eq. S3.18

406  $\text{efficiency} = PHOt_{\text{remove}} / P_{PHOt+DWP} \times 100\%$  Eq. S3.19

407

408 The used terms for the local communities L1-L5 are:

409  $DW_L$  is the average DW of the each of local communities L1-L5 per each phase shown in Table  
 410 S3.1;  
 411 4% is the estimate proportion of phosphorus in biomass (dry weight);  
 412  $DWP_L$  is the estimated bound P in biomass for each of local communities L1-L5 per each phase;  
 413  $PHOt_L$  is the average PHOt for each of local communities L1-L5 per each phase (Table S3.1);  
 414  $P_{L,PHOt+DWP}$  is the value of PHOt plus DWP flow through each of local communities L1-L5 per min;  
 415 medium flow rate per phase is shown in Table S2.1;  
 416 recycling flow rate per phase is shown in Table S2.1;  
 417 effluent flow rate is  $0.4 \text{ mL min}^{-1}$ ;  
 418  $PHOt_{L,\text{effluent}}$  is the PHOt still in the effluent from each of local communities L1-L5 per minute;  
 419  $PHOt_{L,\text{remove}}$  is the PHOt removed per minute by each of microbial communities L1-L5;

420

421  $DWP_L = 4\% \times DW_L$  Eq. S3.20

422  $P_{L,PHOt+DWP} = (\text{medium flow rate} + \text{recycling flow rate}) \times (PHOt_L + DWP_L)$  Eq. S3.21

423  $PHOt_{L,\text{effluent}} = \text{effluent flow rate} \times PHOt_L$  Eq. S3.22

424  $PHO_{tL,remove} = P_{L,PHO+DWP} - PHO_{tL,effluent}$  Eq. S3.23

425  $efficiency = PHO_{tL,remove} / P_{L,PHO+DWP} \times 100\%$  Eq. S3.24

426

427 The used terms for the regional pool R are:

428  $DW_R$  is the average DW of the regional pool R per each phase shown in Table S3.1;

429 4% is the estimate proportion of phosphorus in biomass (dry weight);

430  $DWP_R$  is the estimated bound P in biomass for the regional pool R per each phase;

431  $PHO_{tR}$  is the average PHOt for the regional pool R per each phase (Table S3.1);

432  $P_{R,PHO+DWP}$  is the value of PHOt plus DWP flow through the regional pool R per min;

433 5 is the number of local communities L1-L5;

434 medium flow rate per phase is shown in Table S2.1;

435 recycling flow rate per phase is shown in Table S2.1;

436 effluent flow rate is  $2.0 \text{ mL min}^{-1}$  which is the sum of the effluent and the recycling flow rate;

437  $PHO_{tR,effluent}$  is the PHOt still in the effluent from the regional pool R per minute plus recycled flow to local communities L1-L5 per minute;

439  $PHO_{tR,remove}$  is the PHOt removed per minute by microbial community of the regional pool R;

440

441  $DWP_R = 4\% \times DW_R$  Eq. S3.25

442  $P_{R,PHO+DWP} = 5 \times (\text{medium flow rate} + \text{recycling flow rate}) \times (PHO_{tR} + DWP_R)$  Eq. S3.26

443  $PHO_{tR,effluent} = \text{effluent flow rate} \times PHO_{tR}$  Eq. S3.27

444  $PHO_{tR,remove} = P_{R,PHO+DWP} - PHO_{tR,effluent}$  Eq. S3.28

445  $efficiency = PHO_{tR,remove} / P_{R,PHO+DWP} \times 100\%$  Eq. S3.29

446

447 **Table S3.4** PHOt removal efficiency (%) from the metacommunity, the local communities L1-L5 and the  
 448 regional pool R per phase. The measured PHOt (phosphate calculated to phosphorus) values, estimated  
 449 P bound to biomass (DWP), PHOt plus DWP flow ( $P_{PHO+DWP}$ ), PHOt effluent ( $PHO_{effluent}$ ) and removed  
 450 PHOt ( $PHO_{remove}$ ) were also given.

| phase            | system        | PHOt<br>(mg P L <sup>-1</sup> ) | DWP<br>(mg P L <sup>-1</sup> ) | $P_{PHO+DWP}$<br>( $\times 10^{-3}$ mg P min <sup>-1</sup> ) | $PHO_{effluent}$<br>( $\times 10^{-3}$ mg P min <sup>-1</sup> ) | $PHO_{remove}$<br>( $\times 10^{-3}$ mg P min <sup>-1</sup> ) | removal<br>efficiency<br>(%) |
|------------------|---------------|---------------------------------|--------------------------------|--------------------------------------------------------------|-----------------------------------------------------------------|---------------------------------------------------------------|------------------------------|
| Insular I        | L1            | 64.5 ± 4.5                      | 10.3                           | 29.9                                                         | 25.8                                                            | 4.1                                                           | 13.8                         |
|                  | L2            | 63.6 ± 4.2                      | 13.0                           | 30.6                                                         | 25.4                                                            | 5.2                                                           | 17.1                         |
|                  | L3            | 63.3 ± 2.2                      | 11.7                           | 30.0                                                         | 25.3                                                            | 4.7                                                           | 15.6                         |
|                  | L4            | 61.1 ± 3.3                      | 9.0                            | 28.0                                                         | 24.4                                                            | 3.6                                                           | 13.0                         |
|                  | L5            | 64.6 ± 2.2                      | 9.3                            | 29.6                                                         | 25.8                                                            | 3.8                                                           | 12.8                         |
| RC <sub>10</sub> | metacommunity | -                               | -                              | 129.7                                                        | 119.0                                                           | 10.7                                                          | 8.3                          |
|                  | L1            | 72.0 ± 2.5                      | 7.0                            | 31.6                                                         | 28.8                                                            | 2.8                                                           | 8.9                          |
|                  | L2            | 71.7 ± 1.0                      | 10.7                           | 32.9                                                         | 28.7                                                            | 4.2                                                           | 12.9                         |
|                  | L3            | 73.0 ± 1.8                      | 7.0                            | 32.0                                                         | 29.2                                                            | 2.8                                                           | 8.7                          |
|                  | L4            | 69.1 ± 2.8                      | 3.0                            | 28.8                                                         | 27.6                                                            | 1.2                                                           | 4.3                          |
|                  | L5            | 68.6 ± 3.6                      | 5.7                            | 29.7                                                         | 27.4                                                            | 2.3                                                           | 7.8                          |

|                  |               |              |      |       |       |      |      |
|------------------|---------------|--------------|------|-------|-------|------|------|
|                  | R             | 66.1 ± 3.5   | 6.0  | 144.1 | 132.2 | 11.9 | 8.3  |
| RC <sub>50</sub> | metacommunity | -            | -    | 111.9 | 95.5  | 16.4 | 14.7 |
|                  | L1            | 99.9 ± 3.8   | 16.0 | 46.4  | 40.0  | 6.4  | 13.7 |
|                  | L2            | 104.2 ± 8.1  | 12.0 | 46.5  | 41.7  | 4.8  | 10.3 |
|                  | L3            | 101.1 ± 1.2  | 14.0 | 46.0  | 40.4  | 5.6  | 12.2 |
|                  | L4            | 93.3 ± 10.9  | 14.0 | 42.9  | 37.3  | 5.6  | 13.1 |
|                  | L5            | 98.7 ± 0.9   | 12.0 | 44.3  | 39.5  | 4.8  | 10.8 |
|                  | R             | 99.9 ± 3.8   | 12.0 | 223.8 | 191.0 | 32.8 | 14.7 |
| RC <sub>80</sub> | metacommunity | -            | -    | 101.8 | 89.8  | 12.0 | 11.8 |
|                  | L1            | 226.6 ± 6.7  | 31.3 | 103.2 | 90.6  | 12.6 | 12.2 |
|                  | L2            | 238.0 ± 10.6 | 38.7 | 110.7 | 95.2  | 15.5 | 14.0 |
|                  | L3            | 233.0 ± 9.8  | 30.7 | 105.5 | 93.2  | 12.3 | 11.6 |
|                  | L4            | 237.1 ± 8.9  | 30.0 | 106.9 | 94.8  | 12.1 | 11.3 |
|                  | L5            | 233.9 ± 7.7  | 38.0 | 108.8 | 93.6  | 15.2 | 14.0 |
|                  | R             | 224.6 ± 5.1  | 30.0 | 509.2 | 449.2 | 60.0 | 11.8 |
| Insular II       | L1            | 84.2 ± 75.3  | 11.0 | 38.1  | 33.7  | 4.4  | 11.5 |
|                  | L2            | 86.2 ± 79.6  | 14.0 | 40.1  | 34.5  | 5.6  | 14.0 |
|                  | L3            | 85.0 ± 77.9  | 12.0 | 38.8  | 34.0  | 4.8  | 12.4 |
|                  | L4            | 84.2 ± 79.1  | 11.0 | 38.1  | 33.7  | 4.4  | 11.5 |
|                  | L5            | 84.8 ± 78.1  | 13.3 | 39.3  | 33.9  | 5.4  | 13.7 |

451 As shown in Table S3.4, the PHOt removal efficiency of the single local communities L1-L5 was  
452 low with average value  $12.0 \pm 2.6\%$ : in Insular I and Insular II phases the removal efficiencies  
453 were  $14.5 \pm 1.9\%$  and  $12.6 \pm 1.2\%$ , and remained nearly unchanged with  $8.5 \pm 3.1\%$  in RC<sub>10</sub>,  
454  $12.0 \pm 1.5\%$  in RC<sub>50</sub> and  $12.6 \pm 1.3\%$  in RC<sub>80</sub>. In the regional pool R the removal efficiency was  
455 on average  $10.6 \pm 3.2\%$ . The PHOt removal for the whole metacommunity was also not affected  
456 by mass transfer with average value  $11.3 \pm 3.2\%$ . Therefore, the function of the PHOt removal  
457 was not change by the looped mass transfer approach.

458

## 459 S4: Flow cytometric analysis of community structure

### 460 Preparation of cell samples

#### 461 Step 1: Cell sample fixation

462 For fixation,  $2 \times 2.5$  mL samples were taken from each reactor and placed in glass tubes.  
463 Supernatants were removed after centrifugation at  $3,200 \times g$  for 10 min at  $4^\circ\text{C}$ . For every tube, the  
464 cells in the pellet were suspended in 2 mL paraformaldehyde solution [PFA, 2% in phosphate-  
465 buffered saline (PBS, 6 mM  $\text{Na}_2\text{HPO}_4$ , 1.8 mM  $\text{NaH}_2\text{PO}_4$ , 145 mM NaCl, pH 7)] and incubated for  
466 30 min at room temperature (RT). Afterwards, the cells were centrifuged again ( $3,200 \times g$ , 10 min,  
467  $4^\circ\text{C}$ ), resuspended in 4 mL 70% ethanol, and then stored at  $-20^\circ\text{C}$ .

468

## 469 Step 2: DNA staining with DAPI

470 An aliquot of the fixed sample was taken into a glass tube and washed twice with PBS (3,200×g,  
471 10 min, 4°C), and then adjusted with PBS to an  $OD_{700, d=5 \text{ mm}}$  of 0.035. Two mL of the adjusted  
472 cell solution was centrifuged (3,200×g, 10 min, 4°C), and the pellet was resuspended in 1 mL  
473 solution A (0.11 M citric acid and 4.1 mM Tween 20 in bidistilled water) and incubated at RT for  
474 20 min, the first 10 min in an ultrasonication bath (35 kHz; Merck Eurolab, Darmstadt, Germany).  
475 Solution A was discarded after centrifugation (3,200×g, 10 min, 4°C). The cells were resuspended  
476 in 2 mL solution B [0.24  $\mu\text{M}$  DAPI (4',6-diamidino-2-phenylindole, Lot. 118M4025V; Sigma-Aldrich,  
477 St. Louis, MO, USA) in phosphate buffer (289 mM  $\text{Na}_2\text{HPO}_4$  and 128 mM  $\text{NaH}_2\text{PO}_4$  in bidistilled  
478 water)] and incubated overnight at RT and in the dark before flow cytometric measurement.

479

## 480 Cytometric analysis

### 481 Step 1: Instrumental setup

482 The cells were flow cytometrically measured in a MoFlo Legacy Cell Sorter using the software  
483 Summit v4.3 (Beckman Coulter, Brea, CA, USA). The instrument was equipped with a 488 nm  
484 argon laser (400 mW; Coherent, Santa Clara, CA, USA) and a 355 nm UV laser (150 mW, Xcyte  
485 CY-355-150; Lumentum, Milpitas, CA, USA). The 488 nm laser light was used for detection of the  
486 forward scatter (FSC, 488/10 nm band pass) and the side scatter (SSC, 488/10 nm band pass,  
487 trigger signal). The DAPI fluorescence was measured at signal channel FL4 (450/65 nm band  
488 pass) after excitation with the UV laser.

489 The fluidic system was run at constant sheath pressure of 56.0 psi with a 70  $\mu\text{m}$  nozzle. The  
490 sample pressure was adjusted within the range of 55.8-56.2 psi, in order to obtain a stable event  
491 measurement of around 3,500 events per second. The sheath fluid was composed of 10-fold  
492 sheath buffer (19 mM  $\text{KH}_2\text{PO}_4$ , 38 mM KCl, 166 mM  $\text{Na}_2\text{HPO}_4$  and 1.39 M NaCl with 0.13  $\mu\text{m}$   
493 filtrated Millipore water) and further diluted with filtrated Millipore water to a 0.2-fold working  
494 solution (for cell sorting: 0.5-fold working solution).

495 For the daily optical calibration of the cytometer in the linear range, 1  $\mu\text{m}$  blue fluorescent  
496 FluoSpheres (F-8815; Molecular Probes, Eugene, OR, USA) and 2  $\mu\text{m}$  yellow-green fluorescent  
497 FluoSpheres (F8827; ThermoFisher Scientific, Waltham, MA, USA) were used. For calibration in  
498 the logarithmic range, 0.5  $\mu\text{m}$  and 1.0  $\mu\text{m}$  UV Fluoresbrite Microspheres (18339 and 17458,  
499 respectively; Polysciences, Warrington, PA, USA) were used.

500 To ensure the reliability and comparability of the cell fixation and staining procedures, a microbial  
501 cytometric mock community (mCMC) (3) was used each day. The cells of the mCMC were

502 handled identically to the staining protocol in the section S4 (steps 1 & 2: Preparation of cell  
503 samples). The use of the mCMC guaranteed a high resolution by ensuring optimal optical settings  
504 of the flow cytometer and comparable cytometric measurements of bioreactor samples, even if  
505 they were measured over months.

506

#### 507 [Step 2: Measuring community samples](#)

508 Prior to measurement, DAPI-stained cells were filtered to remove larger particles by using a nylon  
509 filter (CellTrics® 50 µm; Sysmex Partec GmbH, Görlitz, Germany) and were spiked with 0.5 µm  
510 and 1 µm UV Fluoresbrite Microspheres (18339 and 17458, respectively; Polysciences). The  
511 microspheres served as internal standards to monitor instrument stability and to allow the correct  
512 comparison of samples (Fig. S4.1a). Cell data were collected in logarithmically scaled 2D-dot  
513 plots according to DAPI fluorescence for DNA content and forward scatter (FSC) for cell size-  
514 related information. A cell gate was defined, which comprised 200,000 virtual cells for each  
515 measurement (cell gate; Fig. S4.1a). An overview of all measured samples from each bioreactor  
516 can be seen in Movie S1.

517

518 **Movie S1** Overview on all measured samples from each bioreactor. All cells are analyzed according to their  
519 DAPI fluorescence for DNA content and forward scatter (FSC) for cell size-related information. 200,000  
520 cells per analysis were measured.

521

#### 522 [Step 3: Creation of the gate-template to determine the community structure](#)

523 According to the measured samples, apparent cell clusters in 2D-dot plots (FSC and DAPI  
524 fluorescence) were gated sample per sample (4) and all defined gates were combined together  
525 to create the gate template. In this study, the gate template included 80 gates (G1 to G80; Fig.  
526 S4.1b), and we defined the cell population in each of the gates as a subcommunity (SC). The  
527 relative cell abundance per SC (G1-G80) within the cell gate was computed using FlowJo™ v10  
528 (FlowJo LLC, Ashland, OR, USA) automatically. A list of the data on relative cell abundance per  
529 gate per sample is given in the Dataset S2.

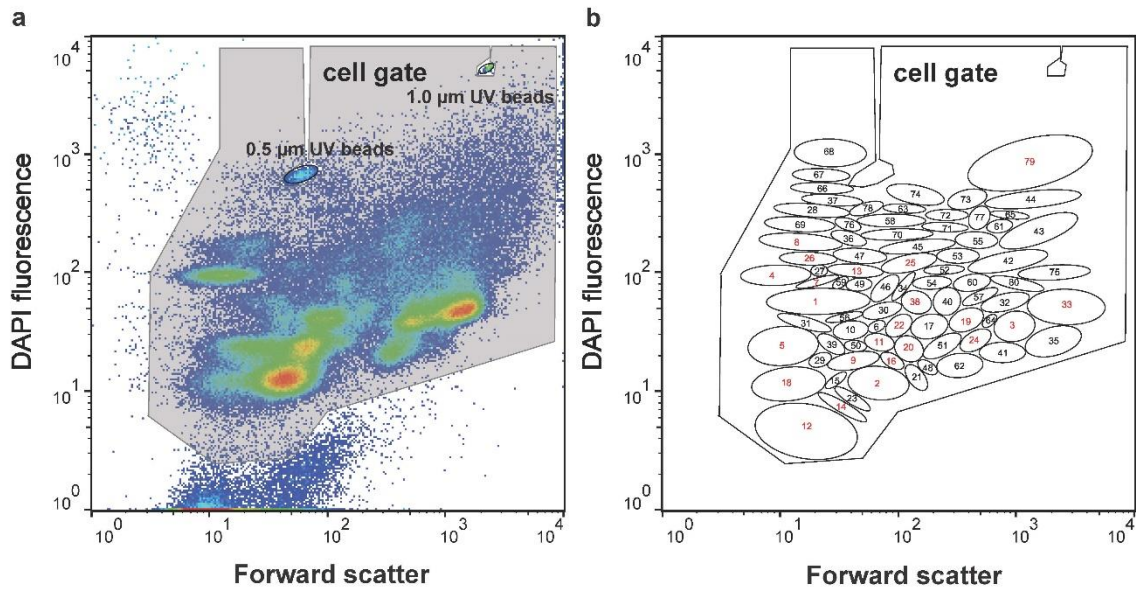

530

531 **Figure S4.1** Gating strategy. First, a cell gate was defined for the measurement of 200,000 cells. Calibration  
 532 beads were excluded. Afterwards, the gate template was created by defining 80 gates (i.e., G1-G80), based  
 533 on forward scatter (Forward scatter) and DAPI fluorescence (DAPI fluorescence). The cell numbers per  
 534 gate and sample were used for evaluations in further data evaluation pipelines. Sorted gates are marked  
 535 by red numbers.

536

537 **Step 4: Cell sorting**

538 To determine the taxonomic affiliation of selected SCs, cell sorting was performed. The cell sorting  
 539 procedure was carried out in accordance with the work of Cichocki et al. (3). Briefly, the positions  
 540 of gates to be sorted were defined and assigned using the Summit software (V4.3; Beckman  
 541 Coulter, Brea, CA, USA). The cell sorting was performed using the four-way-sort option and the  
 542 '1.0 Drop Pure' sort mode. A total of 500,000 cells of each selected gate were sorted into a 1.5  
 543 mL Eppendorf tube at an event rate of not more than 1,500 events per second. Sorted cells were  
 544 harvested from the sheath buffer by centrifugation (20,000×g, 6°C, 25 min), and the cell pellets  
 545 were stored at -20°C for subsequent DNA isolation.

546

547

## 548 S5: Cell counting by flow cytometry

### 549 Preparation of cells for the determination of cell numbers

#### 550 Step 1: Cell sample dilution

551 Live cells (0.2 mL) were sampled from the bioreactors and directly diluted in three standardized  
552 steps (all in all 1/500-fold) to about  $10^7$  cells per mL using 0.85% saline solution.

553

#### 554 Step 2: DNA staining with SYTO<sup>®</sup>9

555 SYTO<sup>®</sup>9 (Lot. 2088729; ThermoFisher Scientific, Eugene, OR, USA) is a cell-permeant nucleic  
556 acid stain, which was used in this study to stain fresh cell samples to distinguish cells from medium  
557 particles. A 35  $\mu$ M stock solution of SYTO<sup>®</sup>9 was prepared daily and stored on ice. The final cell  
558 solution contained 950  $\mu$ L diluted cell sample and 50  $\mu$ L 35  $\mu$ M SYTO<sup>®</sup>9, with a final concentration  
559 of 1.75  $\mu$ M SYTO<sup>®</sup>9. The cell solution was mixed and incubated for 15 min at RT before cell  
560 counting. The diluted and stained cell samples were measured on the same day.

561

### 562 Counting cell numbers

#### 563 Step 1: Instrumental setup

564 The cell counting was performed with the flow cytometer CyFlow<sup>®</sup>Space (Sysmex Partec GmbH,  
565 Görlitz, Germany) using the True Volumetric Absolute Counting mode, which counts cells in a  
566 fixed volume (0.2 mL). This device was equipped with a 488 nm argon laser (50mW; Sapphire,  
567 Coherent, Santa Clara, CA, USA). The fluorescence of the stained cells was measured using the  
568 filters 536/40 nm band pass for green fluorescence and 610/30 nm band pass for red  
569 fluorescence. For the daily optical calibration of the flow cytometer in the linear range, 0.5  $\mu$ m  
570 yellow-green fluorescent FluoSpheres (F8827; ThermoFisher Scientific, Waltham, MA, USA) and  
571 1.0  $\mu$ m yellow-green fluorescent FluoSpheres (F13081; ThermoFisher Scientific, Waltham, MA,  
572 USA) were used. These latter FluoSpheres were also added to each sample to ensure  
573 comparability of measurements.

#### 574 Step 2: Determination of total cell number

575 Before determining the total cell number (CN, mL<sup>-1</sup>), the cell suspension was filtered to remove  
576 larger particles by using a nylon filter (CellTrics<sup>®</sup> 50  $\mu$ m; Sysmex Partec GmbH, Görlitz, Germany).  
577 The measuring rate was adjusted to below 1,500 events per second. Dependent on the cell  
578 concentration, 100-200  $\mu$ L of the cell solution was added to 1-1.1 mL Millipore water to maintain  
579 the measuring rate. A cell gate was defined on the basis of SYTO<sup>®</sup>9 green and red fluorescence  
580 (Fig. S5.1) to differentiate the cells from instrumental and background noise. Total cell numbers



581 were counted automatically using the software FloMax (V2.4; Sysmex Partec GmbH, Germany).  
 582 Based on the cell numbers in diluted samples and the actual dilution factor, the CNs in local  
 583 communities L1-L5 and the regional pool R were calculated. In total, 421 values (71 per local  
 584 community and 66 per regional pool) were measured, as shown in Dataset S1 and visualized in  
 585 Fig. S5.2. In Table S5.1, the mean values and the standard deviation of cell numbers per phase  
 586 (balanced period) are shown for the local communities L1-L5 and the regional pool R,  
 587 respectively. The CN per SC was calculated by multiplying relative cell numbers per SC (Dataset  
 588 S2) by cell number per community (Dataset S3).  
 589

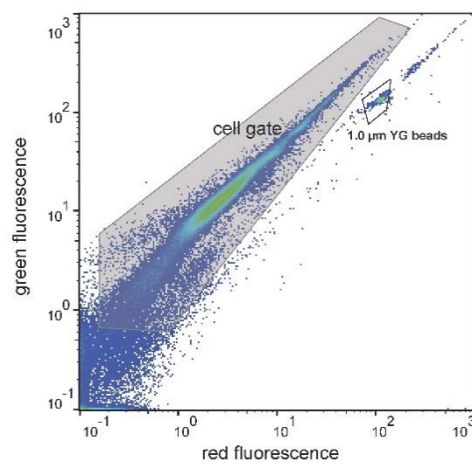

590 **Figure S5.1.** Cell gate for cell counting. The cell gate was set apart from instrumental noise, background  
 591 noise and calibration beads.

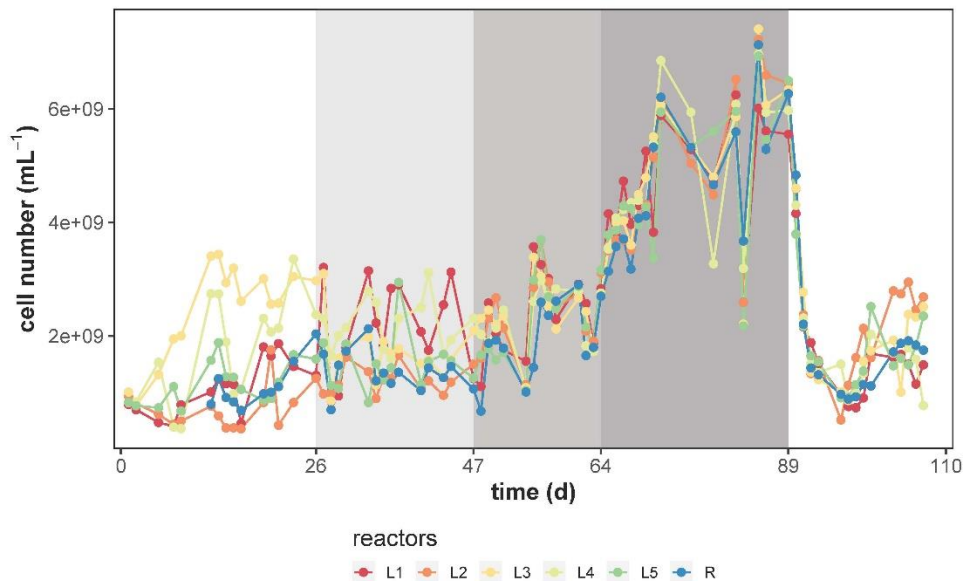

592

593 **Figure S5.2** Analysis of cell numbers (CN, mL<sup>-1</sup>) in the local communities L1-L5 and the regional pool R.

594 The shaded areas represent different phases with changed *RC*.

595

596 **Table S5.1** Summary of mean values and standard deviation (sd) of cell numbers ( $\times 10^9$  cells mL<sup>-1</sup>) per  
597 balanced period and phase of the local communities (L1-L5) and the regional pool (R).

| reactor                   | Insular I |      | RC <sub>10</sub> |      | RC <sub>50</sub> |      | RC <sub>80</sub> |      | Insular II |      |
|---------------------------|-----------|------|------------------|------|------------------|------|------------------|------|------------|------|
|                           | mean      | sd   | mean             | sd   | mean             | sd   | mean             | sd   | mean       | sd   |
| local communities (L1-L5) | 1.60      | 0.93 | 1.82             | 0.65 | 2.46             | 0.71 | 5.29             | 1.39 | 1.58       | 0.62 |
| regional pool (R)         | 1.02      | 0.26 | 1.38             | 0.31 | 2.05             | 0.67 | 5.40             | 1.02 | 1.41       | 0.44 |

598

599

600

## 601 [S6: DNA extraction and 16S rRNA gene amplicon sequencing](#)

602 The 16S rRNA gene amplicon sequencing analysis was performed as follows:

### 603 [Step 1: DNA extraction](#)

604 The DNA was extracted in accordance with a protocol from Cichocki et al. (3). In short, 70  $\mu$ L of  
605 Chelex 100 solution [Chelex 100 sodium form, Sigma-Aldrich, CAS no. 11139-85-8, preparation  
606 of 10% (wt/vol) with molecular-biology-grade water] was added to each frozen cell pellet from  
607 whole communities or sorted cells of SCs (Supplementary Information S4, Cytometric analysis,  
608 step 4). Whole-community pellets were thawed, OD<sub>700, d=5mm</sub> adjusted to 0.01 with sterile PBS and  
609 centrifuged at 20,000 $\times$ g for 25 min at 4°C prior to the Chelex addition. Negative controls (14  
610 controls, sheath buffer and 300  $\mu$ L of Chelex solution) and a positive control (ZymoBIOMICS™  
611 Microbial Community Standard; Zymo Research Europe GmbH, Freiburg, Germany) were  
612 included in the analysis. Each of the solutions was vortexed for 10 s, incubated at 95°C for 45  
613 min and centrifuged at 7,000 $\times$ g at 4°C for 5 min. Fifty  $\mu$ L of the supernatant, which contained the  
614 extracted DNA, was transferred to a new pre-chilled tube. Samples were stored at -20°C before  
615 further use.

616

### 617 [Step 2: DNA quality testing and library preparation for Illumina MiSeq sequencing](#)

618 DNA yield was determined using Qubit 3.0 (Thermo Fisher Scientific, Waltham, MA, USA). DNA  
619 extracts with more than 0.1 ng of DNA per  $\mu$ L were amplified for 25 PCR cycles and those with  
620 less than 0.1 ng per  $\mu$ L were amplified for 35 PCR cycles. Table S6.1 indicates the number of  
621 cycles used for PCR amplification of the different samples. 16S rRNA gene amplicon sequencing  
622 was performed on the V3-V4 region of the 16S rRNA gene region using the primers Pro341F 5'-  
623 CCTACGGGNBGCASCAG-3' (5) and Pro805R 5'-GACTACNVGGGTATCTAATCC-3' (6). These

624 primers and the barcoded primers used for the library were synthesized by Eurofins (Eurofins  
625 Scientific, Luxembourg City, Luxembourg). PCR amplification was performed in accordance with  
626 the procedure of Liu et al. (1) and checked for the presence of single band PCR products by gel  
627 electrophoresis (1.5% agarose). For each PCR batch, a negative control without any DNA was  
628 amplified for up to 35 cycles and checked by gel electrophoresis (1.5% agarose) to ensure that  
629 no contamination was present. In the absence of contamination, the samples were purified,  
630 quantified and equimolarly pooled in accordance with the work of Liu et al. (1). The pooled  
631 amplicon samples were sequenced with MiSeq (Illumina®, San Diego, CA, USA).

632

633 **Step 3: Processing of raw sequencing data, denoising and selection of 16S rRNA gene amplicon sequencing**  
634 **variants**

635 The raw sequence reads from Illumina Miseq were checked and separated according to their  
636 number of PCR cycles (Table S6.1) by using manifest files as indicated by the QIIME2 v2020.2,  
637 following the instructions of the developers (7). The paired-end sequence reads fastq files were  
638 demultiplexed using q2-demux. Subsequently, the primers were trimmed and low-quality reads  
639 were removed as defined by QIIME2 (7). Denoising and selection of amplicon sequencing  
640 variants were performed separately for samples amplified for 25 or 35 PCR cycles using DADA2,  
641 in accordance with the instructions of the developers (8).

642

643 **Table S6.1.** Metadata of different libraries from whole communities and sorted gates amplified based on  
644 25 and 35 PCR cycles. Run: the sequencing round in which the group of samples was sequenced; Type:  
645 the different sorted gates (G) and the whole-community (WC) samples; Identity: which samples were sorted  
646 or kept as a whole-community; PCR cycles: the number of cycles for which the different samples were  
647 amplified during PCR.

| sample ID | reactor | days | run  | type | identity | PCR-Cycles | sample ID | reactor | days | run  | type | identity     | PCR-Cycles |
|-----------|---------|------|------|------|----------|------------|-----------|---------|------|------|------|--------------|------------|
| Samp01    | R       | 85   | Run1 | G5   | sorted   | 35         | Samp80    | R       | 97   | Run2 | WC   | Community-88 | 25         |
| Samp02    | R       | 85   | Run1 | G12  | sorted   | 35         | Samp81    | L1      | 100  | Run2 | WC   | Community-89 | 25         |
| Samp03    | L2      | 86   | Run1 | G18  | sorted   | 35         | Samp82    | L3      | 100  | Run2 | WC   | Community-90 | 25         |
| Samp04    | L3      | 61   | Run1 | G7   | sorted   | 35         | Samp83    | L1      | 107  | Run2 | WC   | Community-91 | 25         |
| Samp05    | L3      | 61   | Run1 | G12  | sorted   | 35         | Samp84    | L2      | 107  | Run2 | WC   | Community-92 | 25         |
| Samp06    | L3      | 63   | Run1 | G8   | sorted   | 35         | Samp85    | L3      | 107  | Run2 | WC   | Community-93 | 25         |
| Samp07    | L1      | 100  | Run1 | G7   | sorted   | 35         | Samp86    | L4      | 107  | Run2 | WC   | Community-94 | 25         |
| Samp08    | L2      | 47   | Run1 | G16  | sorted   | 35         | Samp87    | L5      | 107  | Run2 | WC   | Community-95 | 25         |
| Samp09    | L2      | 47   | Run1 | G22  | sorted   | 35         | Samp88    | L2      | 86   | Run1 | G25  | sorted       | 35         |
| Samp10    | L1      | 34   | Run1 | G4   | sorted   | 35         | Samp89    | L3      | 61   | Run1 | G18  | sorted       | 35         |
| Samp11    | L1      | 99   | Run1 | G8   | sorted   | 35         | Samp90    | L3      | 63   | Run1 | G4   | sorted       | 35         |
| Samp12    | L5      | 44   | Run1 | G7   | sorted   | 35         | Samp91    | L3      | 63   | Run1 | G9   | sorted       | 35         |
| Samp13    | L3      | 100  | Run1 | G5   | sorted   | 35         | Samp99    | L1      | 0    | Run1 | WC   | Community_01 | 35         |
| Samp14    | L1      | 71   | Run1 | G4   | sorted   | 35         | Samp100   | L1      | 1    | Run1 | WC   | Community_02 | 25         |
| Samp15    | L2      | 44   | Run1 | G1   | sorted   | 35         | Samp101   | L2      | 1    | Run1 | WC   | Community_03 | 25         |
| Samp16    | L2      | 44   | Run1 | G24  | sorted   | 35         | Samp102   | L3      | 1    | Run1 | WC   | Community_04 | 25         |
| Samp17    | L2      | 44   | Run1 | G26  | sorted   | 35         | Samp103   | L4      | 1    | Run1 | WC   | Community_05 | 25         |
| Samp18    | L4      | 86   | Run1 | G13  | sorted   | 35         | Samp104   | L5      | 1    | Run1 | WC   | Community_06 | 25         |
| Samp19    | L5      | 71   | Run1 | G2   | sorted   | 35         | Samp105   | L1      | 8    | Run1 | WC   | Community_07 | 25         |
| Samp20    | L5      | 71   | Run1 | G4   | sorted   | 35         | Samp106   | L2      | 8    | Run1 | WC   | Community_08 | 25         |
| Samp21    | L1      | 99   | Run1 | G20  | sorted   | 35         | Samp107   | L3      | 8    | Run1 | WC   | Community_09 | 25         |
| Samp22    | R       | 85   | Run1 | G14  | sorted   | 35         | Samp108   | L4      | 8    | Run1 | WC   | Community_10 | 25         |
| Samp23    | L1      | 85   | Run1 | G5   | sorted   | 35         | Samp109   | L5      | 8    | Run1 | WC   | Community_11 | 25         |
| Samp24    | L1      | 85   | Run1 | G12  | sorted   | 35         | Samp110   | R       | 9    | Run1 | WC   | Community_12 | 25         |
| Samp25    | L1      | 85   | Run1 | G14  | sorted   | 35         | Samp111   | L1      | 26   | Run1 | WC   | Community_13 | 25         |

|        |    |    |      |     |              |    |         |    |     |      |     |              |    |
|--------|----|----|------|-----|--------------|----|---------|----|-----|------|-----|--------------|----|
| Samp26 | L3 | 85 | Run1 | G5  | sorted       | 35 | Samp112 | L2 | 26  | Run1 | WC  | Community_14 | 25 |
| Samp27 | L3 | 85 | Run1 | G12 | sorted       | 35 | Samp113 | L3 | 26  | Run1 | WC  | Community_15 | 25 |
| Samp28 | L3 | 85 | Run1 | G14 | sorted       | 35 | Samp114 | L4 | 26  | Run1 | WC  | Community_16 | 25 |
| Samp29 | L2 | 86 | Run1 | G9  | sorted       | 35 | Samp115 | L5 | 26  | Run1 | WC  | Community_17 | 25 |
| Samp34 | L3 | 61 | Run1 | G5  | sorted       | 35 | Samp116 | R  | 26  | Run1 | WC  | Community_18 | 25 |
| Samp35 | L3 | 99 | Run1 | G12 | sorted       | 35 | Samp117 | L1 | 27  | Run1 | WC  | Community_19 | 25 |
| Samp36 | L1 | 34 | Run1 | G19 | sorted       | 35 | Samp118 | L2 | 27  | Run1 | WC  | Community_20 | 25 |
| Samp37 | R  | 85 | Run1 | G33 | sorted       | 35 | Samp119 | L3 | 27  | Run1 | WC  | Community_21 | 25 |
| Samp38 | L1 | 85 | Run1 | G33 | sorted       | 35 | Samp120 | L4 | 27  | Run1 | WC  | Community_22 | 25 |
| Samp39 | L3 | 85 | Run1 | G33 | sorted       | 35 | Samp121 | L5 | 27  | Run1 | WC  | Community_23 | 25 |
| Samp40 | L2 | 86 | Run1 | G1  | sorted       | 35 | Samp122 | R  | 27  | Run1 | WC  | Community_24 | 25 |
| Samp41 | L5 | 55 | Run2 | WC  | Community_49 | 25 | Samp123 | L1 | 34  | Run1 | WC  | Community_25 | 25 |
| Samp42 | R  | 55 | Run2 | WC  | Community_50 | 25 | Samp124 | L2 | 34  | Run1 | WC  | Community_26 | 25 |
| Samp43 | L3 | 61 | Run2 | WC  | Community_51 | 25 | Samp125 | L3 | 34  | Run1 | WC  | Community_27 | 25 |
| Samp44 | L5 | 61 | Run2 | WC  | Community_52 | 25 | Samp126 | L4 | 34  | Run1 | WC  | Community_28 | 25 |
| Samp45 | L1 | 64 | Run2 | WC  | Community-53 | 25 | Samp127 | L5 | 34  | Run1 | WC  | Community_29 | 25 |
| Samp46 | L2 | 64 | Run2 | WC  | Community-54 | 25 | Samp128 | R  | 34  | Run1 | WC  | Community_30 | 25 |
| Samp47 | L3 | 64 | Run2 | WC  | Community-55 | 25 | Samp129 | L2 | 44  | Run1 | WC  | Community_31 | 25 |
| Samp48 | L4 | 64 | Run2 | WC  | Community-56 | 25 | Samp130 | L5 | 44  | Run1 | WC  | Community_32 | 25 |
| Samp49 | L5 | 64 | Run2 | WC  | Community-57 | 25 | Samp131 | L1 | 47  | Run1 | WC  | Community_33 | 25 |
| Samp50 | R  | 64 | Run2 | WC  | Community-58 | 25 | Samp132 | L2 | 47  | Run1 | WC  | Community_34 | 25 |
| Samp51 | L1 | 65 | Run2 | WC  | Community-59 | 25 | Samp133 | L3 | 47  | Run1 | WC  | Community_35 | 25 |
| Samp52 | L2 | 65 | Run2 | WC  | Community-60 | 25 | Samp134 | L4 | 47  | Run1 | WC  | Community_36 | 25 |
| Samp53 | L3 | 65 | Run2 | WC  | Community-61 | 25 | Samp135 | L5 | 47  | Run1 | WC  | Community_37 | 25 |
| Samp54 | L4 | 65 | Run2 | WC  | Community-62 | 25 | Samp136 | R  | 47  | Run1 | WC  | Community_38 | 25 |
| Samp55 | L5 | 65 | Run2 | WC  | Community-63 | 25 | Samp137 | L1 | 48  | Run1 | WC  | Community_39 | 25 |
| Samp56 | R  | 65 | Run2 | WC  | Community-64 | 25 | Samp138 | L2 | 48  | Run1 | WC  | Community_40 | 25 |
| Samp57 | L1 | 72 | Run2 | WC  | Community-65 | 25 | Samp139 | L3 | 48  | Run1 | WC  | Community_41 | 25 |
| Samp58 | L2 | 72 | Run2 | WC  | Community-66 | 25 | Samp140 | L4 | 48  | Run1 | WC  | Community_42 | 25 |
| Samp59 | L3 | 72 | Run2 | WC  | Community-67 | 25 | Samp141 | L5 | 48  | Run1 | WC  | Community_43 | 25 |
| Samp60 | L4 | 72 | Run2 | WC  | Community-68 | 25 | Samp142 | R  | 48  | Run1 | WC  | Community_44 | 25 |
| Samp61 | L5 | 72 | Run2 | WC  | Community-69 | 25 | Samp143 | L1 | 55  | Run1 | WC  | Community_45 | 25 |
| Samp62 | R  | 72 | Run2 | WC  | Community-70 | 25 | Samp144 | L2 | 55  | Run1 | WC  | Community_46 | 25 |
| Samp63 | L1 | 89 | Run2 | WC  | Community-71 | 25 | Samp145 | L3 | 55  | Run1 | WC  | Community_47 | 25 |
| Samp64 | L2 | 89 | Run2 | WC  | Community-72 | 25 | Samp146 | L4 | 55  | Run1 | WC  | Community_48 | 25 |
| Samp65 | L3 | 89 | Run2 | WC  | Community-73 | 25 | Samp154 | L1 | 99  | Run2 | G38 | sorted       | 35 |
| Samp66 | L4 | 89 | Run2 | WC  | Community-74 | 25 | Samp155 | L1 | 63  | Run2 | G2  | sorted       | 35 |
| Samp67 | L5 | 89 | Run2 | WC  | Community-75 | 25 | Samp156 | L1 | 63  | Run2 | G3  | sorted       | 35 |
| Samp68 | R  | 89 | Run2 | WC  | Community-76 | 25 | Samp157 | L1 | 63  | Run2 | G11 | sorted       | 35 |
| Samp69 | L1 | 90 | Run2 | WC  | Community-77 | 25 | Samp158 | L1 | 100 | Run2 | G3  | sorted       | 35 |
| Samp70 | L2 | 90 | Run2 | WC  | Community-78 | 25 | Samp159 | L1 | 100 | Run2 | G4  | sorted       | 35 |
| Samp71 | L3 | 90 | Run2 | WC  | Community-79 | 25 | Samp160 | L1 | 100 | Run2 | G24 | sorted       | 35 |
| Samp72 | L4 | 90 | Run2 | WC  | Community-80 | 25 | Samp161 | L2 | 47  | Run2 | G33 | sorted       | 35 |
| Samp73 | L5 | 90 | Run2 | WC  | Community-81 | 25 | Samp162 | L2 | 47  | Run2 | G79 | sorted       | 35 |
| Samp74 | R  | 90 | Run2 | WC  | Community-82 | 25 | Samp163 | L2 | 26  | Run2 | G33 | sorted       | 35 |
| Samp75 | L1 | 97 | Run2 | WC  | Community-83 | 25 | Samp164 | L5 | 47  | Run2 | G3  | sorted       | 35 |
| Samp76 | L2 | 97 | Run2 | WC  | Community-84 | 25 | Samp165 | L3 | 100 | Run2 | G18 | sorted       | 35 |
| Samp77 | L3 | 97 | Run2 | WC  | Community-85 | 25 | Samp166 | L3 | 58  | Run2 | G19 | sorted       | 35 |
| Samp78 | L4 | 97 | Run2 | WC  | Community-86 | 25 | Samp167 | L3 | 58  | Run2 | G24 | sorted       | 35 |
| Samp79 | L5 | 97 | Run2 | WC  | Community-87 | 25 | Samp168 | R  | 107 | Run2 | WC  | Community_96 | 25 |

648

#### 649 [Step 4: Taxonomic classification](#)

650 To perform taxonomic classification of the amplicon sequence variants (ASVs), feature classifiers  
651 were trained with the q2-feature-classifier provided by the QIIME2 using the instructions from the  
652 developers (7). To this end, the SILVA database v132 (9) was used as a reference database and  
653 the primers (Pro341F and Pro805R) were used to trim the reference database. After the  
654 taxonomic classification, samples amplified for 25 or 35 PCR cycles were merged using q2-  
655 feature-table merge (7).

656

#### 657 [Step 5: Removing contaminants and setting relative abundance thresholds based on positive and negative](#) 658 [controls.](#)

659 A two-fold approach was used to determine which ASVs should be removed based on negative  
660 (two sets) and positive controls (one set). For the first set of negative controls, 14 DNA extractions  
661 of the sheath buffer were sequenced to account for potential contamination during the DNA

662 extraction. The second set of negative controls consisted of one extraction using the Chelex 100  
 663 solution as template for the PCR. All ASVs present in the sheath buffer DNA extracts or Chelex  
 664 100 solution were removed from the analysis. As a positive control, the ZymoBIOMICS™  
 665 Microbial Community Standard (Zymo Research Europe GmbH Freiburg, Germany) was  
 666 sequenced in triplicate (Fig. S6.1). Then, the ASVs from the eight different species were identified  
 667 as present in this community using BLAST (10). BLAST used as the q2-feature-classifier was  
 668 unable to determine the phylogeny of all ASVs present in the ZymoBIOMICS™ Microbial  
 669 Community Standard at the species level. The highest relative abundance of ASVs that did not  
 670 belong to the ZymoBIOMICS™ Microbial Community Standard ASVs was 0.1%. Therefore, every  
 671 ASV with a relative abundance of 0.1% or lower was removed from the 16S rRNA gene amplicon  
 672 sequencing dataset.

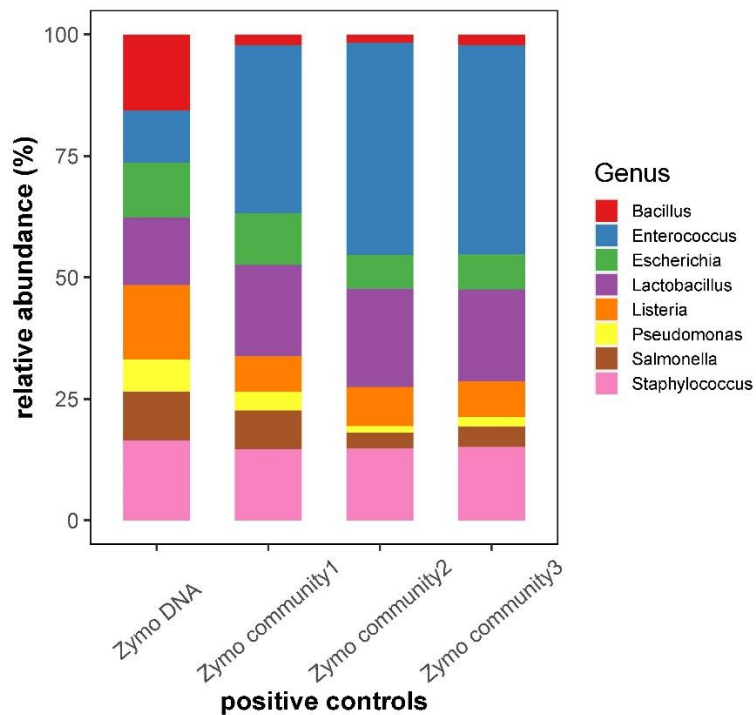

673  
 674 **Figure S6.1** Positive control for 16S rRNA gene amplicon sequencing. The ZymoBIOMICS™ Microbial  
 675 Community Standard ASVs were used for this purpose (left column: data provided by the company) and  
 676 three sets were run in parallel in accordance with the protocol described in this paper. The highest relative  
 677 abundance of other strains not belonging to the standard was 0.1%. Therefore, every ASV with a relative  
 678 abundance of 0.1% or lower was removed from the 16S rRNA gene amplicon sequencing dataset.  
 679

680 **Step 6: Visualization of the amplicon sequencing data.**

681 We used the 'phyloseq' R package to visualize the taxonomic composition of the different samples  
682 used for 16S rRNA gene amplicon sequencing, in accordance with the instructions of the  
683 developers (11).

684

685

686 **S7: Stability of communities under the influence of  $RC_{10}$ ,  $RC_{50}$  and  $RC_{80}$**

687 The stability properties of constancy, resistance  $RS$  and recovery  $RV$  were calculated for all SCs  
688 per community per phase and reactor in accordance with previous studies (1, 12). Community  
689 stability was tested during Insular I phase,  $RC_{10}$ ,  $RC_{50}$ ,  $RC_{80}$  and Insular II phase based on the  
690 Canberra distance measure.

691

692 **Step 1: Constancy spaces for determining changes in microbial community composition caused by increasing**  
693  **$RC$**

694 Constancy space reveals the fluctuation of community structure without the influence of external  
695 disturbance, thus indicating the inherent community variation. To investigate whether the shift in  
696 recycling rates  $RC$  caused essential changes in microbial community compositions, and if so, to  
697 what extent, the deviations of the community structures of L1-L5 and of R from either the inoculum  
698 or start and end of the recycling phases were calculated using the Canberra distance (Fig. 2b; R-  
699 script v1.0, GitHub: <https://github.com/fcentler/EcologicalStabilityPropertiesComputation>). When  
700 the deviation of the community structure leaves the constancy space, the community is defined  
701 as unstable (1, 12). The constancy space can be calculated in accordance with the procedure  
702 described by Liu et al. (12). Briefly, the relative cell abundance data of all SCs of all samples from  
703 the balanced periods per phase and per reactor were included in the calculation of Canberra  
704 distances. This resulted, first, in an average sampling point, which described the mean of all  
705 samples. Second, Canberra distances from all samples to the average sampling point were  
706 calculated. Third, the constancy space was defined by determining the maximum Canberra  
707 distance per phase, which was possible due to the undisturbed balanced phases from which the  
708 samples were taken from. The mean value of the constancy space per phase was calculated for  
709 each of the five local communities L1-L5 (dashed lines in Fig. 2b).

710 A small value between 0 and 1 mirrors only small intrinsic fluctuations of a community and thus  
711 high constancy. Increased recycling rates resulted in a smaller constancy space of community  
712 structures of L1-L5, while no recycling allowed for higher fluctuations and a larger constancy



713 space. The mean values of constancy spaces for the local communities L1-L5 were 0.44, 0.34,  
 714 0.26 and 0.27 for phases 1 to 4, respectively. In the Insular II phase, when recycling rates were  
 715 stopped, the constancy values were similarly high as in Insular I phase (0.43, Table S7.1). The  
 716 phase-to-phase variation was confirmed by Wilcoxon test ( $p = 0.008, 0.008, 0.841$  and  $0.008$   
 717 respectively), with the exception of that between RC<sub>50</sub> and RC<sub>80</sub>.

718

719 **Table S7.1** Constancy space calculated based on Canberra distance.

| reactor   | Insular I   | RC <sub>10</sub> | RC <sub>50</sub> | RC <sub>80</sub> | Insular II  |
|-----------|-------------|------------------|------------------|------------------|-------------|
| L1        | 0.44        | 0.33             | 0.26             | 0.27             | 0.50        |
| L2        | 0.46        | 0.34             | 0.25             | 0.32             | 0.48        |
| L3        | 0.41        | 0.33             | 0.28             | 0.27             | 0.37        |
| L4        | 0.46        | 0.34             | 0.28             | 0.24             | 0.39        |
| L5        | 0.43        | 0.37             | 0.22             | 0.25             | 0.41        |
| mean ± sd | 0.44 ± 0.02 | 0.34 ± 0.02      | 0.26 ± 0.02      | 0.27 ± 0.03      | 0.43 ± 0.06 |
| R         | 0.28        | 0.25             | 0.22             | 0.26             | 0.39        |

720

721

722 **Step 2: Resistance RS and recovery RV for determining changes in microbial community composition caused**  
 723 **by increasing RC**

724 The values for resistance RS and recovery RV were used to determine whether microbiomes  
 725 change in composition between the phases, that is, Insular I phase to RC<sub>10</sub>, RC<sub>10</sub> to RC<sub>50</sub>, RC<sub>50</sub>  
 726 to RC<sub>80</sub> and RC<sub>80</sub> to Insular II phase. The values were calculated by the degree of deviation from  
 727 the starting point (resistance RS) and the ability of the microbiome to return to the starting point  
 728 (recovery RV). The deviation from the inoculum (day 0) or from the respective endpoints of  
 729 previous balanced phases (days 26, 47, 64, and 89, respectively; Fig. 2b) were used to calculate  
 730 the deviations that occurred. These phase-to-phase variations were confirmed by significance  
 731 testing (Wilcoxon test,  $p = 0.0079, 0.1508$  and  $0.008$  respectively; Fig. S7.2). The RS value was  
 732 lowest during the shift from Insular I phase to RC<sub>10</sub> (mean  $0.46 \pm 0.05$  for L1-L5) suggesting the  
 733 greatest changes in community composition under these conditions. The shifts RC<sub>10</sub> to RC<sub>50</sub> and  
 734 RC<sub>50</sub> to RC<sub>80</sub> showed the highest RS (mean  $0.57 \pm 0.03$  and  $0.60 \pm 0.03$ , respectively, for L1-L5)  
 735 and therefore indicated small changes of microbiome structures. We did not observe much  
 736 changes in RV in all phases and for all communities (Table S7.2).

737

738 **Table. S7.2** Resistance (RS) and recovery (RV) for the shifts between phases in L1-L5 and R based on  
 739 Canberra distance.

| reactor | Insular I to RC <sub>10</sub> |      | RC <sub>10</sub> to RC <sub>50</sub> |      | RC <sub>50</sub> to RC <sub>80</sub> |      | RC <sub>80</sub> to Insular II |      |
|---------|-------------------------------|------|--------------------------------------|------|--------------------------------------|------|--------------------------------|------|
|         | RS                            | RV   | RS                                   | RV   | RS                                   | RV   | RS                             | RV   |
| L1      | 0.52                          | 0.06 | 0.57                                 | 0.23 | 0.61                                 | 0.03 | 0.44                           | 0.19 |



|               |                 |                 |                 |                 |                 |                 |                 |                 |
|---------------|-----------------|-----------------|-----------------|-----------------|-----------------|-----------------|-----------------|-----------------|
| L2            | 0.41            | 0.02            | 0.53            | 0               | 0.61            | 0.01            | 0.52            | 0.11            |
| L3            | 0.47            | 0.02            | 0.6             | 0               | 0.6             | 0.14            | 0.52            | 0.04            |
| L4            | 0.39            | 0.07            | 0.59            | 0.14            | 0.55            | 0.12            | 0.5             | 0.12            |
| L5            | 0.49            | 0.01            | 0.58            | 0.01            | 0.62            | 0.02            | 0.5             | 0.09            |
| mean $\pm$ sd | 0.46 $\pm$ 0.05 | 0.04 $\pm$ 0.03 | 0.57 $\pm$ 0.03 | 0.08 $\pm$ 0.10 | 0.60 $\pm$ 0.03 | 0.06 $\pm$ 0.06 | 0.50 $\pm$ 0.03 | 0.11 $\pm$ 0.05 |
| R             | 0.57            | 0.18            | 0.67            | 0.08            | 0.6             | 0.01            | 0.53            | 0.15            |

740

741

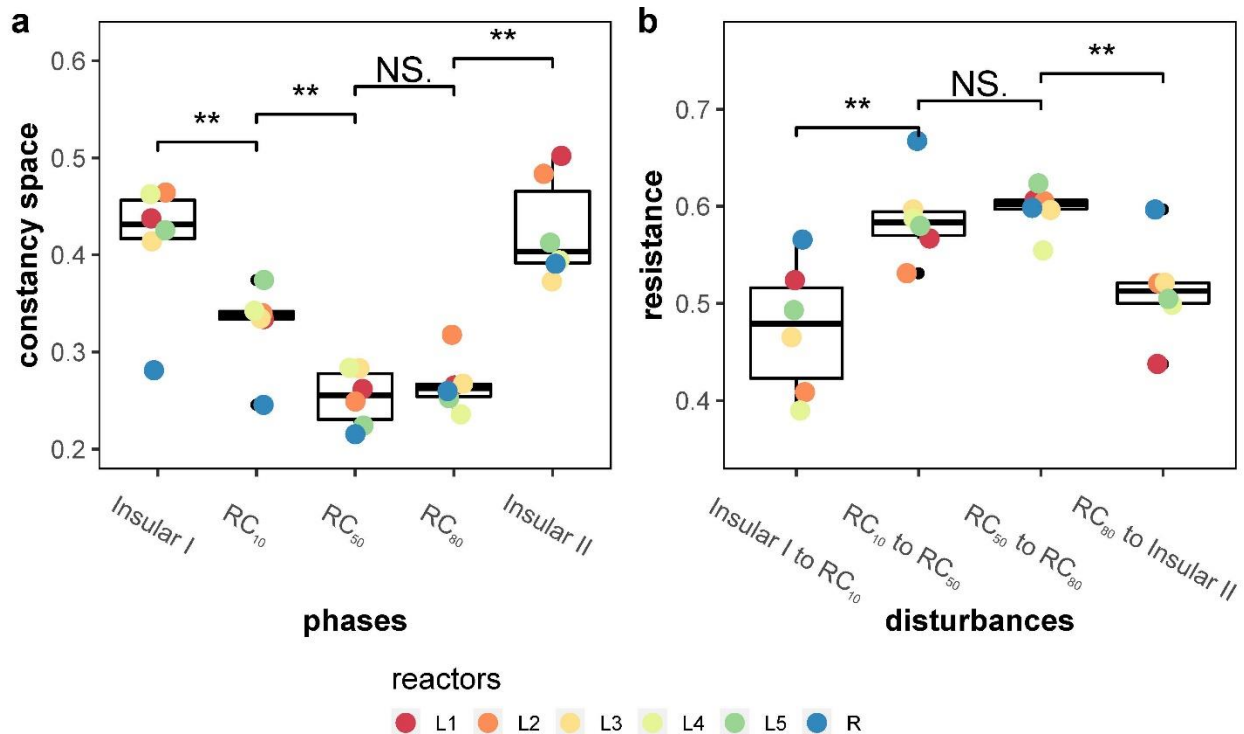

742

743 **Figure S7.1** The stability properties of **a)** constancy and **b)** resistance RS were calculated for the local  
 744 microbiomes L1-L5 and the regional pool R. A small constancy space marks a high constancy and high  
 745 resistance values mark a high resistance behaviour. The stars indicate a significant difference in stability  
 746 properties of local communities L1-L5 between two successive phases (Wilcoxon;  $*p \leq 0.05$  and  $**p \leq$   
 747 0.01).

748

749

## 750 [S8: Analysis of microbial community composition](#)

### 751 [Step 1: Visualization of microbial community composition](#)

752 The microbial community composition (i.e. fingerprint) was determined by flow cytometry. The  
 753 variations in the composition of the six communities were shown by the relative cell abundance  
 754 and absolute cell abundance variations for the dominant SCs (Figs. S8.1, S8.2; dominant SC:

755 relative cell abundance  $> 1/\text{number of gates} = 1.25\%$  or absolute cell abundance  $>$  cell number  
 756 of total community/number of gates).  
 757 The fate of all dominant SCs through time (Fig. S8.3) was shown based on relative cell abundance.  
 758 Using the R package 'vegan' (13), the dissimilarity of the samples was shown as NMDS plots  
 759 based on the Bray-Curtis distance measure calculated based on relative cell abundance in Fig.  
 760 2a.

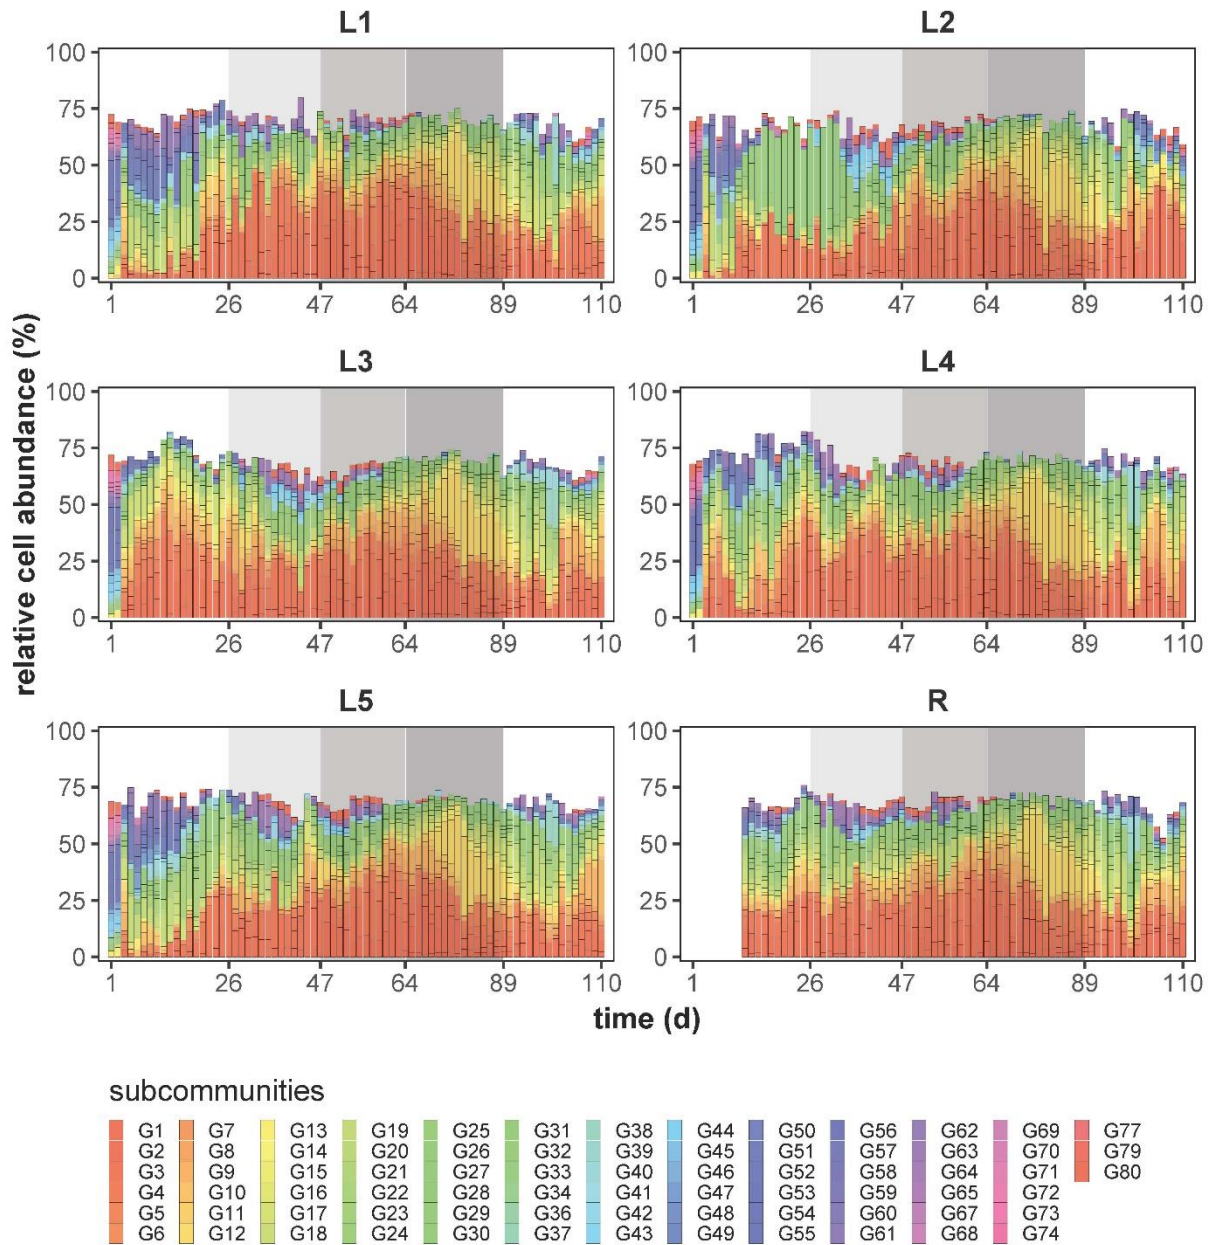

761  
 762 **Figure S8.1** The relative cell abundance distribution per dominant SC and reactors (relative abundance  $>$   
 763  $1/\text{number of gates} = 1.25\%$  in the corresponding community sample) over time. Each SC is represented

764 by a different colour. The relative abundance of each SC is given in %. The shaded areas represent different  
 765 phases with changed *RC*.

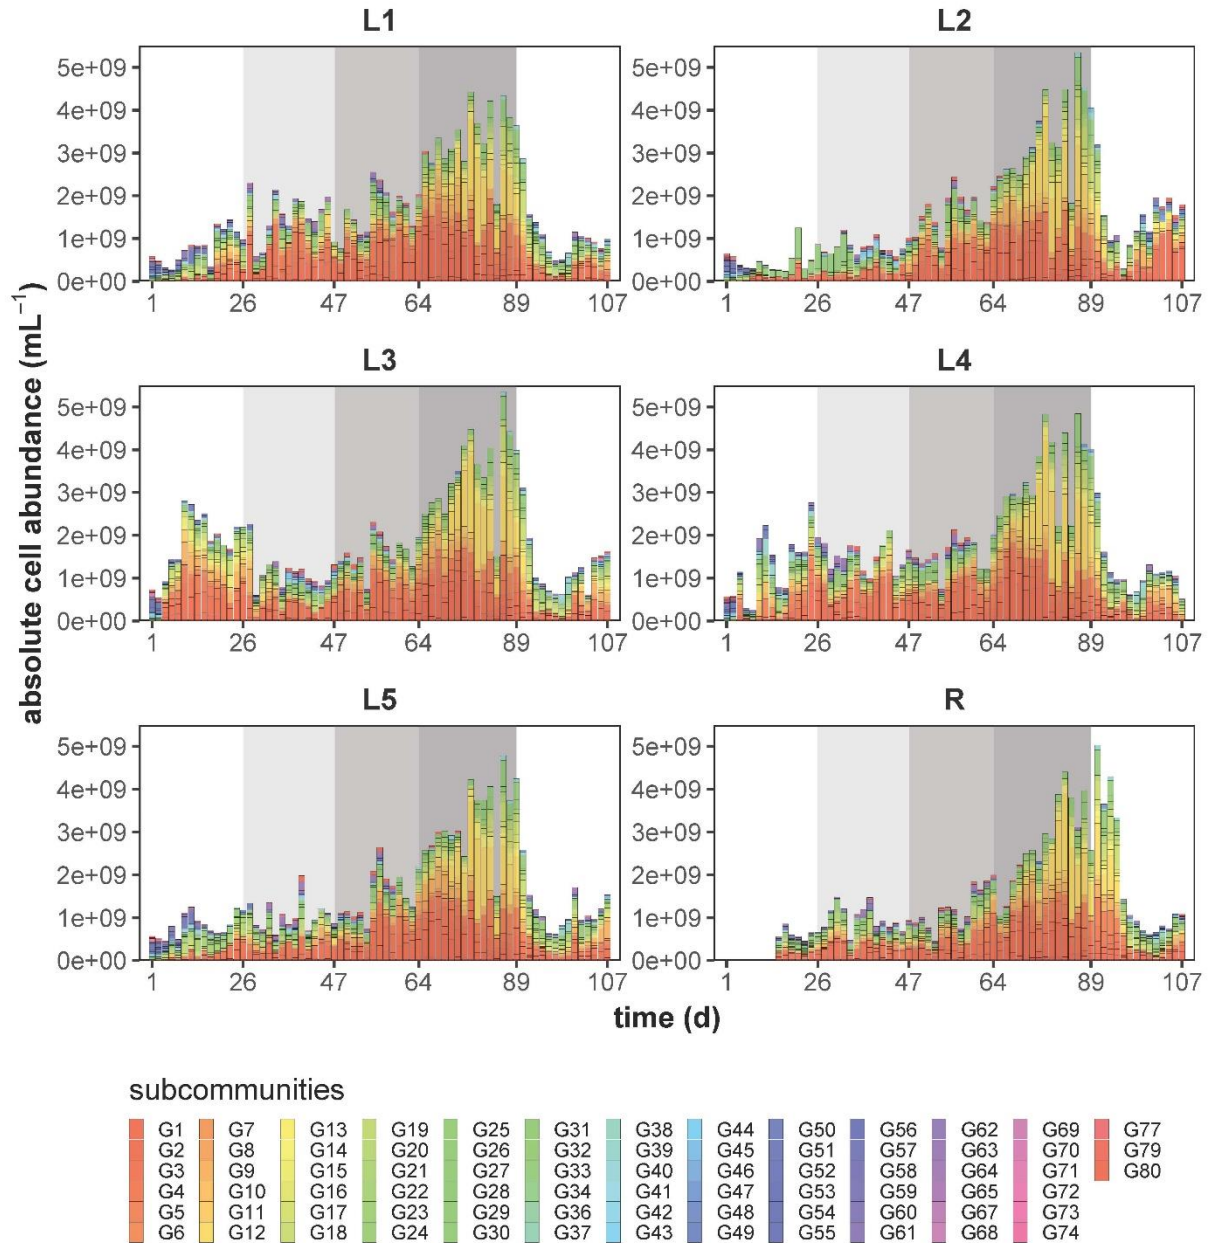

766  
 767 **Figure S8.2** The absolute cell abundance distribution per dominant SCs and reactors (absolute cell  
 768 abundance > cell number of total community/number of gates) over time. Each SC is represented by a  
 769 different colour. The absolute cell abundance of each SC is given in cells mL<sup>-1</sup>. The shaded areas represent  
 770 different phases with changed *RC*.  
 771

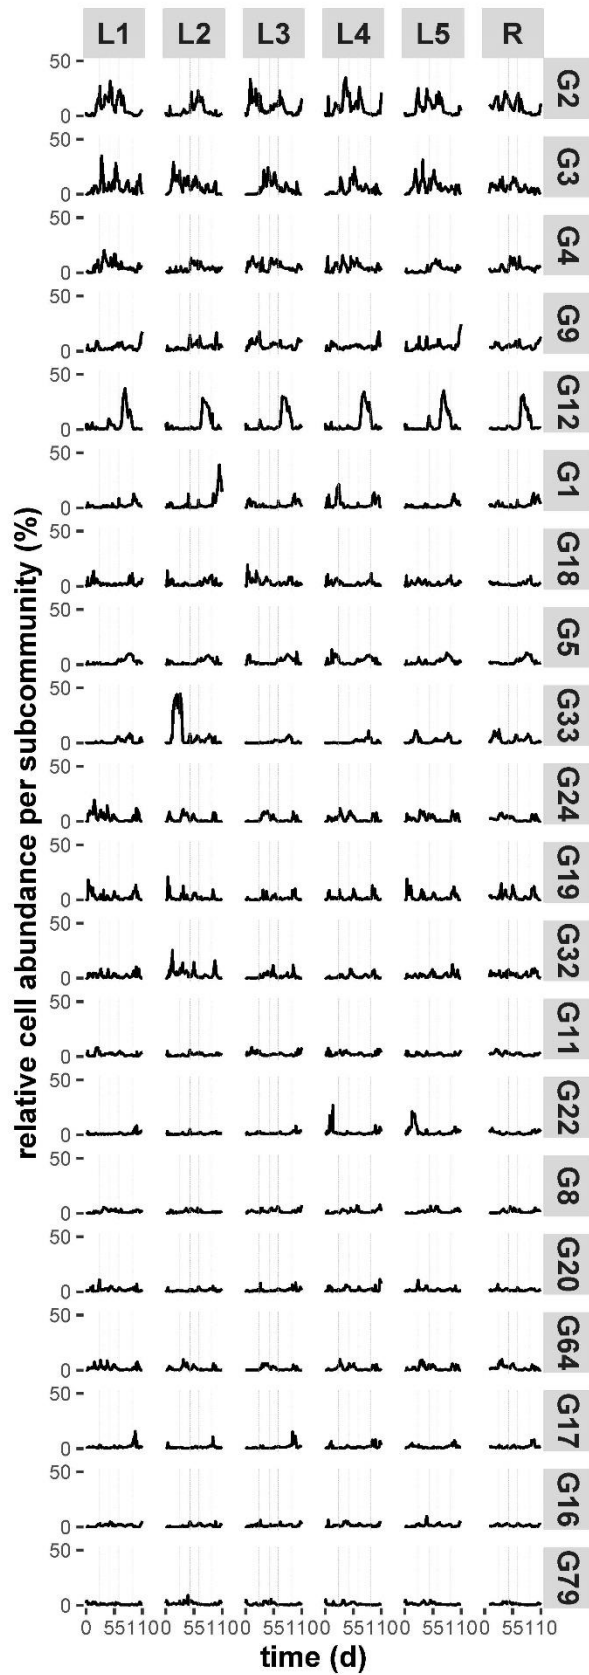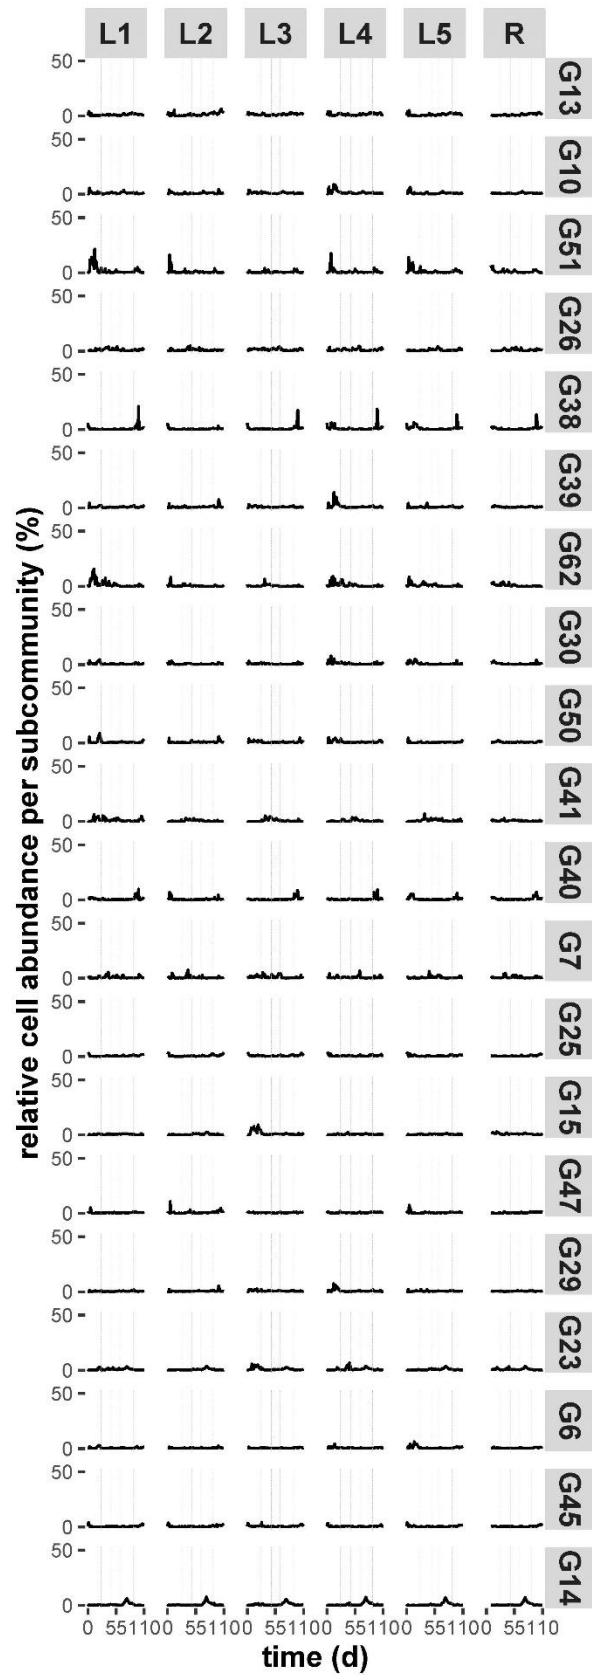

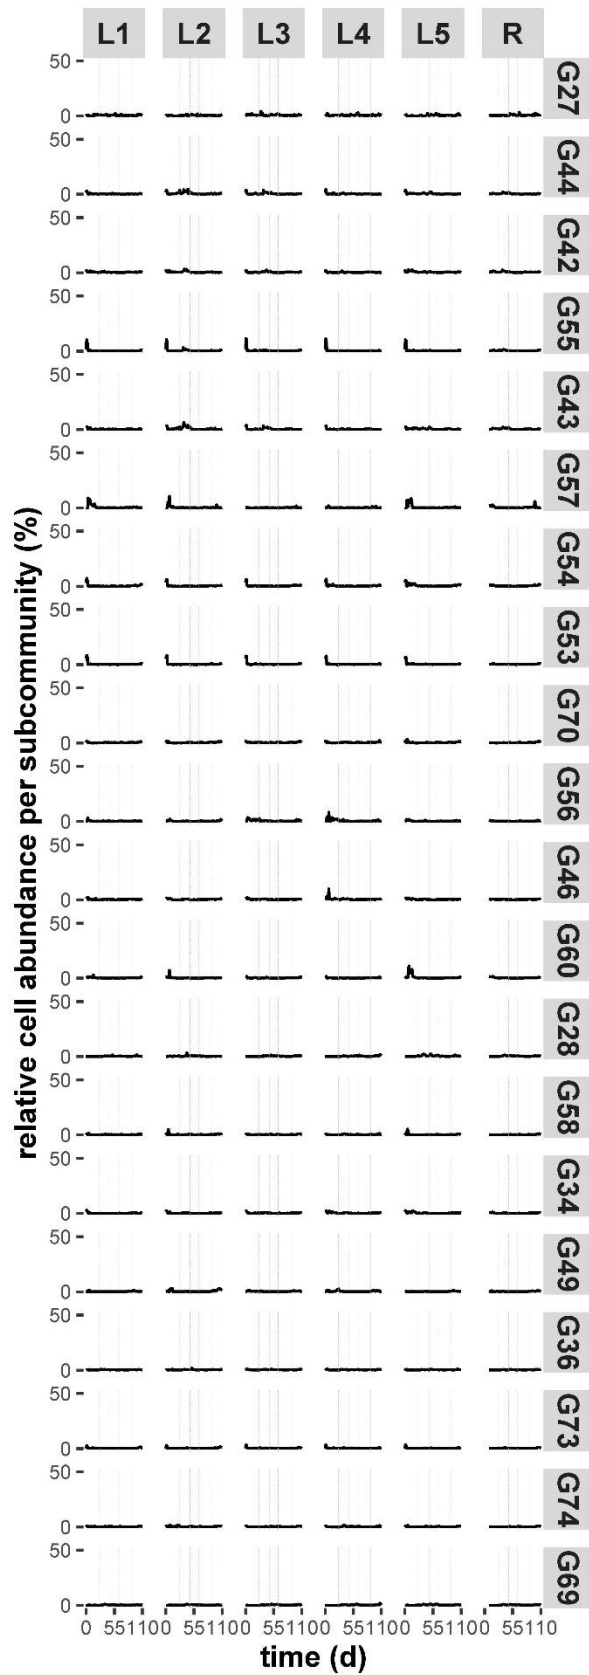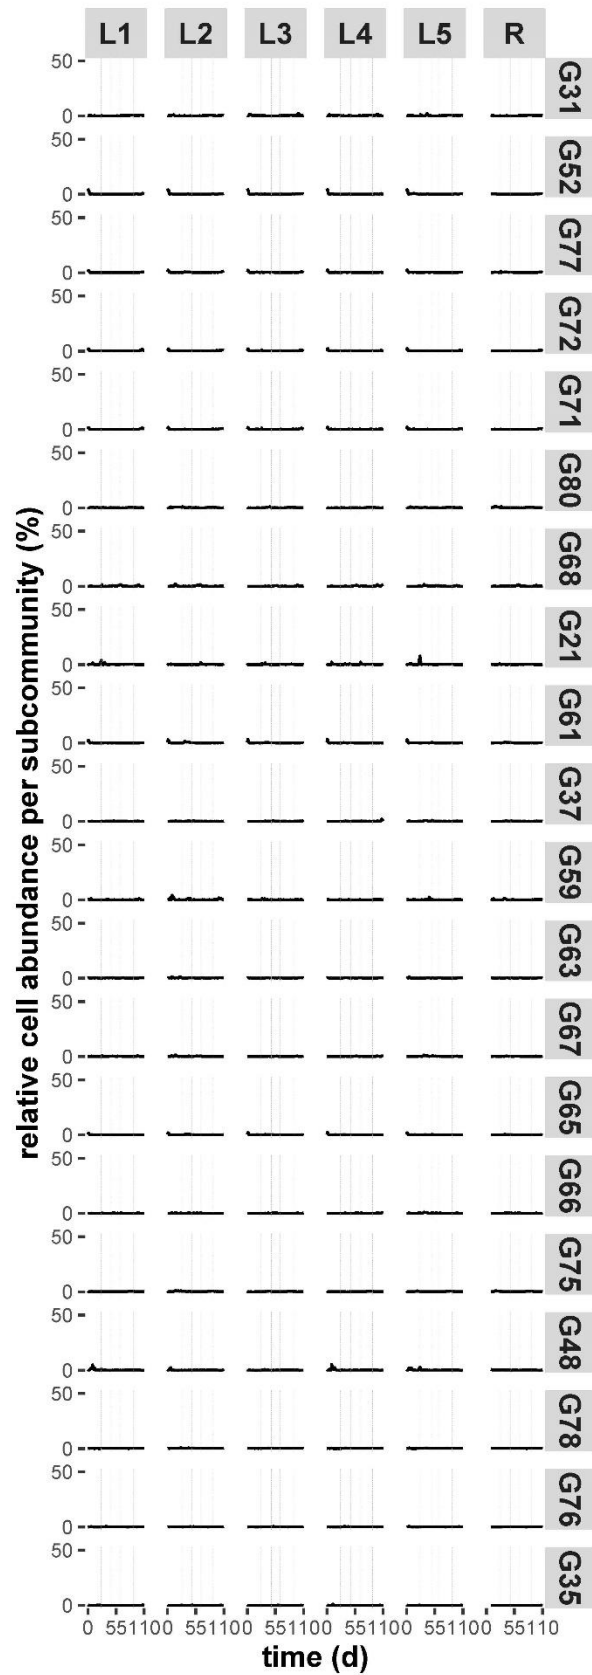



774 **Figure S8.3** The fate of SCs according to relative cell abundance. SCs are ranked in descending order of  
775 mean relative cell abundance over the whole experiment. The dashed lines indicate the different phases  
776 with changed *RC*.

777 **Step 2: Comparison of effluents between local communities L1-L5 and the regional pool R**

778 A PERMANOVA (permutational multivariate analysis of variance) was applied using the R  
779 package 'vegan' (13) to determine the difference between the effluents from the local communities  
780 L1-L5 and the regional pool R. We wanted to know whether the microbial composition of R was  
781 similar to the sum of effluents from L1-L5. Briefly, samples from day 12 to day 23 (Insular I phase)  
782 were used. For each day, the values of absolute cell abundance per SC from L1-L5 were summed  
783 up and then normalized to relative cell abundance to simulate the sum of L1-L5 effluents. The  
784 sum of L1-L5 effluents was compared with the R community of the same days (permutations =  
785 9999, method = 'bray'). The results showed that the composition of the R community was  
786 divergent from that of L1-L5 (PERMANOVA,  $F = 8.452$ ,  $p = 0.0002$ ,  $R^2 = 0.346$ ). Thus, the  
787 composition of the R community was not only determined by the immigration from L1-L5, but also  
788 by its unique operational parameters (e.g., dilution time, no nutrient feeding).

789 **Step 3:  $\alpha$ -,  $\gamma$ - and  $\beta$ -diversity values of microbial communities L1-L5 and R**

790 The  $\alpha$ -diversity was determined by counting the numbers of dominant SCs (relative cell  
791 abundance  $> 1/\text{number of gates} = 1.25\%$ , Fig. S8.4) per local community L1-L5 and the regional  
792 pool R.

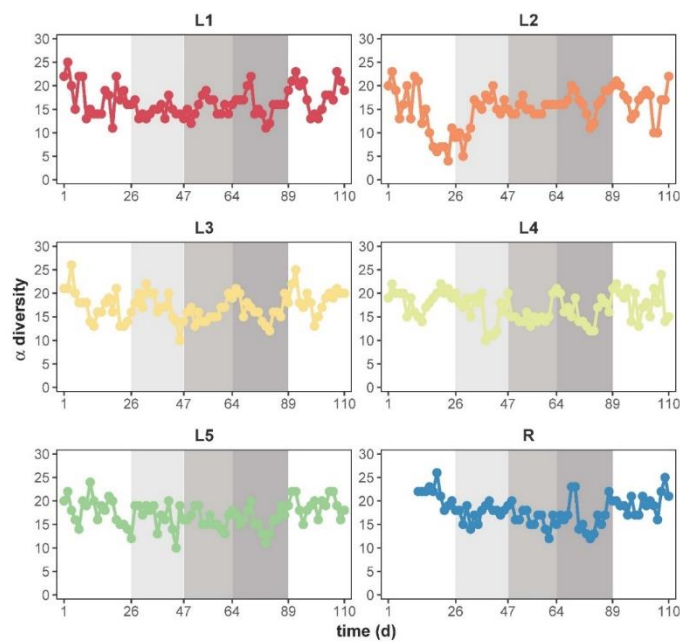

793 **Figure S8.4**  $\alpha$ -diversity of the composition of the five local communities L1-L5 and the regional pool R. The  
794  $\alpha$ -diversity was determined by counting the numbers of dominant SCs (relative cell abundance  $> 1/\text{number}$   
795 of gates = 1.25%) in each community. The color indicates the respective community as specified in Fig. 1.  
796 The shaded areas represent different phases with changed  $RC$ .

797

798 The  $\gamma$ -diversity was determined by counting the numbers of SCs among a total of 80 SCs that  
799 were dominant (relative cell abundance  $> 1/\text{number}$  of gates = 1.25%) in at least one local  
800 community within the whole metacommunity, which was expressed as the richness of SCs in the  
801 metacommunity. The  $\gamma$ -diversity showed remarkable phase-to-phase variation (Wilcoxon test,  $p$   
802 =  $3.416 \times 10^{-4}$ ,  $6.258 \times 10^{-4}$ , 0.045,  $3.605 \times 10^{-4}$ , respectively; Fig. S8.5). The  $\gamma$ -diversity declined  
803 from  $39.73 \pm 3.17$  SCs in Insular I phase to  $18.8 \pm 3.85$  SCs in  $RC_{80}$  and increased again to  $33.11$   
804  $\pm 3.62$  SCs in Insular II phase (Table 1). Thus, the  $\gamma$ -diversity decreased with increasing  $RC$   
805 values, but recovered to a level when the recycling flow was stopped.

806

807

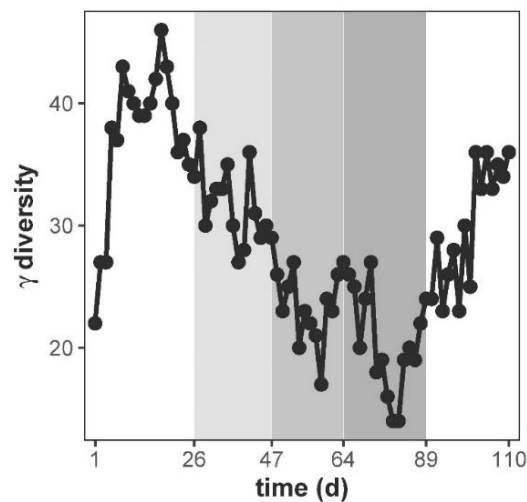

808 **Figure S8.5**  $\gamma$ -diversity of the metacommunity composed of five local communities (L1-L5). The  $\gamma$ -diversity  
809 was determined by counting the numbers of SCs among a total of 80 SCs that were dominant (relative cell  
810 abundance  $> 1/\text{number}$  of gates = 1.25%) in at least one local community. The shaded areas represent  
811 different phases with changed  $RC$ .

812

813 The  $\beta$ -diversity was computed as the number of unique dominant SCs, which were not shared by  
814 pairwise samples. Intra-community  $\beta$ -diversity compared samples from successive time points  
815 per reactor (Fig. 3a), while inter-community  $\beta$ -diversity compared samples from the same time  
816 point but from different reactors (Fig. 3b). Significant differences of intra-community  $\beta$ -diversity



817 between RC<sub>50</sub> and zero or low recycling phases were found ( $p = 5.505 \times 10^{-5}$  for Insular I,  
818  $8.016 \times 10^{-4}$  for RC<sub>10</sub>,  $1.625 \times 10^{-7}$  for Insular II), as well as between RC<sub>80</sub> and these phases  
819 respectively ( $p = 3.737 \times 10^{-8}$  for Insular I,  $1.753 \times 10^{-6}$  for RC<sub>10</sub>,  $1.983 \times 10^{-11}$  for Insular II). Wilcoxon  
820 test also showed significant differences of inter-community  $\beta$ -diversity between successive  
821 phases for L vs. L ( $p = 3.848 \times 10^{-14}$ ,  $2.2 \times 10^{-16}$ ,  $1.033 \times 10^{-8}$ ,  $2.2 \times 10^{-16}$ ) and L vs. R ( $p = 3.203 \times 10^{-8}$ ,  
822  $5.086 \times 10^{-10}$ ,  $4.838 \times 10^{-10}$ ,  $3.203 \times 10^{-8}$ ,  $2.2 \times 10^{-16}$ ). A summary of  $\alpha$ -,  $\gamma$ - and  $\beta$ -diversity values is  
823 shown in Table 1.

824 Drift events were calculated from balanced periods when the temporal community composition  
825 variation (i.e. intra-community  $\beta$ -diversity) was higher than a defined threshold (Fig. 3a and Table  
826 S8.1). The threshold was set to 8.76 and was calculated as the mean value for intra-community  
827  $\beta$ -diversity of L1-L5 of the Insular I phase during the balanced periods. To investigate which  
828 microorganisms were involved in the drift events, we sorted the relevant SCs that massively  
829 changed their relative cell abundance. After cell sorting, 16S rRNA gene sequencing analysis was  
830 performed (Supplementary Information S9). We studied three drift events: drift1 (RC<sub>10</sub>) in L2 and  
831 L5 at day 47, drift2 (RC<sub>50</sub>) in L3 and L5 at day 61 and drift3 (Insular II) in L1 and L3 at day 100.  
832 For comparison of community states between before and after the drifts, day 44, day 58 and day  
833 99 were taken as before-drift community states, respectively, for drift1, 2 and 3 (Table S8.2).

834  
835 **Table S8.1** Drifts occurring on certain days in local communities L1-L5. The values showed the intra-  
836 community  $\beta$ -diversity between two successive time points. The drifts were identified by intra-community  
837  $\beta$ -diversity values being above a threshold of  $> 8.76$  (i.e. mean intra-community  $\beta$ -diversity value during  
838 the balanced periods of Insular I phase of all five local communities). A dash (-) means that no drift occurred  
839 in the respective communities at the time. The drifts in bold were chosen for cell sorting (Supplementary  
840 Information S9).

| time<br>(d) | Insular I |    |    |    |    |    |    |    |    |    |    | RC <sub>10</sub> |    |    |    |    |    |    | RC <sub>50</sub> |           |    | RC <sub>80</sub> |    | Insular II |    |    |    |    |    |           |     |     |     |     |     |     |
|-------------|-----------|----|----|----|----|----|----|----|----|----|----|------------------|----|----|----|----|----|----|------------------|-----------|----|------------------|----|------------|----|----|----|----|----|-----------|-----|-----|-----|-----|-----|-----|
|             | 8         | 9  | 12 | 13 | 14 | 15 | 16 | 19 | 20 | 21 | 23 | 26               | 34 | 35 | 36 | 40 | 41 | 43 | 44               | 47        | 58 | 61               | 62 | 63         | 76 | 89 | 97 | 98 | 99 | 100       | 103 | 104 | 105 | 106 | 107 | 110 |
| L1          | -         | -  | 10 | 10 | 13 | -  | -  | 19 | 15 | -  | 9  | 20               | -  | -  | -  | -  | 9  | 9  | -                | -         | 9  | -                | -  | -          | -  | 9  | -  | -  | 15 | <b>20</b> | 9   | -   | -   | 10  | 10  | 12  |
| L2          | 19        | 15 | 11 | 9  | 11 | -  | -  | -  | -  | -  | -  | -                | 13 | 11 | -  | -  | 11 | -  | 15               | <b>24</b> | -  | 10               | 10 | 10         | 11 | -  | 11 | -  | 19 | 9         | 19  | 10  | -   | 9   | -   | 9   |
| L3          | -         | -  | -  | -  | -  | -  | -  | -  | 12 | 12 | 11 | -                | -  | 16 | -  | 9  | 9  | -  | -                | -         | -  | <b>18</b>        | -  | -          | -  | -  | -  | 15 | -  | <b>20</b> | 20  | 15  | -   | -   | -   | 14  |
| L4          | 13        | 15 | 13 | 13 | -  | 11 | 15 | 12 | -  | 9  | -  | 9                | 9  | 10 | 12 | -  | -  | 14 | 14               | 12        | -  | 11               | -  | -          | -  | -  | -  | 15 | -  | 17        | 13  | 12  | -   | 20  | 16  | 9   |
| L5          | 9         | 10 | 10 | 9  | 13 | 11 | 11 | 10 | -  | -  | -  | -                | -  | 10 | -  | 12 | 10 | 10 | 13               | <b>15</b> | -  | <b>13</b>        | -  | -          | -  | -  | -  | 9  | -  | 16        | 9   | 9   | 10  | 11  | -   | 10  |

841  
842  
843  
844  
845

846

847 **Table S8.2** Relative cell abundance of SCs (%) before and after drift1 (day 47, RC<sub>10</sub>) in L2 and L5, drift2  
 848 (day 61, RC<sub>50</sub>) in L3 and L5, and drift3 (day 100, Insular II) in L1 and L3. The pink background of squares  
 849 marks the dominance of the SCs (relative cell abundance > 1/number of gates = 1.25%). A dash (-) means  
 850 that the SC was not involved in the drift in the corresponding reactor. The SCs in bold were chosen for cell  
 851 sorting (Supplementary Information S9).

|  | reactor | state    | G1                | G3   | G4     | G7   | G8  | G10 | G11 | G13 | G16 | G18 | G19 | G20 | G22 | G23 | G24  | G26  | G27 | G32 | G33 | G41 | G42  | G43 | G47 | G50  | G59 | G62 | G64 | G79 |     |
|--|---------|----------|-------------------|------|--------|------|-----|-----|-----|-----|-----|-----|-----|-----|-----|-----|------|------|-----|-----|-----|-----|------|-----|-----|------|-----|-----|-----|-----|-----|
|  |         |          | drift 1 (day 47)  | L2   | before | 12.6 | -   | 1.0 | 2.8 | 1.2 | 1.6 | 0.6 | 2.2 | 0.5 | 1.4 | -   | 0.5  | 0.8  | -   | 4.0 | 4.8 | -   | 1.1  | 0.3 | 2.1 | 1.7  | -   | 3.3 | 0.2 | 1.5 | 1.8 |
|  | L2      | after    | 0.3               | -    | 2.5    | 0.2  | 1.8 | 0.6 | 6.0 | 0.4 | 5.0 | 0.6 | -   | 2.2 | 5.1 | -   | 0.4  | 0.9  | -   | 1.7 | 8.0 | 0.9 | 0.7  | -   | 0.5 | 2.7  | 0.0 | 0.0 | 0.1 | 5.1 |     |
|  | L5      | before   | -                 | 1.2  | -      | 6.3  | -   | -   | 2.8 | 2.5 | -   | -   | 0.6 | 2.9 | 1.3 | 1.3 | -    | 2.7  | 2.3 | 0.6 | -   | 0.5 | -    | 0.1 | -   | -    | 2.5 | -   | -   | 0.9 |     |
|  | L5      | after    | -                 | 9.1  | -      | 1.1  | -   | -   | 1.1 | 0.6 | -   | -   | 1.5 | 1.0 | 0.4 | 1.1 | -    | 1.0  | 0.4 | 2.7 | -   | 1.6 | -    | 1.4 | -   | -    | 0.3 | -   | -   | 5.1 |     |
|  | reactor | time (d) | G5                | G7   | G12    | G13  | G16 | G17 | G18 | G19 | G20 | G22 | G24 | G26 | G27 | G32 | G41  | G51  | G64 | G79 |     |     |      |     |     |      |     |     |     |     |     |
|  |         |          | drift 2 (day 61)  | L3   | before | 0.9  | 0.5 | 0.6 | 0.4 | 1.2 | 1.5 | 0.8 | 5.2 | 1.0 | 1.2 | 2.5 | 1.2  | 0.50 | 3.3 | 1.9 | 1.3 | 2.7 | 2.0  |     |     |      |     |     |     |     |     |
|  | L3      | after    | 2.2               | 4.1  | 2.2    | 1.5  | 1.9 | 0.9 | 2.3 | 0.6 | 1.9 | 1.3 | 0.4 | 3.7 | 1.6 | 0.2 | 0.8  | 0.3  | 0.4 | 0.6 |     |     |      |     |     |      |     |     |     |     |     |
|  | L5      | before   | 0.6               | 0.5  | -      | -    | 0.8 | -   | 0.6 | 5.5 | 0.7 | -   | 3.3 | -   | 0.6 | 5.2 | 2.0  | 1.3  | 3.7 | 2.7 |     |     |      |     |     |      |     |     |     |     |     |
|  | L5      | after    | 2.4               | 2.6  | -      | -    | 1.8 | -   | 1.4 | 0.4 | 1.5 | -   | 0.3 | -   | 2.2 | 1.1 | 1.0  | 0.2  | 0.4 | 0.8 |     |     |      |     |     |      |     |     |     |     |     |
|  | reactor | time (d) | G2                | G3   | G4     | G5   | G7  | G8  | G11 | G12 | G13 | G15 | G17 | G18 | G20 | G22 | G24  | G26  | G28 | G30 | G31 | G32 | G38  | G40 | G41 | G51  | G56 | G57 | G62 | G64 | G68 |
|  |         |          | drift 3 (day 100) | L1   | before | -    | 0.0 | 0.3 | 0.6 | 0.2 | -   | 4.3 | -   | 1.0 | -   | 6.8 | -    | 7.0  | 8.4 | 0.9 | 0.6 | 1.6 | 1.6  | -   | -   | 21.0 | 9.6 | 0.0 | 1.1 | -   | -   |
|  | L1      | after    | -                 | 11.4 | 3.6    | 3.2  | 3.3 | -   | 0.5 | -   | 1.8 | -   | 1.2 | -   | 0.5 | 1.1 | 10.9 | 1.6  | 0.8 | 0.2 | -   | -   | 0.4  | 0.3 | 1.9 | 2.9  | -   | -   | 2.3 | 7.4 | 0.3 |
|  | L3      | before   | 0.6               | 0.0  | 0.3    | 1.2  | -   | 1.9 | -   | 2.2 | -   | 0.2 | 4.0 | 0.6 | 3.5 | -   | 0.7  | -    | -   | 2.6 | 0.2 | 2.1 | 17.5 | 7.3 | 0.0 | -    | 0.4 | 1.7 | -   | 0.0 | -   |
|  | L3      | after    | 2.8               | 11.2 | 2.4    | 11.5 | -   | 1.2 | -   | 0.7 | -   | 1.5 | 0.9 | 4.1 | 0.6 | -   | 5.2  | -    | -   | 0.5 | 2.2 | 0.9 | 0.8  | 0.5 | 2.1 | -    | 1.8 | 0.1 | -   | 3.3 | -   |

852

853 **Step 4: Partitioning of  $\beta$ -diversity to reveal turnover and nestedness of SCs**

854 The community composition variation was partitioned into species replacement and species loss  
 855 to determine turnover and nestedness values using a method developed for microbial community  
 856 flow cytometric data (14). The method was used to study the temporal pattern of intra- and inter-  
 857 community  $\beta$ -diversity loss when the recycling rate  $RC$  was increased. Using multiple-site  
 858 measures in the R package ‘betapart’, the turnover  $\beta_{SIM}$  and nestedness  $\beta_{NES}$  components of  
 859 Sørensen dissimilarity were calculated (15, 16) (Fig. S8.6 and Table S8.3). Multisite intra-  
 860 community  $\beta$ -diversity was calculated over all samples from the balanced period per phase per  
 861 community. Multisite inter-community  $\beta$ -diversity was calculated over five local communities (L1-  
 862 L5) per time point. The lowest intra-community  $\beta$ -diversity values for turnover  $\beta_{SIM}$  were always at  
 863  $RC_{80}$  with a mean value of  $0.34 \pm 0.02$  and the highest values for nestedness  $\beta_{NES}$  were also  
 864 always at  $RC_{80}$  with a mean value of  $0.14 \pm 0.02$ . The inter-community  $\beta$ -diversity values for  
 865 turnover  $\beta_{SIM}$  were also lowest at  $RC_{80}$  ( $0.11 \pm 0.04$ ) during the balanced periods, while the values  
 866 for nestedness  $\beta_{NES}$  remained roughly the same (Table S8.3).

867 We also investigated which SCs were nested. Nested SCs were determined if they remained  
 868 dominant at all time points over the balanced period in the respective reactor and phase (relative  
 869 cell abundance > 1.25%, Table S8.4). Generally, fewer nested SCs were observed in insular  
 870 phases than in RC phases. In insular phases, nested but different SCs were found in the various  
 871 local communities, while in RC phases, some of the SCs were nested in all reactors L1-L5 per  
 872 phase or over all phases, that is, G2 in RC<sub>10</sub>; G2, G9, G3, G4 and G11 in RC<sub>50</sub>; and G2, G9, G4,  
 873 G5, G12 and G14 in RC<sub>80</sub>.  
 874

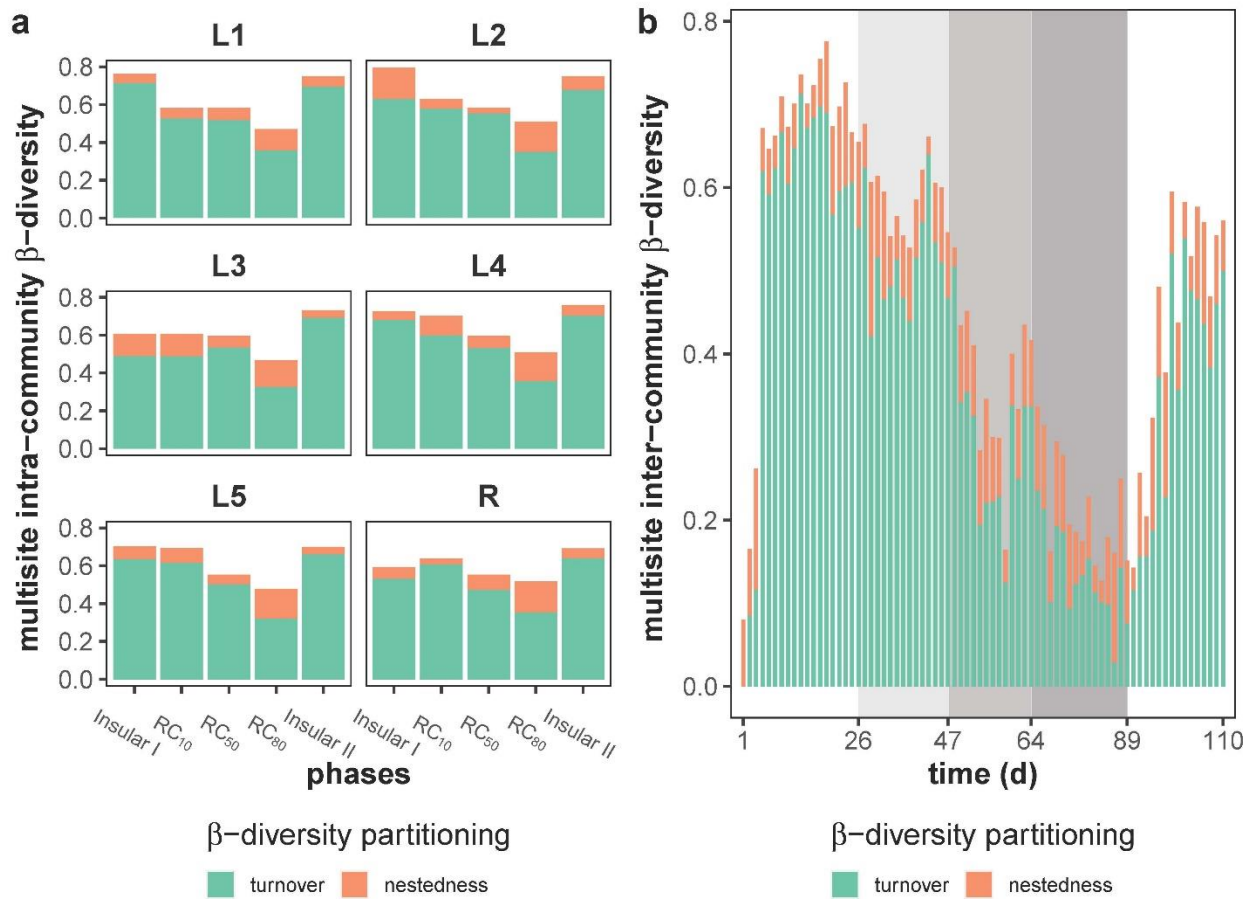

875  
 876 **Figure S8.6** Partitioning of  $\beta$ -diversity into turnover (green) and nestedness (orange) components. a)  
 877 Multisite intra-community  $\beta$ -diversity was calculated over all samples from the balanced period per phase  
 878 per community and b) multisite inter-community  $\beta$ -diversity was calculated over five local communities (L1-  
 879 L5) per time point. The shaded areas represent different phases with changed *RC*.  
 880  
 881  
 882

883 **Table S8.3** Summary of turnover and nestedness components of multisite intra- and inter-community  
 884 comparisons [Liu & Müller (14)] as mean  $\pm$  standard deviation (sd) per phase. The mean  $\pm$  sd values were  
 885 all calculated among local communities L1-L5 during balanced periods if not clarified otherwise. Asterisks  
 886 indicate that the diversity values in these phases were significantly different from those in any other phases,  
 887 at  $*p \leq 0.05$ ,  $**p \leq 0.01$  or  $***p \leq 0.001$ .

| comparison                | components | Insular I          | RC <sub>10</sub> | RC <sub>50</sub>  | RC <sub>80</sub>  | Insular II       |
|---------------------------|------------|--------------------|------------------|-------------------|-------------------|------------------|
| multisite intra-community | turnover   | 0.63 $\pm$ 0.09    | 0.56 $\pm$ 0.05  | 0.53 $\pm$ 0.02   | 0.34 $\pm$ 0.02** | 0.68 $\pm$ 0.02  |
|                           | nestedness | 0.09 $\pm$ 0.05    | 0.08 $\pm$ 0.03  | 0.05 $\pm$ 0.01   | 0.14 $\pm$ 0.02   | 0.05 $\pm$ 0.01  |
| multisite inter-community | turnover   | 0.64 $\pm$ 0.05*** | 0.52 $\pm$ 0.06* | 0.24 $\pm$ 0.07** | 0.11 $\pm$ 0.04** | 0.43 $\pm$ 0.09* |
|                           | nestedness | 0.07 $\pm$ 0.03    | 0.07 $\pm$ 0.02  | 0.08 $\pm$ 0.03   | 0.07 $\pm$ 0.04   | 0.09 $\pm$ 0.03  |

888  
 889 **Table S8.4** List of nested subcommunities (SCs) in respective reactors and phases. Nested SCs were  
 890 determined if they remained dominant (relative cell abundance > 1.25%) at all time points over the  
 891 balanced period in the respective reactor and phase. Nested SCs are marked with the number '1' and a  
 892 pink background. The SCs were ranked from left to right according to the descending order of frequencies  
 893 of being nested (numbers of pink squares).

| reactor | phase            | G2 | G9 | G3 | G4 | G11 | G8 | G18 | G22 | G5 | G12 | G14 | G24 | G1 | G33 | G64 | G15 | G32 | G13 | G17 | G19 | G20 | G26 | G38 | G43 |
|---------|------------------|----|----|----|----|-----|----|-----|-----|----|-----|-----|-----|----|-----|-----|-----|-----|-----|-----|-----|-----|-----|-----|-----|
| L1      | Insular I        | 0  | 0  | 0  | 0  | 0   | 0  | 0   | 0   | 0  | 0   | 0   | 0   | 0  | 0   | 0   | 0   | 0   | 0   | 0   | 0   | 0   | 0   | 0   | 0   |
| L2      | Insular I        | 0  | 0  | 1  | 0  | 0   | 0  | 0   | 0   | 0  | 0   | 0   | 0   | 0  | 0   | 0   | 0   | 1   | 0   | 0   | 0   | 0   | 0   | 0   | 0   |
| L3      | Insular I        | 1  | 1  | 0  | 1  | 1   | 0  | 1   | 0   | 0  | 0   | 0   | 0   | 0  | 0   | 0   | 1   | 0   | 0   | 0   | 0   | 0   | 0   | 0   | 0   |
| L4      | Insular I        | 0  | 0  | 0  | 0  | 0   | 0  | 1   | 0   | 0  | 0   | 0   | 0   | 0  | 0   | 0   | 0   | 0   | 0   | 0   | 0   | 0   | 0   | 0   | 0   |
| L5      | Insular I        | 0  | 0  | 0  | 0  | 0   | 0  | 1   | 0   | 0  | 0   | 0   | 0   | 0  | 0   | 0   | 0   | 0   | 1   | 0   | 0   | 0   | 1   | 0   | 0   |
| R       | Insular I        | 1  | 1  | 0  | 0  | 1   | 0  | 1   | 1   | 0  | 0   | 0   | 1   | 0  | 0   | 0   | 1   | 0   | 0   | 0   | 0   | 0   | 0   | 0   | 0   |
| L1      | RC <sub>10</sub> | 1  | 0  | 1  | 1  | 0   | 1  | 0   | 0   | 0  | 0   | 0   | 1   | 0  | 0   | 0   | 0   | 0   | 0   | 0   | 0   | 0   | 0   | 0   | 0   |
| L2      | RC <sub>10</sub> | 1  | 0  | 1  | 0  | 0   | 0  | 0   | 0   | 0  | 0   | 0   | 1   | 0  | 0   | 1   | 0   | 0   | 0   | 0   | 0   | 0   | 0   | 0   | 1   |
| L3      | RC <sub>10</sub> | 1  | 1  | 1  | 0  | 0   | 0  | 1   | 0   | 0  | 0   | 0   | 1   | 0  | 0   | 1   | 0   | 0   | 0   | 0   | 0   | 0   | 0   | 0   | 0   |
| L4      | RC <sub>10</sub> | 1  | 0  | 0  | 0  | 1   | 0  | 0   | 0   | 0  | 0   | 0   | 0   | 0  | 0   | 0   | 0   | 0   | 0   | 0   | 0   | 0   | 0   | 0   | 0   |
| L5      | RC <sub>10</sub> | 1  | 0  | 0  | 0  | 0   | 0  | 0   | 0   | 0  | 0   | 0   | 0   | 0  | 0   | 0   | 0   | 0   | 0   | 0   | 0   | 1   | 0   | 0   | 0   |
| R       | RC <sub>10</sub> | 1  | 0  | 1  | 0  | 0   | 0  | 0   | 0   | 0  | 0   | 0   | 1   | 0  | 0   | 1   | 0   | 0   | 0   | 0   | 0   | 0   | 0   | 0   | 0   |
| L1      | RC <sub>50</sub> | 1  | 1  | 1  | 1  | 1   | 1  | 0   | 0   | 0  | 0   | 0   | 0   | 0  | 0   | 0   | 0   | 0   | 0   | 0   | 0   | 0   | 0   | 0   | 0   |
| L2      | RC <sub>50</sub> | 1  | 1  | 1  | 1  | 1   | 0  | 0   | 0   | 0  | 0   | 0   | 0   | 0  | 0   | 0   | 0   | 0   | 0   | 0   | 0   | 0   | 0   | 0   | 0   |
| L3      | RC <sub>50</sub> | 1  | 1  | 1  | 1  | 1   | 1  | 0   | 0   | 0  | 0   | 0   | 0   | 0  | 0   | 0   | 0   | 0   | 0   | 0   | 0   | 0   | 0   | 0   | 0   |
| L4      | RC <sub>50</sub> | 1  | 1  | 1  | 1  | 1   | 1  | 0   | 0   | 0  | 0   | 0   | 0   | 0  | 0   | 0   | 0   | 0   | 0   | 0   | 0   | 0   | 0   | 0   | 0   |
| L5      | RC <sub>50</sub> | 1  | 1  | 1  | 1  | 1   | 1  | 0   | 0   | 0  | 0   | 0   | 0   | 0  | 0   | 0   | 0   | 0   | 0   | 0   | 0   | 0   | 1   | 0   | 0   |
| R       | RC <sub>50</sub> | 1  | 1  | 1  | 1  | 1   | 1  | 0   | 0   | 0  | 0   | 0   | 0   | 0  | 0   | 0   | 1   | 0   | 0   | 1   | 0   | 0   | 0   | 0   | 0   |
| L1      | RC <sub>80</sub> | 1  | 1  | 1  | 1  | 0   | 0  | 1   | 0   | 1  | 1   | 1   | 0   | 0  | 0   | 0   | 0   | 0   | 0   | 0   | 0   | 0   | 0   | 0   | 0   |
| L2      | RC <sub>80</sub> | 1  | 1  | 0  | 1  | 0   | 0  | 0   | 0   | 1  | 1   | 1   | 0   | 0  | 0   | 0   | 0   | 0   | 0   | 0   | 0   | 0   | 0   | 0   | 0   |
| L3      | RC <sub>80</sub> | 1  | 1  | 1  | 1  | 0   | 0  | 1   | 0   | 1  | 1   | 1   | 0   | 0  | 1   | 0   | 0   | 0   | 0   | 0   | 0   | 0   | 0   | 0   | 0   |
| L4      | RC <sub>80</sub> | 1  | 1  | 0  | 1  | 0   | 0  | 0   | 0   | 1  | 1   | 1   | 0   | 0  | 1   | 0   | 0   | 0   | 0   | 0   | 0   | 0   | 0   | 0   | 0   |
| L5      | RC <sub>80</sub> | 1  | 1  | 1  | 1  | 0   | 0  | 1   | 0   | 1  | 1   | 1   | 0   | 0  | 1   | 0   | 0   | 0   | 0   | 0   | 0   | 0   | 0   | 0   | 0   |
| R       | RC <sub>80</sub> | 1  | 1  | 1  | 1  | 0   | 0  | 1   | 0   | 1  | 1   | 1   | 0   | 0  | 1   | 0   | 0   | 0   | 0   | 0   | 0   | 0   | 0   | 0   | 0   |
| L1      | Insular II       | 0  | 0  | 0  | 0  | 0   | 0  | 0   | 0   | 0  | 0   | 0   | 0   | 1  | 0   | 0   | 0   | 0   | 0   | 0   | 0   | 0   | 0   | 0   | 0   |
| L2      | Insular II       | 0  | 1  | 0  | 0  | 0   | 0  | 0   | 0   | 0  | 0   | 0   | 0   | 1  | 0   | 0   | 0   | 0   | 1   | 0   | 0   | 0   | 0   | 0   | 0   |
| L3      | Insular II       | 0  | 1  | 0  | 0  | 0   | 0  | 1   | 0   | 0  | 0   | 0   | 0   | 0  | 0   | 0   | 0   | 0   | 0   | 0   | 0   | 0   | 0   | 0   | 0   |
| L4      | Insular II       | 0  | 1  | 0  | 0  | 0   | 0  | 1   | 0   | 0  | 0   | 0   | 0   | 0  | 0   | 0   | 0   | 0   | 0   | 0   | 0   | 0   | 0   | 0   | 0   |
| L5      | Insular II       | 0  | 1  | 0  | 0  | 0   | 1  | 0   | 1   | 0  | 0   | 0   | 0   | 1  | 0   | 0   | 0   | 0   | 0   | 0   | 0   | 0   | 0   | 0   | 0   |
| R       | Insular II       | 0  | 1  | 0  | 0  | 0   | 1  | 0   | 1   | 0  | 0   | 0   | 0   | 1  | 0   | 0   | 0   | 0   | 0   | 0   | 0   | 0   | 0   | 0   | 0   |

## 894 S9: Taxonomic composition of whole communities and sorted SCs

### 895 Step 1: Taxonomic composition of communities

896 A total of 96 whole-community samples were chosen for taxonomic analysis with two aims: 1) to  
 897 confirm the variation in flow-cytometric-analysis-based community composition caused by mass  
 898 transfer, for which samples of inoculum (day 0), for the 2<sup>nd</sup> and the 8<sup>th</sup> days as well as the final  
 899 day for each phase were chosen for all local communities L1-L5 and the regional pool R (starting  
 900 at day 9); and 2) to confirm the drifts identified by flow-cytometric-analysis-based intra-community  
 901 variation, for which samples of three time points at which drifts occurred in at least two local  
 902 communities were chosen (Tables S8.1, S8.2), namely, RC<sub>10</sub>: drift at day 47 in L2 and L5, RC<sub>50</sub>:  
 903 drift at day 61 in L3 and L5, and Insular II: drift at day 100 in L1 and L3. The samples of day 44 in  
 904 L2 and L5, day 55 in L3 and L5, and day 97 in L1 and L3 were taken for comparison of community  
 905 states. The sampling time points for each reactor are listed in Table S9.1.

906  
 907 **Table S9.1** The time points (day) of samples for whole-community taxonomic analysis are listed per reactor  
 908 and phase. The time points in bold are those used to study the impact of drifts on community variation. The  
 909 shaded areas represent different phases with changed RC. The time points of days 26, 47, 64 and 89 were  
 910 the days on which the phases ended as well as those on which the next phases started; therefore, drifts at  
 911 day 47 happened at phase RC<sub>10</sub>, while drifts at day 61 and day 100 happened at RC<sub>50</sub> and Insular II.

| reactor/<br>phase | inoculum | Insular I | RC <sub>10</sub>      | RC <sub>50</sub>       | RC <sub>80</sub> | Insular II               |
|-------------------|----------|-----------|-----------------------|------------------------|------------------|--------------------------|
| L1                | 0        | 1, 8, 26  | 27, 34, 47            | 48, 55, 64             | 65, 72, 89       | 90, 97, <b>100</b> , 107 |
| L2                |          | 1, 8, 26  | 27, 34, 44, <b>47</b> | 48, 55, 64             | 65, 72, 89       | 90, 97, 107              |
| L3                |          | 1, 8, 26  | 27, 34, 47            | 48, 55, <b>61</b> , 64 | 65, 72, 89       | 90, 97, <b>100</b> , 107 |
| L4                |          | 1, 8, 26  | 27, 34, 47            | 48, 55, 64             | 65, 72, 89       | 90, 97, 107              |
| L5                |          | 1, 8, 26  | 27, 34, 44, <b>47</b> | 48, 55, <b>61</b> , 64 | 65, 72, 89       | 90, 97, 107              |
| R                 | -        | 9, 26     | 27, 34, 47            | 48, 55, 64             | 65, 72, 89       | 90, 97, 107              |

912  
 913 The taxonomic composition of communities at genus level is shown in Fig. S9.1 (the relative  
 914 abundance table of communities at species level is shown in Dataset S4). A total of 18 classes  
 915 and 159 genera were identified over all whole-community samples. Generally, the communities  
 916 were dominated by the classes Bacteroidia, Gammaproteobacteria and Alphaproteobacteria,  
 917 which are typical members of activated sludge (17, 18). At phases Insular I, RC<sub>10</sub> and Insular II,  
 918 communities harboured more diverse genera, namely, *Leadbetterella*, *Azospirillum*,  
 919 *Pseudacidovorax*, *Brevundimonas* and *Pedobacter*. Although the taxonomic compositions of the  
 920 local communities L1-L5 and the regional pool R were fairly comparable within each of the five  
 921 phases, the compositions clearly differed between the phases. Therefore, the 16S rRNA gene

922 sequencing data supported the findings obtained by flow cytometry. The 16S rRNA gene  
923 sequencing data showed for the RC<sub>50</sub> and RC<sub>80</sub> high-rate recycling phases high synchrony in  
924 community compositions (Fig. S9.1). An unassigned genus from *Sphingobacteriaceae* (family)  
925 accounted for about half of the genera in RC<sub>50</sub> and RC<sub>80</sub>, and *Leadbetterella* and *Azospirillum*  
926 persisted but at lower relative abundances (Fig. S9.1). Members of the *Sphingobacteriaceae* have  
927 been reported to degrade a variety of organic chemicals (19-21), indicating their ability to use  
928 complex 'leftover' substrates. Members of *Azospirillum* are known for the ability to fix nitrogen  
929 (22) and thus could help overcome nitrogen deficiency specifically in RC<sub>80</sub>. These major genera  
930 indicated the key role of nutrient availability in community building and it appears that mass  
931 transfer supported this dominance.

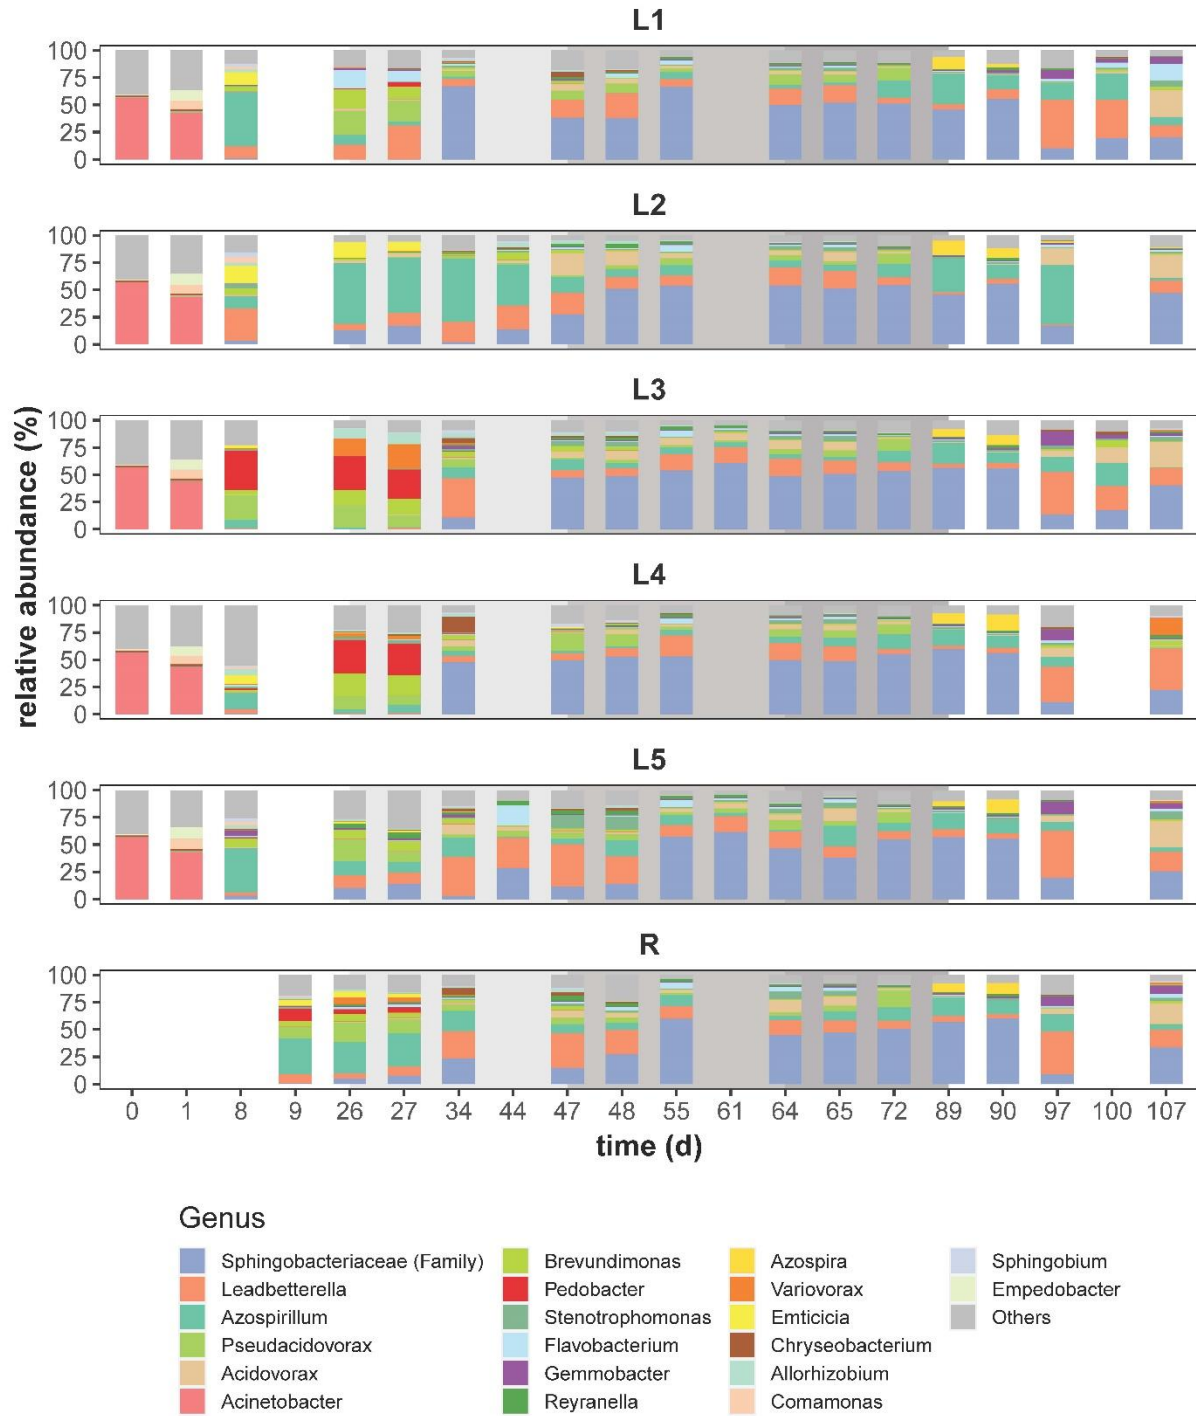

932

933 **Figure S9.1** The taxonomic composition in relative abundance (%) of communities over time at the genus  
 934 level. A total of 159 genera were identified. The top 20 most abundant genera are colour-coded and stacked  
 935 from bottom to top per column in decreasing order of mean relative abundance over all samples. An  
 936 unassigned genus from the family *Sphingobacteriaceae* is labelled by this family. The relative abundances



937 of genera other than the top 20 are summed up and represented as 'Others'. The shaded areas represent  
938 different phases with changed *RC*.

939  
940 The NMDS analysis based on relative abundances of all 159 genera (Fig. S9.2) was supported  
941 by the R package 'vegan' (13) and visualized identically to the procedure used for the flow  
942 cytometric single-cell data shown in Fig. 2a. The trend of taxonomic composition of communities  
943 confirmed the trend revealed by flow cytometric fingerprints. The most extreme change was  
944 observed during the adaptation period of Insular I phase from day 1 to day 8, and all local  
945 communities L1-L5 evolved in similar directions at the end of Insular I phase. As *RC* increased  
946 from 10% to 80%, the communities became increasingly convergent on both regional and  
947 temporal scales. When recycling ended, community divergence increased slightly again  
948 compared with the levels at  $RC_{50}$  and  $RC_{80}$ . Thus, the data obtained by 16S gene sequencing  
949 clearly evidenced the influence of mass transfer on community composition demonstrated by the  
950 flow cytometric data.

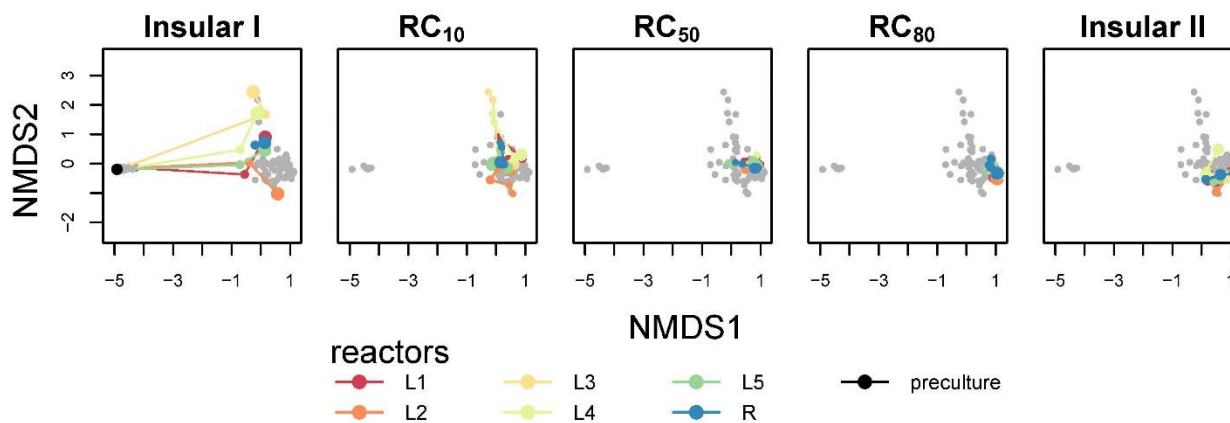

951  
952 **Figure S9.2** NMDS analysis using relative abundance of all genera (total of 159) based on Bray-Curtis  
953 dissimilarities (try = 100, trymax = 200). Successive and connected time points indicate the assembly  
954 trajectory of communities. Points in grey represent samples from the other phases.

955  
956 Additional whole-community samples were analyzed at days 47, 61 and 100 to clarify changes in  
957 community composition occurring due to drift events previously determined by intra-community  
958  $\beta$ -diversity based on flow cytometric data (Table S9.1). For comparison, the intra-community  $\beta$ -  
959 diversity based on the taxonomic composition of communities at the genus level was calculated  
960 following the workflow used for flow cytometric data (Supplementary Information S8, step 3). First,  
961 all genera with relative abundance > 0.63% (1/159, 1/total number of genera) were determined

962 as 'dominant genera'. Second, the intra-community  $\beta$ -diversity was computed as the number of  
 963 unique dominant genera, which were not shared by pairwise samples from successive time points  
 964 per community. Third, owing to limited time points sampled for taxonomic analysis, the  
 965 comparison could not be performed for short time intervals as was done for the much higher  
 966 available sample numbers of flow cytometric data. Instead, the pairwise comparison could only  
 967 be undertaken across long time intervals (varying from 1 to 18 days). To create a comparison with  
 968 these data, the intra-community  $\beta$ -diversity based on SCs was therefore recomputed using the  
 969 same pairwise samples at chosen time points (Table S9.1, unfilled circles in Fig. S9.3). We found  
 970 that the variations of intra-community  $\beta$ -diversity based on the two analyses were similar and that  
 971 the intra-community  $\beta$ -diversity values for both analyses decreased as *RC* increased, pointing to  
 972 the fact that increasing *RC* is a means of preventing stochastic events.  
 973 The drifts events were calculated in the balanced periods of all phases. The values based on SCs  
 974 were often higher than the corresponding values based on genus level, and the latter were so low  
 975 at some time points that no drift could be detected. These findings showed that some drifts in SCs  
 976 clearly detected by flow cytometric analysis were not revealed at the genus level. Thus, the  $\beta$ -  
 977 diversity of SCs was more sensitive as indicator of community variation than the genus level. The  
 978 background for these findings is that cells of the same genus may occupy different gates (SCs)  
 979 in the gate template, whereas sequencing does not take into account physiological cell properties.

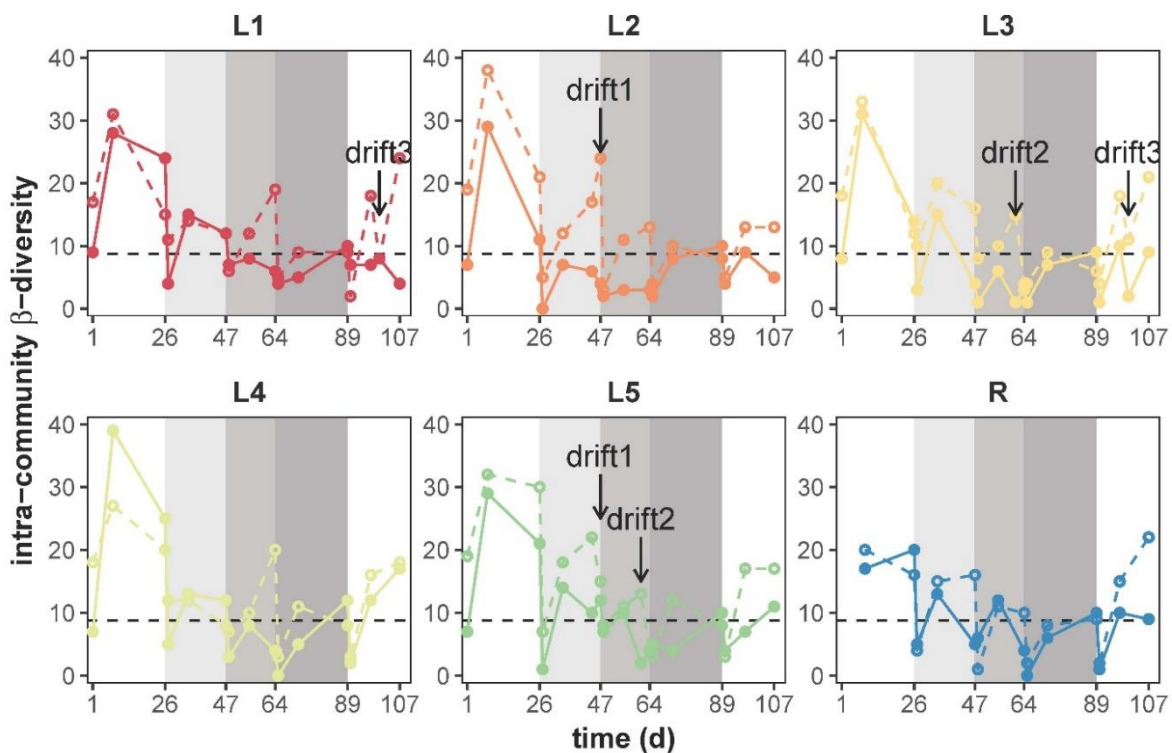

980 **Figure S9.3** Drift events, detected by intra-community  $\beta$ -diversity variations based on flow cytometric data  
981 (SCs, open circles and dashed lines) and based on 16S rRNA amplicon sequencing data (genus, closed  
982 circles and closed line). The intra-community  $\beta$ -diversity was calculated as the number of unshared  
983 dominant genera (relative abundance > 0.63%) or dominant SCs (relative cell abundance > 1.25%) by  
984 pairwise samples from successive time points per community. The dashed black line marks the threshold  
985 determining drift (8.76), and the labels and arrows indicate three drifts from which cells were chosen for  
986 16S rRNA gene analyses. The following drifts were chosen: drift1: day 47 in L2 and L5, drift2 day 61 in L3  
987 and L5, and drift 3: day 100 in L1 and L3. The shaded areas represent different phases with changed *RC*.  
988

### 989 Step 2: Taxonomic assignment of sorted SCs

990 Cells of gates were cytometrically sorted only when their abundance was above 2%. Out of 35,840  
991 SCs a total of 51 SCs were selected for cell sorting and taxonomic analysis based on four specific  
992 features: 1) *mass transfer*, to confirm the redistribution of SCs from R to L1-L5 (e.g. G5, G12, G14  
993 and G33) during  $RC_{80}$ , which were also correlated with *RC* (Fig. S12.1 and Fig. S8.3); 2) *net*  
994 *growth rate*, to investigate the taxonomy of cells in SCs, which grew (i.e.  $\mu'_{SC_x} > 0$  in  $\geq 4$   
995 reactors) at  $RC_{80}$  in L1-L5 (Fig. 4): G1, G5, G9, G13, G18, G25, G33. In addition, we were  
996 interested in cells that did not grow but were rescued from R at  $RC_{80}$  in L1-L5 (i.e.  $\mu'_{SC_x} = 0$  in  $\geq$   
997 2 reactors, Fig. 4): G2, G4, G11, G12, G14; 3) *nestedness*, to investigate the taxonomy of cells  
998 in the most nested SCs, that is, at  $RC_{50}$ : G2, G3, G4, G8, G9, G11 and at  $RC_{80}$ : G5, G12, G14  
999 (Table S8.4); and 4) *drifts*, to investigate the taxonomy of cells benefitting from drifts (drift1: G3,  
1000 G16, G22, G33, G79; drift2: G5, G7, G12, G18; drift3: G3, G4, G5, G7, G18, G24) or being  
1001 disadvantaged by drifts (drift1: G1, G7, G24, G26; drift2: G19, G24; drift3: G12, G20, G38; Table  
1002 S8.2). The sorted SCs are listed according to sample time and reactors in Table S9.2. The  
1003 position of the sorted SCs in the gate template is shown in Fig. S9.4. The taxonomic composition  
1004 of sorted SCs is shown at the genus level in Fig. S9.5 (Dataset S5). A total of 26 classes and 186  
1005 genera were identified over all sorted SC samples. Generally, most sorted SCs were dominated  
1006 by only one or two classes, namely, Alphaproteobacteria, Gammaproteobacteria, Bacteroidia or  
1007 Actinobacteria. At the genus level, most SCs were mono-dominant (marked in colour, Table S9.2).  
1008 Only a few SCs comprised different genera (i.e., 047\_G79\_L2<sup>4</sup>, 061\_G5/G12\_L3<sup>4</sup>,  
1009 085\_G5\_L1/L3/R<sup>1,2,3</sup>, 085\_G14\_L1<sup>1,2,3</sup>, 086\_G9/G25\_L2<sup>2</sup>).

1010

1011 **Table S9.2** Fifty-one cytometrically sorted SCs from respective time points (day) and reactors for taxonomic  
1012 analysis. Each sample is named as 'time\_gate\_reactor'. The number labelled as superscript beside the  
1013 sample name indicates the subjects it involved: 1, mass transfer; 2, net growth rate; 3, nestedness; 4, drifts.

1014 Colour shades mark SCs dominated by *Azospirillum* [green], *Leadbetterella* [orange], an unassigned genus from  
 1015 *Sphingobacteriaceae* (family) [blue], an unassigned genus from PeM15 (order) [pink], *Pseudacidovorax* [light green],  
 1016 *Azospira* [yellow], *Acidovorax* [tan], *Reyranella* [dark green], *Stenotrophomonas* [grey-green], *Brevundimonas* [lime green], *Ochrobactrum*  
 1017 [dark green], *Sphingopyxis* [cyan] and *Microbacterium* [blue].

| time (d) | gate | reactor                     |                         |                             |                         |                         |                            |
|----------|------|-----------------------------|-------------------------|-----------------------------|-------------------------|-------------------------|----------------------------|
|          |      | L1                          | L2                      | L3                          | L4                      | L5                      | R                          |
| 26       | G33  |                             | 026_G33_L2 <sup>1</sup> |                             |                         |                         |                            |
| 44       | G1   |                             | 044_G1_L2 <sup>4</sup>  |                             |                         |                         |                            |
| 44       | G7   |                             |                         |                             |                         | 044_G7_L5 <sup>4</sup>  |                            |
| 44       | G24  |                             | 044_G24_L2 <sup>4</sup> |                             |                         |                         |                            |
| 44       | G26  |                             | 044_G26_L2 <sup>4</sup> |                             |                         |                         |                            |
| 47       | G3   |                             |                         |                             |                         | 047_G3_L5 <sup>4</sup>  |                            |
| 47       | G16  |                             | 047_G16_L2 <sup>4</sup> |                             |                         |                         |                            |
| 47       | G22  |                             | 047_G22_L2 <sup>4</sup> |                             |                         |                         |                            |
| 47       | G33  |                             | 047_G33_L2 <sup>4</sup> |                             |                         |                         |                            |
| 47       | G79  |                             | 047_G79_L2 <sup>4</sup> |                             |                         |                         |                            |
| 58       | G19  |                             |                         | 058_G19_L3 <sup>4</sup>     |                         |                         |                            |
| 58       | G24  |                             |                         | 058_G24_L3 <sup>4</sup>     |                         |                         |                            |
| 61       | G5   |                             |                         | 061_G5_L3 <sup>4</sup>      |                         |                         |                            |
| 61       | G7   |                             |                         | 061_G7_L3 <sup>4</sup>      |                         |                         |                            |
| 61       | G12  |                             |                         | 061_G12_L3 <sup>4</sup>     |                         |                         |                            |
| 61       | G18  |                             |                         | 061_G18_L3 <sup>4</sup>     |                         |                         |                            |
| 63       | G2   | 063_G2_L1 <sup>3</sup>      |                         |                             |                         |                         |                            |
| 63       | G3   | 063_G3_L1 <sup>3</sup>      |                         |                             |                         |                         |                            |
| 63       | G4   |                             |                         | 063_G4_L3 <sup>3</sup>      |                         |                         |                            |
| 63       | G8   |                             |                         | 063_G8_L3 <sup>3</sup>      |                         |                         |                            |
| 63       | G9   |                             |                         | 063_G9_L3 <sup>3</sup>      |                         |                         |                            |
| 63       | G11  | 063_G11_L1 <sup>3</sup>     |                         |                             |                         |                         |                            |
| 71       | G2   |                             |                         |                             |                         | 071_G2_L5 <sup>2</sup>  |                            |
| 71       | G4   | 071_G4_L1 <sup>2</sup>      |                         |                             |                         |                         |                            |
| 71       | G11  |                             |                         |                             |                         | 071_G11_L5 <sup>2</sup> |                            |
| 85       | G5   | 085_G5_L1 <sup>1,2,3</sup>  |                         | 085_G5_L3 <sup>1,2,3</sup>  |                         |                         | 085_G5_R <sup>1,2,3</sup>  |
| 85       | G12  | 085_G12_L1 <sup>1,2,3</sup> |                         | 085_G12_L3 <sup>1,2,3</sup> |                         |                         | 085_G12_R <sup>1,2,3</sup> |
| 85       | G14  | 085_G14_L1 <sup>1,2,3</sup> |                         | 085_G14_L3 <sup>1,2,3</sup> |                         |                         | 085_G14_R <sup>1,2,3</sup> |
| 85       | G33  | 085_G33_L1 <sup>1,2</sup>   |                         | 085_G33_L3 <sup>1,2</sup>   |                         |                         | 085_G33_R <sup>1,2</sup>   |
| 86       | G1   |                             | 086_G1_L2 <sup>2</sup>  |                             |                         |                         |                            |
| 86       | G9   |                             | 086_G9_L2 <sup>2</sup>  |                             |                         |                         |                            |
| 86       | G13  |                             |                         |                             | 086_G13_L4 <sup>2</sup> |                         |                            |
| 86       | G18  |                             | 086_G18_L2 <sup>2</sup> |                             |                         |                         |                            |
| 86       | G25  |                             | 086_G25_L2 <sup>2</sup> |                             |                         |                         |                            |
| 99       | G12  |                             |                         | 099_G12_L3 <sup>4</sup>     |                         |                         |                            |
| 99       | G20  | 099_G20_L1 <sup>4</sup>     |                         |                             |                         |                         |                            |
| 99       | G38  | 099_G38_L1 <sup>4</sup>     |                         |                             |                         |                         |                            |
| 100      | G3   | 100_G3_L1 <sup>4</sup>      |                         |                             |                         |                         |                            |
| 100      | G4   | 100_G4_L1 <sup>4</sup>      |                         |                             |                         |                         |                            |
| 100      | G5   |                             |                         | 100_G5_L3 <sup>4</sup>      |                         |                         |                            |
| 100      | G7   | 100_G7_L1 <sup>4</sup>      |                         |                             |                         |                         |                            |
| 100      | G18  |                             |                         | 100_G18_L3 <sup>4</sup>     |                         |                         |                            |
| 100      | G24  | 100_G24_L1 <sup>4</sup>     |                         |                             |                         |                         |                            |

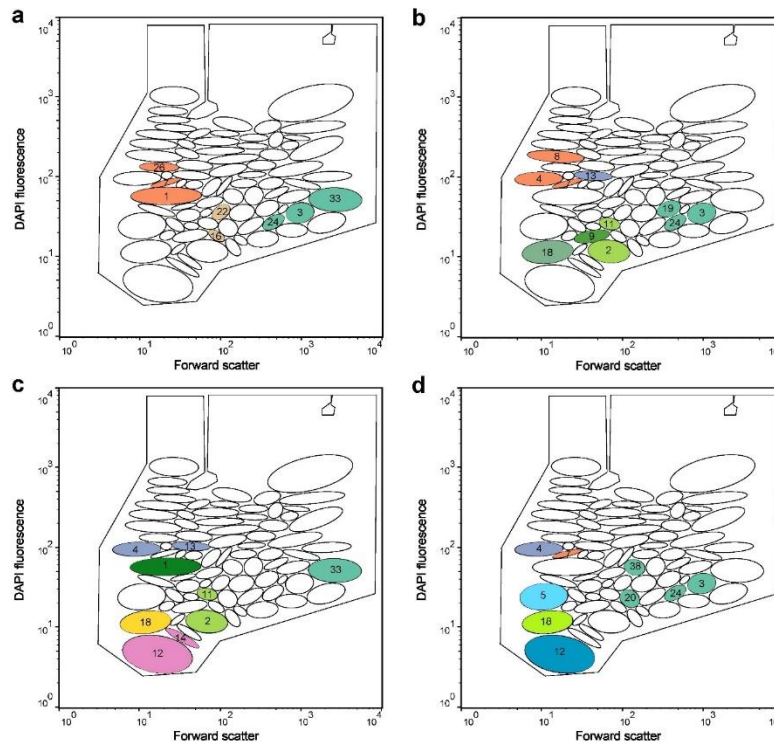

1019 **Figure S9.4** The sorted SCs from a: phase RC<sub>10</sub> (days 26, 44, and 47), b: RC<sub>50</sub> (days 58, 61 and 63), c:  
 1020 RC<sub>80</sub> (days 71, 85 and 86) and d: Insular II (days 99 and 100) are coloured according to their mono-  
 1021 dominance of *Azospirillum* [green], *Leadbetterella* [orange], an unassigned genus from *Spingobacteriaceae* (family)  
 1022 [blue], an unassigned genus from PeM15 (order) [pink], *Pseudacidovorax* [light green], *Azospira* [yellow], *Acidovorax* [brown],  
 1023 *Reyranela* [dark green], *Stenotrophomonas* [medium green], *Brevundimonas* [light yellow-green], *Ochrobactrum* [dark green], *Sphingopyxis* [cyan] and  
 1024 *Microbacterium* [dark blue]. The numbers (x) inside gates label the corresponding gate name: 'Gx'.

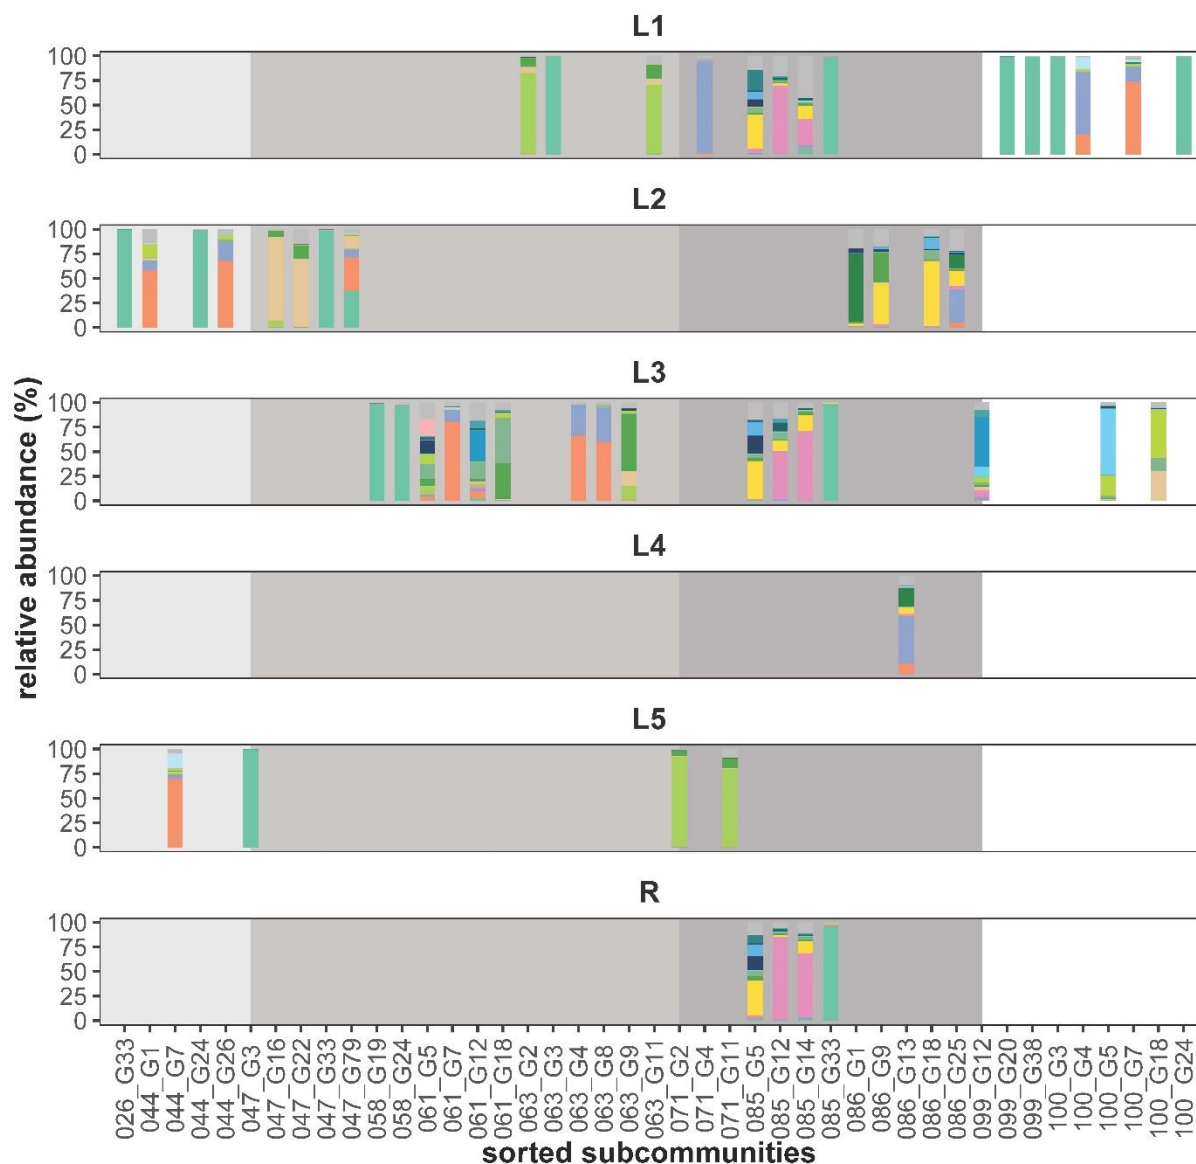

1025  
 1026 **Figure S9.5** The taxonomic composition in relative abundance (%) of sorted SCs at the genus level. In  
 1027 total, 186 genera were identified. The top 20 most abundant genera are color-coded and stacked from  
 1028 bottom to top per column in decreasing order of mean relative abundance over all SCs samples. The  
 1029 unassigned genera are labelled with the respective family or order. The relative abundances of genera

1030 other than the top 20 are summed up and represented as 'Others'. The shaded areas represent different  
1031 phases with changed *RC*.

1032

1033 The genus assignments of cells in these SCs are discussed under the four specific features  
1034 mentioned above:

1035 Mass transfer & net growth rate: Mass transfer supported the persistence of SCs in local  
1036 communities, either by enabling their local growth or by rescuing nongrowing SCs by their growth  
1037 in the regional pool R. For example, at  $RC_{80}$ , *Azospirillum* (G33), *Azospira* (G9, G18), and  
1038 *Ochrobactrum* (G1, Fig. S9.5, presenting only SCs > 2% cell abundance) followed the former  
1039 mechanism ('growth'), and grew also at lower abundance in a set of local communities (Fig. 4),  
1040 while an unassigned genus from PeM15 (order, G12 and G14), *Sphingobacteriaceae* (family, G4)  
1041 and *Pseudacidovorax* (G2, G11, Fig. S9.5) followed the latter mechanism ('rescue') and did not  
1042 grow in local communities in  $RC_{80}$ , but were rescued by growth in the regional pool R (Fig. 4). The  
1043 mono-dominant SCs that showed net growth and that were rescued can be assumed to be  
1044 superior local competitors. Some SCs that are also among the growing SCs (G5, G9, G25, Table  
1045 S9.2) were multi-dominant and it can be assumed that the genera in each of the SCs can  
1046 cooperate under  $RC_{80}$  conditions.

1047 Nestedness: Generally, nested SCs were those that persisted in the different phases of the 114-  
1048 generation experiment. For phase  $RC_{50}$ , we found for the flow cytometrically determined  
1049 nestedness the SCs G2, G3, G4, G8, G9, and G11 (Table S8.4). Nearly the same gates were  
1050 calculated as nested ones from the 16S rRNA gene sequencing data: genera *Azospirillum* (G3),  
1051 *Leadbetterella* (G4, G8), *Pseudacidovorax* (G2, G11) and *Reyranelia* (G9).

1052 In  $RC_{80}$ , flow cytometrically determined nested SCs were G2, G4, G5, G9, G12, and G14 (Table  
1053 S8.4). Sequencing data found PeM15 (order, G12, G14) and *Pseudacidovorax* (G2) nested, while  
1054 G5 and G9 were mostly multi-dominant and changed their proportions of contained genera from  
1055  $RC_{50}$  to  $RC_{80}$ .

1056 In general, mass transfer supported genera such as G2, G12 and G14, which were nested and  
1057 rescued by their ability to accumulate in the regional pool R (e.g., the unassigned genus from  
1058 PeM15).

1059 Drifts: Drifts are of stochastic nature when growth conditions are balanced. Three drift events  
1060 occurring during 114 generations of cultivation were taxonomically investigated (Table S9.1). We  
1061 found a flow cytometrically determined drift1 in  $RC_{10}$  where G1, G7, G24 and G26 decreased and  
1062 G3, G16, G22, G33 and G79 increased in cell abundance (Table S8.2). 16S rRNA gene  
1063 sequencing revealed the loss of *Leadbetterella* (G1, G7, G26) and the gain of *Acidovorax* (G16,



1064 G22). Meanwhile, *Azospirillum* was lost from G24 and reappeared in G3 and G33. Drift2 (RC<sub>50</sub>,  
1065 day 61) showed cytometrically determined gates with decreased (G19, G24) and increased cell  
1066 abundance (G5, G7, G12, G18). 16S rRNA gene sequencing revealed the loss of *Azospirillum*  
1067 (G19, G24) and the gain of *Leadbetterella* (G7) and *Stenotrophomonas* (G18). Drift3 (Insular II,  
1068 day 100) showed cytometrically determined gates with decreased (G12, G20, G38) and increased  
1069 cell abundance (G3, G4, G5, G7, G18, G24). 16S rRNA gene sequencing revealed the loss of  
1070 *Microbacterium* (G12) and the gain of an unassigned genus from *Sphingobacteriaceae* (G4),  
1071 *Sphingopyxis* (G5), *Leadbetterella* (G7) and *Brevundimonas* (G18). *Azospirillum* was lost from  
1072 G20 and G38 and was gained in G3 and G24.  
1073 *Azospirillum* showed its physiological flexibility by switching between different SCs, probably due  
1074 to cell cycling states (23), rather than going extinct. Other genera also showed that flexibility,  
1075 although the different SCs can also comprise different species or ecotypes. These findings  
1076 support the lower intra-community  $\beta$ -diversity, calculated at the genus level, in comparison to the  
1077 SCs calculated based on flow cytometric data (Fig. S9.3). This flexibility of some of the dominant  
1078 genera that were also nested and that showed net growth or were rescued by mass transfer  
1079 appears to have abolished the stochastic events occurring in the balanced periods under RC.

1080  
1081

## 1082 S10: Calculation of the net growth rate $\mu'$

1083 In this study, the biomass was quantified by counting cell numbers in local communities L1-L5  
1084 and the regional pool R (Fig. S5.2). The change of the total cell number during an interval  $\Delta t$  (d)  
1085 was determined by cell numbers coming from the influent, cell numbers lost by the effluent and  
1086 the net growth rate  $\mu'$  of cells within  $\Delta t$  (d).

1087

$$1088 \quad \text{Change} = \text{Net growth} + \text{Influent} - \text{Effluent} \quad \text{Eq. S10.1}$$

1089

1090 The reactors of the five local communities L1-L5 and the regional pool R were fully mixed.  
1091 Therefore, the cell numbers of the influent into local communities L1-L5 and into the regional pool  
1092 R (influent<sub>L<sub>in</sub></sub> or influent<sub>R<sub>in</sub></sub>) were equal to the cell numbers of the reactors from which the influent  
1093 was pumped. In addition, the cell numbers in the effluent (effluent<sub>L<sub>out</sub></sub> or effluent<sub>R<sub>out</sub></sub>) were equal to  
1094 the cell numbers in that same reactor (L1-L5 or R). The net growth rate  $\mu'$  of cells was calculated  
1095 by the following equations:

1096

1097 
$$\Delta n_{L,R} \cdot V_{L,R} = \mu' \cdot V_{L,R} \cdot n_{L,R} \cdot \Delta t + Q_{in} \cdot n_{in} \cdot \Delta t - Q_{eff} \cdot n_{eff} \cdot \Delta t$$
 Eq. S10.2

1098

1099 
$$\mu' = \frac{\Delta n_{L,R}}{\Delta t \cdot n_{L,R}} - \frac{Q_{in} \cdot n_{in}}{V_{L,R} \cdot n_{L,R}} + \frac{Q_{eff} \cdot n_{eff}}{V_{L,R} \cdot n_{L,R}}$$
 Eq. S10.3

1100 with:

| symbol                        | description                                                                                                                                                           |
|-------------------------------|-----------------------------------------------------------------------------------------------------------------------------------------------------------------------|
| $n_{L,R}, n_{in}$ & $n_{eff}$ | cell numbers (cells mL <sup>-1</sup> ) per reactor [local communities ( $n_L$ ) and regional pool ( $n_R$ )], per influent ( $n_{in}$ ) or per effluent ( $n_{eff}$ ) |
| $\Delta n_{L,R}$              | difference of cell numbers (cells mL <sup>-1</sup> ) between successive samples in the respective reactors during an interval $\Delta t$ (d)                          |
| $\overline{n_{L,R}}$          | average of cell numbers (cells mL <sup>-1</sup> ) between successive samples in the respective reactors during an interval $\Delta t$ (d)                             |
| $V_{L,R}$                     | working volume (mL) per reactor                                                                                                                                       |
| $Q_{in}$                      | rate of influent volume per reactor (i.e., influent flow rate, mL d <sup>-1</sup> ), which is manually adjusted per phase in this study (Table S2.1)                  |
| $Q_{eff}$                     | rate of effluent volume per reactor (i.e., effluent flow rate, mL d <sup>-1</sup> )                                                                                   |
| $\mu'$                        | net growth rate (d <sup>-1</sup> ) of cells in a local communities L1-L5 or the regional pool R                                                                       |

1101

1102 The difference in cell numbers ( $\Delta n_{L,R}$ ) between successive samples on day  $i$  and day  $i + \Delta t$  was  
 1103 determined during interval  $\Delta t$  (Eq. S10.4). The average of cell numbers  $\overline{n_{L,R}}$  based on the cell  
 1104 numbers of successive samples and per day were calculated (Eq. S10.5) and used for the  
 1105 calculation of  $\mu'$  during the interval  $\Delta t$ . This was performed for the cell numbers in local  
 1106 communities L1-L5 as well as the regional pool R ( $n_{L,R}$ ).

1107

1108 
$$\Delta n_{L,R} = n_{L,R \text{ at } i+\Delta t} - n_{L,R \text{ at } i}$$
 Eq. S10.4

1109

1110 
$$\overline{n_{L,R}} = (n_{L,R \text{ at } i} + n_{L,R \text{ at } i+\Delta t})/2$$
 Eq. S10.5

1111

### 1112 Calculation of the recycling rate $RC$

1113 Calculation of the recycling rate  $RC$  for the local communities was based on the given dilution rate  
 1114  $D = Q_{eff}/V_{L,R}$ . In this study,  $D$  was 0.72 d<sup>-1</sup>. With fixed working volume  $V_{L,R}$ ,  $Q_{eff}$  was balanced  
 1115 with the sum of the flow rates of the influent<sub>Lin</sub> from the regional pool R ( $Q_{in}$ ) and the influent from

1116 the medium ( $Q_{medium}$ ). The influent<sub>L<sub>in</sub></sub> from the regional pool R ( $Q_{in}$ ) contained cells. On each day,  
 1117 576 mL was exchanged per reactor from which, during times of mass transfer, 10%, 50%, or 80%  
 1118 was taken from the regional pool R (Table S2.1). In the local communities L1-L5, with a given  
 1119  $D$  and a given effluent<sub>L<sub>out</sub></sub> flow rate  $Q_{eff}$ , the influent<sub>L<sub>in</sub></sub> flow rate  $Q_{in}$  was dependent on the recycling  
 1120 rate  $RC$ .

1121

$$1122 \quad Q_{in} = RC \cdot Q_{eff} \quad \text{Eq. S10.6}$$

1123

### 1124 Relationship between net growth rate $\mu'$ and mass transfer rate $M$

1125 In completely mixed reactors,  $n_{eff}$  was considered equal to  $n_{L,R}$ , and for a local communities L1-  
 1126 L5,  $n_{in}$  was considered equal to  $n_R$ . For a local communities, Eq. S10.3 was simplified:

$$1127 \quad \mu' = \frac{\Delta n_L}{\Delta t \cdot n_L} - D \cdot RC \cdot \frac{n_R}{n_L} + D \quad \text{Eq. S10.7}$$

1128

1129 The mass transfer rate  $M$  was quantified by the daily cell number entering the local community  
 1130 ( $Q_{in} \cdot n_{in}$ ) in relation to the cell number present in the respective local community ( $V_L \cdot n_L$ ):

1131

$$1132 \quad M = \frac{Q_{in} \cdot n_{in}}{V_L \cdot n_L} = D \cdot RC \cdot \frac{n_R}{n_L} \quad \text{Eq. S10.8}$$

1133

1134 By this,  $M$  was determined by the dilution rate and the recycling rate ( $D \cdot RC$ ) and the relative  
 1135 difference of cell numbers between the regional pool and respective local community ( $\frac{n_R}{n_L}$ ).

1136 Then, Eq. S10.7 was replaced as:

$$1137 \quad \mu' = \frac{\Delta n_L}{\Delta t \cdot n_L} + (D - M) \quad \text{Eq. S10.9}$$

1138

1139 The net growth rate  $\mu'$  is thus dependent on the difference between dilution rate  $D$  and mass  
 1140 transfer rate  $M$ , which characterizes the influence of emigration or immigration and the relative  
 1141 increase or decrease in cell numbers  $\frac{\Delta n_L}{\Delta t \cdot n_L}$ .

1142 The ideal relationship among  $\mu'$ ,  $D$  and  $M$  is shown for a local community in the case of an  
 1143 increase of  $RCs$  (Fig. S10.1). In an ideal relationship, the net growth rate  $\mu'$  decreases when the  
 1144 mass transfer rate  $M$  increases at a given  $D$  (from  $M1$  to  $M3$ ). Under these circumstances, the  
 1145 increase in  $M$  would initially cause an increase in cell numbers (Fig. S10.2). After adaptation and  
 1146 when  $\mu'$  is equal to the newly adjusted ( $D - M$ ) under balanced growth conditions [i.e.  $\mu' -$

1147 ( $D - M) = 0$ ], a successive phase-to-phase decrease of  $\mu'$  will occur with further increase of  $M$ .  
 1148 Instead, if there is no  $M$  and  $D$  remains unchanged, the cell numbers will remain stable with  $\mu' =$   
 1149  $D$  after an adaptation period. If  $M$  is stopped after periods of various mass transfer rates, the net  
 1150 growth rate will equal  $D$  again ( $\mu' = D$ ), which will also lead to a decrease in cell numbers to their  
 1151 original values (Fig. S10.2). In comparison to hypothesized patterns of cell number change (Fig.  
 1152 S10.2), the experimentally counted cell numbers (Fig. S5.2) showed a less clear pattern at phases  
 1153 1-3. However at  $RC_{80}$  and Insular II, cell number changed drastically in the adaptation periods  
 1154 while fluctuating around a plateau in the balanced periods, which fitted our hypothesis (Fig. S5.2).

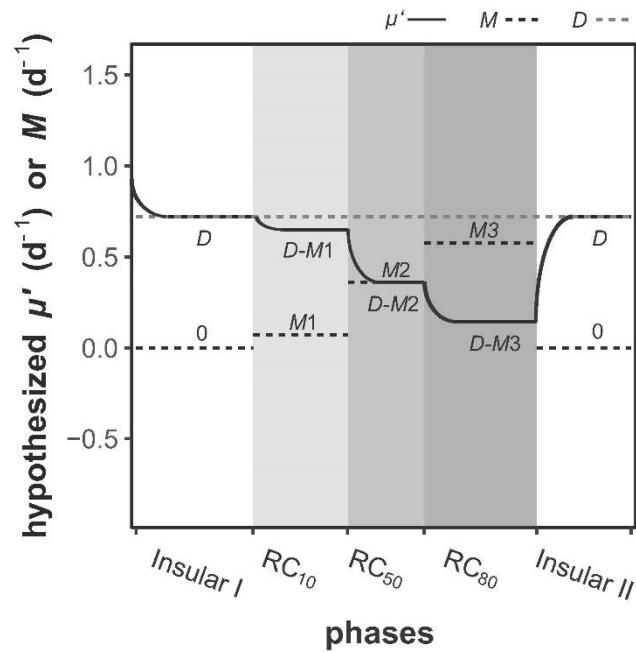

1155  
 1156 **Figure S10.1** Hypothesized ideal dynamics of the net growth rate  $\mu'$  (the black line) and the mass transfer  
 1157 rate  $M$  (dotted black line) after increases in recycling rates  $RC$  in a local community.  $D$ : dilution rate (dashed  
 1158 grey line). Under ideal balanced conditions with unvarying cell numbers ( $\Delta n_L = 0$ ) and if the cell number of  
 1159 the influent from the regional pool  $R$  ( $n_R$ ) is equal to the cell number in the respective local community ( $n_L$ ),  
 1160 then the transfer rate is  $M = D \cdot RC$  and the net growth rate  $\mu' = D - M$ .  $M$  can be calculated for known  $RC$   
 1161 values:  $M1 = 0.1D$  ( $RC_{10}$ ),  $M2 = 0.5D$  ( $RC_{50}$ ),  $M3 = 0.8D$  ( $RC_{80}$ ). The shaded areas represent different  
 1162 phases with changed  $RC$ .

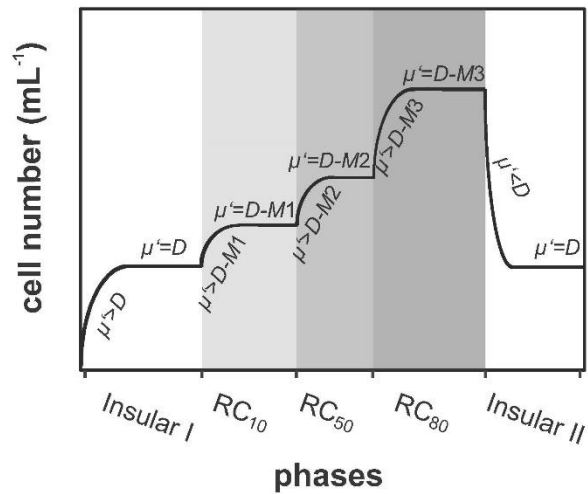

1163  
 1164 **Figure S10.2** Hypothesized ideal dynamics of the cell number (cells mL<sup>-1</sup>) in a local community after  
 1165 increases in recycling rates  $RC$ .  $\mu'$ : net growth rate,  $D$ : dilution rate,  $M$ : mass transfer rate. The cell  
 1166 numbers increase during the adaptation period when an increase in the mass transfer rate ( $M$ ) causes an  
 1167 imbalance with  $\mu' > D - M$ . The net growth rate  $\mu'$  will equal  $(D - M)$  after the adjustment to balanced  
 1168 conditions  $\mu' = D - M$ . Under balanced conditions, cell numbers do not change ( $\Delta n_L = 0$ ). The shaded  
 1169 areas represent different phases with changed  $RC$ .

1170  
 1171 In our study, the following ideal values for  $M$  were expected for the proposed experimental setup  
 1172 when conditions return to balanced situations ( $\Delta n_L = 0$ ) and cell numbers of influent<sub>Lin</sub> (i.e.  
 1173 regional pool R) are equal to cell numbers in the local community ( $n_R = n_L$ ). With changing  $RCs$ ,  
 1174  $M$  will also change, such as for  $M1 = 0.1D = 0.072 \text{ d}^{-1}$  ( $RC_{10}$ );  $M2 = 0.5D = 0.36 \text{ d}^{-1}$  ( $RC_{50}$ ) and  
 1175  $M3 = 0.8D = 0.576 \text{ d}^{-1}$  ( $RC_{80}$ ). Corresponding to Eq. S10.9,  $\mu' = D - M$ , the net growth rate can  
 1176 theoretically be calculated to be  $0.648 \text{ d}^{-1}$  ( $RC_{10}$ ),  $0.36 \text{ d}^{-1}$  ( $RC_{50}$ ) and  $0.144 \text{ d}^{-1}$  ( $RC_{80}$ ). For  
 1177 comparison, the average values of experimental  $M$  of L1-L5 were for  $RC_{10}$   $0.06 \pm 0.02 \text{ d}^{-1}$ ; for  
 1178  $RC_{50}$   $0.30 \pm 0.06 \text{ d}^{-1}$ ; and for  $RC_{80}$   $0.59 \pm 0.05 \text{ d}^{-1}$ , while the average values of calculated  $\mu'$  were  
 1179  $0.69 \pm 0.27 \text{ d}^{-1}$ ,  $0.51 \pm 0.42 \text{ d}^{-1}$  and  $0.20 \pm 0.18 \text{ d}^{-1}$  (Table S10.1, Dataset S6). Thus, the  
 1180 experimental  $M$  and  $\mu'$  values nearly reached the hypothesized values of Fig. S10.1.

1181  
 1182 **Produced cell numbers in local communities L1-L5**

1183 The absolute cell numbers increased from  $1.28 \pm 0.74 \times 10^{12}$  cells per 800 mL in Insular I phase  
 1184 to  $4.23 \pm 1.11 \times 10^{12}$  per 800 mL in  $RC_{80}$  (Table S10.1). To determine whether this increase in cell  
 1185 number was caused by mass transfer or by real cell production within reactors, the production of  
 1186 individual cells (PC) per reactor per day (cells d<sup>-1</sup>) was calculated. For this calculation, the net

1187 growth rate  $\mu'$  per reactor was used. In addition, the term  $\overline{n_{L,R}}$  was considered as the mean of the  
 1188 cell numbers in the same period for which  $\mu'$  was calculated.

1189

$$1190 \quad PC = \mu' \times V_{R,L} \times \overline{n_{L,R}} \quad \text{Eq. S10.10}$$

1191

1192 The increase in  $M$  and the decrease in  $\mu'$  in recycling phases RC<sub>10</sub>-RC<sub>80</sub> did not markedly  
 1193 influence the number of produced cells per day and reactor (PC). Only in RC<sub>80</sub> was the PC value  
 1194 slightly lower. The data indicate that nutrients placed no limitation on growth in most phases. Only  
 1195 the ammonium concentration decreased to lower values in RC<sub>80</sub> and also in R (Fig. S3.1), which  
 1196 supports the lowered PC for RC<sub>80</sub>. The values of PC,  $M$  and  $\mu'$  are shown in Table S10.1 and  
 1197 Dataset S6.

1198

1199 **Table S10.1** Summary of experimental  $M$ ,  $\mu'$  and PC values per day and at reactors L1-L5. The mean  $\pm$   
 1200 sd values were all calculated among local communities L1-L5 during balanced periods. All negative values  
 1201 were set to zero before averaging.

| comparison L1-L5                                                               | Insular I       | RC <sub>10</sub> | RC <sub>50</sub> | RC <sub>80</sub> | Insular II       |
|--------------------------------------------------------------------------------|-----------------|------------------|------------------|------------------|------------------|
| experimental $M$ (d <sup>-1</sup> )                                            | 0               | 0.06 $\pm$ 0.02  | 0.30 $\pm$ 0.06  | 0.59 $\pm$ 0.05  | 0                |
| experimental $\mu'$ (d <sup>-1</sup> )                                         | 0.71 $\pm$ 0.27 | 0.69 $\pm$ 0.27  | 0.51 $\pm$ 0.42  | 0.20 $\pm$ 0.18  | 0.79 $\pm$ 0.31  |
| cell numbers per reactor<br>(800 mL, $\times 10^{12}$ cells mL <sup>-1</sup> ) | 1.28 $\pm$ 0.74 | 1.46 $\pm$ 0.52  | 1.97 $\pm$ 0.57  | 4.23 $\pm$ 1.11  | 1.26 $\pm$ 0.50  |
| PC per reactor<br>(800 mL, $\times 10^{12}$ cells d <sup>-1</sup> )            | 0.94 $\pm$ 0.56 | 0.99 $\pm$ 0.49  | 1.01 $\pm$ 0.74  | 0.85 $\pm$ 0.72  | 1.01 $\pm$ 40.49 |

1202

1203

1204

### 1205 **S11: Quantification of the net growth rate per subcommunity $\mu' SC_x$**

1206 Similar to the community net growth rate ( $\mu'$ , Supplementary Information S10), the net growth rate  
 1207 was calculated for each SC. At the SC-level, the net growth rate ( $\mu' SC_x$ ) of each SC per phase  
 1208 and reactor and time  $\Delta t$  was calculated only for the balanced growth phases (Dataset S7). Overall,  
 1209 2,400 SCs were evaluated for each of the local and regional communities and per phase. In each  
 1210 phase, if an SC was never dominant ( $\leq 1.25\%$  relative cell abundance per SC), it was excluded  
 1211 from the evaluation. The criterion  $\mu' SC_x \geq 0$  was chosen to differentiate the various degrees of  
 1212 net growth  $\mu' SC_x$  of cells in the SCs (Fig. 11.1d). For the determination of  $\mu' SC$ , the absolute cell  
 1213 abundance per SC was used (Fig. S8.2).

1214

1215 The change in cell numbers per SC during interval  $\Delta t$  (d) was determined by cell numbers per SC  
 1216 originating from the influent, cell numbers per SC lost by the effluent and the net growth rate  $\mu'_{SC}$   
 1217 of the cells per SC within  $\Delta t$  (d). According to the biomass balance shown in Eq. S11.1, the  $\mu'_{SC}$   
 1218 can be calculated similar to  $\mu'$  using Eq. S11.2 by specifying the values for  $SC_x$  ( $x = 1-80$  for 80  
 1219 SCs in total):

$$\Delta nSC_{x,L,R} \cdot V_{L,R} = \mu'_{SC_x} \cdot V_{L,R} \cdot nSC_{x,L,R} \cdot \Delta t + Q_{in} \cdot nSC_{x,in} \cdot \Delta t - Q_{eff} \cdot nSC_{x,eff} \cdot \Delta t$$

Eq. S11.1

1222 with:

| symbol                                             | description                                                                                                                                                                                                      |
|----------------------------------------------------|------------------------------------------------------------------------------------------------------------------------------------------------------------------------------------------------------------------|
| $nSC_{x,L,R}$ ,<br>$nSC_{x,in}$ &<br>$nSC_{x,eff}$ | absolute cell abundances in $SC_x$ (cells mL <sup>-1</sup> ) per reactor [local communities ( $nSC_{x,L}$ ) and regional pool ( $nSC_{x,R}$ )], per influent ( $nSC_{x,in}$ ) or per effluent ( $nSC_{x,eff}$ ). |
| $\Delta nSC_{x,L,R}$                               | difference of absolute cell abundances in $SC_x$ (cells mL <sup>-1</sup> ) between successive samples in the respective reactors during interval $\Delta t$ (d)                                                  |
| $\overline{nSC_{x,L,R}}$                           | average of absolute cell abundances in $SC_x$ (cells mL <sup>-1</sup> ) between successive samples in the respective reactors during interval $\Delta t$ (d)                                                     |
| $\mu'_{SC_x}$                                      | the net growth rate (d <sup>-1</sup> ) of cells in $SC_x$ in local communities L1-L5 or regional pool R                                                                                                          |

1223  
 1224 The difference in cell numbers per  $SC_x$  ( $\Delta nSC_{x,L,R}$ ) between successive samples was determined  
 1225 for the interval  $\Delta t$  (Eq. S11.2). The average cell numbers per  $SC_x$  ( $\overline{nSC_{x,L,R}}$ ) based on the cell  
 1226 numbers per SC of successive samples and per day were calculated (Eq. S11.3) and used for  
 1227 the calculation of  $\mu'_{SC_x}$  for interval  $\Delta t$ . This was done for the cell numbers of  $SC_x$  in local  
 1228 communities L1-L5 and in the regional pool R ( $nSC_{x,L,R}$ ).

$$\Delta nSC_{x,L,R} = nSC_{x,L,R \text{ at } i+\Delta t} - nSC_{x,L,R \text{ at } i} \quad \text{Eq. S11.2}$$

$$\overline{nSC_{x,L,R}} = (nSC_{x,L,R \text{ at } i} + nSC_{x,L,R \text{ at } i+\Delta t})/2 \quad \text{Eq. S11.3}$$

1234 For a simplified determination of  $\mu'_{SC_x}$  in the local communities L1-L5, we assumed that the  
 1235 absolute cell abundance in the effluent<sub>out</sub>  $nSC_{x,eff}$  is equal to the absolute cell abundance of the  
 1236 local communities L1-L5  $nSC_{x,L}$ , and the absolute cell abundance in the influent<sub>in</sub>  $nSC_{x,in}$  is equal



1237 to absolute cell abundance in the regional pool R  $nSC_{x,R}$ . For  $SC_x$  in a local community, Eq. S11.1  
 1238 was simplified:

1239

$$1240 \quad \mu' SC_x = \frac{\Delta nSC_{x,L}}{\Delta t \cdot nSC_{x,L}} - D \cdot RC \cdot \frac{nSC_{x,R}}{nSC_{x,L}} + D \quad \text{Eq. S11.4}$$

1241

1242 For a simplified determination of  $\mu' SC_x$  in the regional pool R, we assumed that the absolute cell  
 1243 abundance in the effluent<sub>Rout</sub>  $nSC_{x,eff}$  is equal to the absolute cell abundance of the regional pool  
 1244 R  $nSC_{x,R}$ , and the absolute cell abundance in the influent<sub>Rin</sub>  $nSC_{x,in}$  is equal to the absolute cell  
 1245 abundance in the local communities  $nSC_{x,L}$ . To calculate the cell numbers per SC entering the  
 1246 regional pool R ( $nSC_{x,in}$ ) from five local communities (see setup of reactor in Fig. 1), the average  
 1247 of the cell numbers of  $SC_x$  [ $SUM(nSC_{x,L})/5$ ] was used. Therefore, from Eq. S11.1, the calculation  
 1248 of  $\mu' SC_x$  in the regional pool R was simplified:

1249

$$1250 \quad \mu' SC_x = \frac{\Delta(nSC_{x,R})}{\Delta t \cdot nSC_{x,R}} - 5D \cdot \frac{SUM(nSC_{x,L})}{5 \cdot nSC_{x,R}} + 5D \quad \text{Eq. S11.5}$$

1251

1252 **Calculation of  $\mu' SC_x$  on the basis of experimental data**

1253 In our study,  $\mu' SC_x$  was determined on the basis of cell numbers per  $SC_x$ . The cell number per  
 1254  $SC_x$  was measured under the influence of the mass transfer at varying  $RC$ s on a daily basis. The  
 1255 balanced periods of the different phases were chosen as  $\Delta t$ . For the calculation of  $\mu' SC_x$  over  $\Delta t$ ,  
 1256 the starting days  $i$  (days 7, 33, 54, 71, 96) and ending days  $i + \Delta t$  (days 26, 47, 64, 89, 107) were  
 1257 chosen. The detailed values for  $\mu' SC_x$  per  $SC_x$  during the balanced periods of the different phases  
 1258 are presented for the local communities and the regional pool in Dataset S7. For each phase,  
 1259  $\mu' SC_x$  ( $x = 1-80$ ) was calculated for the dominant SCs (relative cell abundance  $> 1.25$  in at least  
 1260 one sample during the corresponding periods) in L1-L5 and R (Fig. 4).

1261 The  $\mu' SC_x$  of most of the SCs showed positive growth in the local communities L1-L5. Others  
 1262 showed zero growth (blue dots in Fig. 4). Among those that showed zero growth were also those  
 1263 that were negative. The negative values originated from huge variations in cell numbers in the  
 1264 local communities L1-L5 compared to the relatively unchanged ones from the regional pool R  
 1265 (Table S5.1). To prevent an overestimation, we set all seemingly negative growth rates to zero.  
 1266 Similar to  $\mu'$  for the whole-community,  $\mu' SC_x$  showed a decreasing trend with increased  $RC$  (Fig.  
 1267 4). During phases of insular growth,  $\mu' SC_x$  must have been at least equal to  $D$  in local  
 1268 communities; otherwise, SCs with  $\mu' SC_x < D$  would run the risk of being washed out. Once the

1269 mass transfer  $M$  had diminished the danger of a wash out due to back-cycling of cells,  $\mu' SC_x$  was  
 1270 adjusted to the actual  $D - M$ . Thus, cells in  $SC_x$  were present in the system with a  $\mu' SC_x$  smaller  
 1271 than  $D$ . In the regional pool R, there was no influent of fresh medium, and most SCs showed no  
 1272 net growth ( $\mu' SC_x$ , blue circles in Fig.4) due to severe limitations in nutrients (e.g. ammonium  
 1273 decreased from  $27.18 \pm 11.22$  mg N L<sup>-1</sup> in local communities to  $12.46 \pm 8.50$  mg N L<sup>-1</sup> in the  
 1274 regional pool R). Cells entered R at high rates from the local communities L1-L5 where the  
 1275 nutrients were already limited. Consequently, there was minimal capacity for growth.

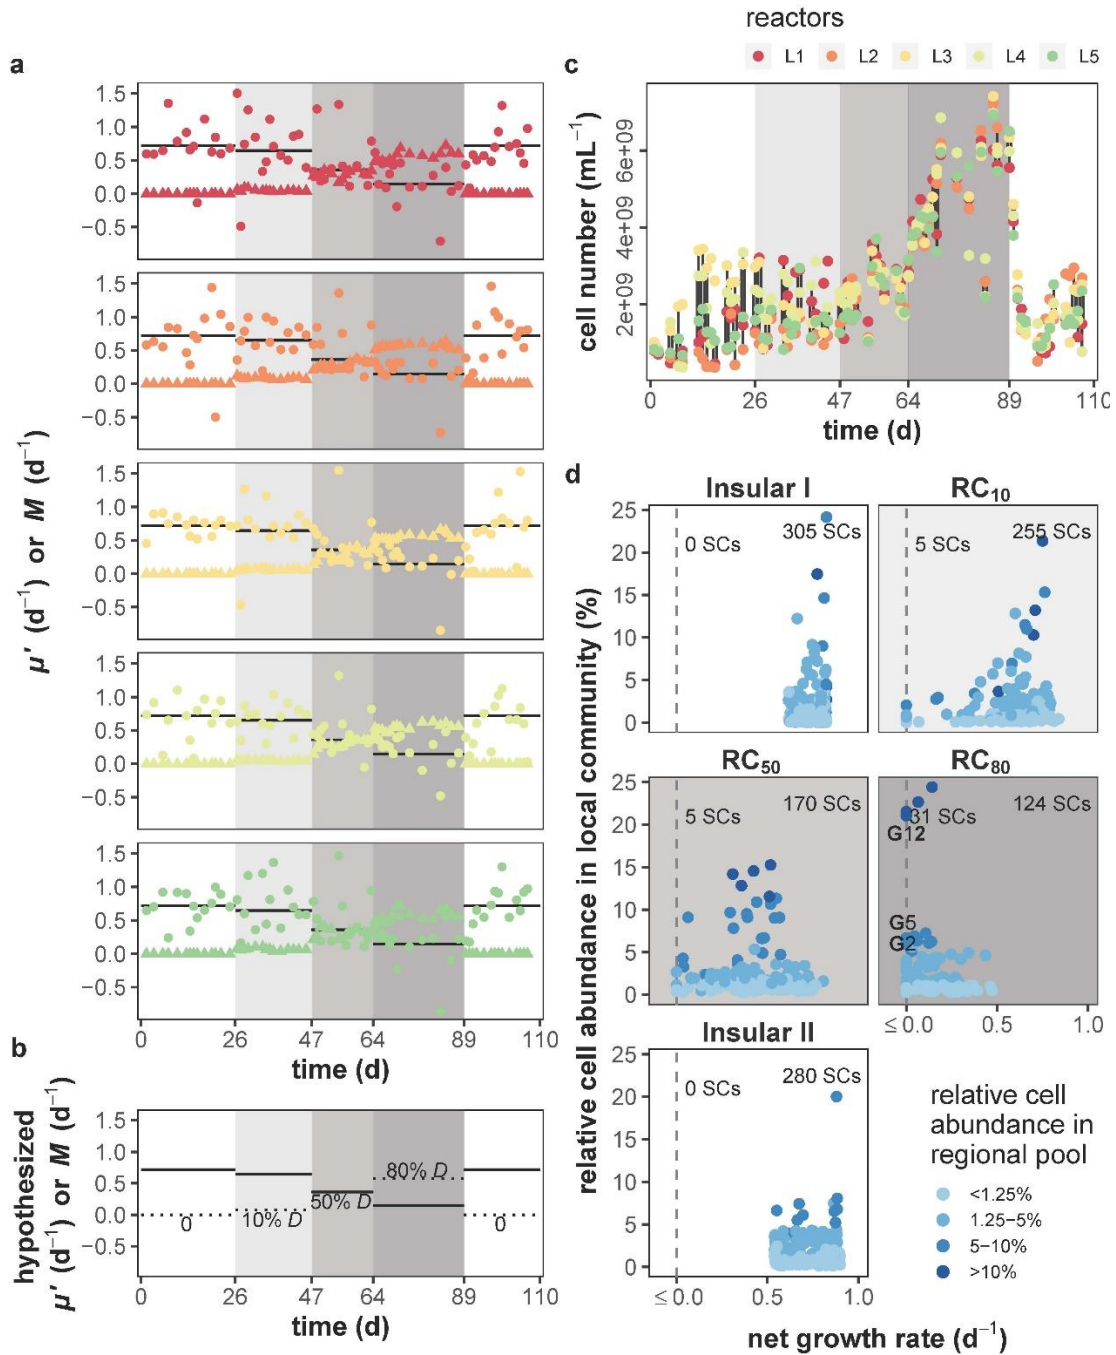

1276

1277 **Figure S11.1** Net growth rates of microbiomes and subcommunities during increasing recycling rates  $RC$   
 1278 and mass transfer rates  $M$ . **a)** Net growth rate  $\mu'$  (closed circles) and mass transfer rate  $M$  (closed triangle)  
 1279 of the local microbiomes L1-L5. The hypothesized values for  $\mu'$  (black line) are also shown. **b)** Hypothetical  
 1280  $M$  (black dotted line) and  $\mu'$  (black line) values calculated for the experimental setup. **c)** Absolute cell  
 1281 numbers for each of L1-L5. **d)** Net growth rates of all dominant SCs ( $\mu' SC_x$ ) of L1-L5. Each point stands for  
 1282 one SC. Heights of points on the y-axis indicate relative average cell abundance per SC during the balanced  
 1283 period per local community. The blue shades show the relative average cell abundance of the same SC in  
 1284 the regional pool R. The vertical grey dashed line indicates  $\mu' SC_x = 0$ . The numbers of dominant SCs with  
 1285  $\mu' SC_x = 0$  and  $\mu' SC_x > 0$  are marked. With  $\mu' SC_x = 0$ , G12, G5 and G2 were the most abundant ones  
 1286 (relative average cell abundance > 5%) in L1-L5 at  $RC_{80}$ . The grey shades in the background of all graphs  
 1287 indicate the five phases Insular I phase,  $RC_{10}$ ,  $RC_{50}$ ,  $RC_{80}$  and Insular II phase.  
 1288  
 1289

## 1290 S12: Effect of the recycling rate $RC$ on the presence of SC

1291 To determine the influence of the recycling rate  $RC$  on absolute cell abundance per SCs (cell  
 1292 number,  $mL^{-1}$ ), the R package 'Hmisc' (24) and the Pearson's correlation test were used. All SCs  
 1293 from local communities L1-L5 and balanced periods were tested (Fig. S12.1). The test revealed  
 1294 a total of five SCs, which increased their absolute cell numbers to at least  $10^8$  cells  $mL^{-1}$  with  
 1295 increasing  $RC$  and showed a high correlation coefficient  $|r_{hol}| \geq 0.55$ ,  $p \leq 0.05$ . These gates  
 1296 were G5, G12, G13, G14 and G33. All of them were shown to be involved in net growth and  
 1297 rescue under mass transfer (Supplementary Information S11, Fig. 4).

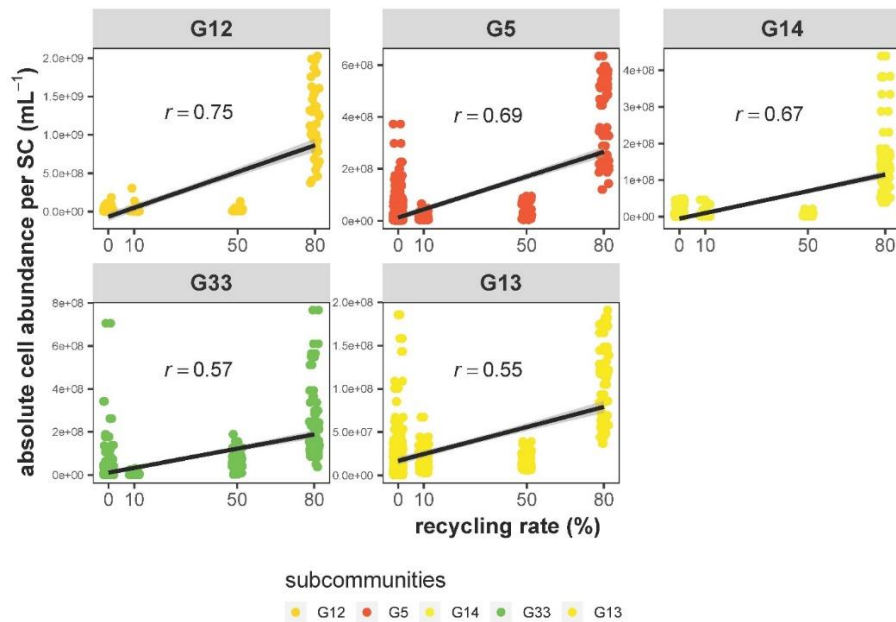

1298

1299 **Figure S12.1** The correlations between absolute cell abundance per SC and *RC*. Only samples from the  
 1300 balanced period were used for analysis, and only correlations with a Pearson's correlation coefficient ( $r$ ) >  
 1301 0.55 and SCs with absolute cell numbers increased to at least  $10^8$  cells  $\text{mL}^{-1}$  are listed ( $p \leq 0.05$ ). The line  
 1302 in each sub-plot indicates linear fitting, while the  $r$  value represents Pearson's correlation coefficient. The  
 1303 colors indicate the SCs.

1304  
 1305 In addition, the strength of the regional pool R to shape local communities L1-L5 in their different  
 1306 phases via mass transfer was tested for all communities including all SCs (from both the  
 1307 adaptation and balanced periods, Fig. S12.2). The data show that, as *RC* increased (particularly  
 1308 at  $RC_{80}$ ), fewer SCs responded to mass transfer, but they did so with higher relative abundance  
 1309 per SC. At the same time, SCs tended to have similar relative cell abundances between L1-L5  
 1310 and R. This is another indication that mass transfer synchronized L1-L5 via R. At Insular I and II  
 1311 phases, there was no correlation of cell abundance per SC between L1-L5 and R and an increase  
 1312 in the variety of dominant SCs. Clearly, the regional pool R shaped the local communities L1-L5.  
 1313

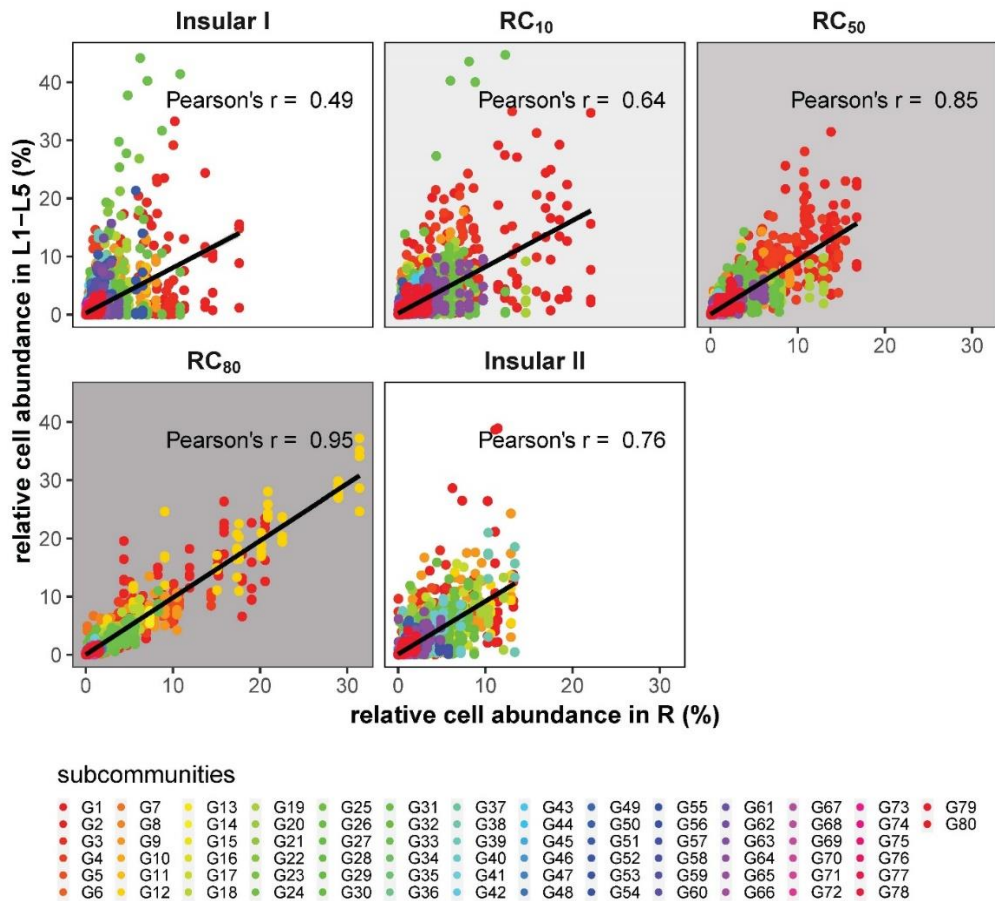

1314

1315 **Figure S12.2** Relationship between relative cell abundance per SC in local communities L1-L5 and the  
 1316 regional pool R. The line in each sub-plot indicates linear fitting, labelled with Pearson's correlation  
 1317 coefficient  $r$ . The shaded areas represent different phases with changed  $RC$ .

1318  
 1319

### 1320 **S13: Relationship between biotic and abiotic parameters**

1321 To analyze whether operational reactor conditions influenced the communities structures over  
 1322 114 generations, the correlations of SCs versus biotic or abiotic parameters (SC vs. Para) but  
 1323 also between SCs (SC vs. SC) were tested. Spearman's rank order correlation coefficient was  
 1324 used for this purpose. For this analysis, the relative cell abundances of SCs from both the  
 1325 adaptation and the balanced periods were used. The following biotic and abiotic parameters were  
 1326 included in the analysis: pH, electrical conductivity (EC), ammonium, total phosphate (PHOt), total  
 1327 chemical oxygen demand (CODt), supernatant chemical oxygen demand (CODs), biological  
 1328 chemical oxygen demand (CODb), OD and cell number (Fig. S3.1). The lists of all strong  
 1329 correlations [Spearman's rank order correlation coefficient  $|\rho| \geq 0.75$ ,  $p \leq 0.05$ , corrected  
 1330 according to the Benjamini-Hochberg method (25)] are given as Dataset S8 for SC vs. SC  
 1331 correlations and Dataset S9 for SC vs. Para correlations. The numbers of those correlations are  
 1332 summarized in Table S13.1. Both analyses were performed with the R package 'Hmisc' (24).

1333

1334 **Table S13.1** The numbers of significant correlations of SC vs. SC and SC vs. Para are summarized for the  
 1335 local communities L1-L5 and the regional pool R per phase. Numbers of correlations in L1-L5 are averaged  
 1336 as mean  $\pm$  sd. The significant correlations were estimated using Spearman's rank order correlation  
 1337 coefficient  $|\rho| \geq 0.75$ ,  $p \leq 0.05$ , corrected according to the Benjamini-Hochberg method (25). Relative  
 1338 cell abundances were used for the analyses. SC: all subcommunities, Para: biotic and abiotic bulk  
 1339 parameters (Fig. S3.1, without DW).

| community     | Insular I phase |              | RC <sub>10</sub> |              | RC <sub>50</sub> |              | RC <sub>80</sub> |              | Insular II phase |              |
|---------------|-----------------|--------------|------------------|--------------|------------------|--------------|------------------|--------------|------------------|--------------|
|               | SC vs. SC       | SC vs. Para. | SC vs. SC        | SC vs. Para. | SC vs. SC        | SC vs. Para. | SC vs. SC        | SC vs. Para. | SC vs. SC        | SC vs. Para. |
| L1            | 234             | 11           | 149              | 20           | 284              | 52           | 259              | 37           | 320              | 52           |
| L2            | 250             | 14           | 272              | 28           | 308              | 71           | 193              | 56           | 182              | 24           |
| L3            | 227             | 8            | 234              | 17           | 363              | 64           | 316              | 47           | 263              | 35           |
| L4            | 234             | 26           | 364              | 45           | 359              | 72           | 246              | 41           | 210              | 53           |
| L5            | 158             | 21           | 228              | 18           | 255              | 64           | 274              | 55           | 277              | 51           |
| mean $\pm$ sd | 221 $\pm$ 36    | 16 $\pm$ 7   | 249 $\pm$ 78     | 26 $\pm$ 12  | 314 $\pm$ 47     | 65 $\pm$ 8   | 258 $\pm$ 45     | 47 $\pm$ 8   | 250 $\pm$ 55     | 43 $\pm$ 13  |
| R             | 283             | 69           | 292              | 30           | 295              | 68           | 335              | 44           | 319              | 99           |

1340

1341 To test whether the newly assembled community members also established an interconnected  
 1342 relationship and changed their interaction potential due to mass transfer, the numbers of

1343 significant correlations of SC vs. SC and between SC and the immediate environment of the  
1344 microorganisms, SC vs. Para (biotic and abiotic parameters) were counted based on relative cell  
1345 numbers in SCs. Generally, more significant correlations were found for SC vs. SC and of those  
1346 more in the recycling phases RC (Table S13.1). The highest number of strong correlations for SC  
1347 vs. SC in L1-L5 was found for RC<sub>50</sub> (mean = 314 ± 47) and RC<sub>80</sub> (mean = 258 ± 45; Wilcoxon  
1348 test: pairwise comparison,  $p = 0.012$  [Insular I vs. RC<sub>50</sub>], 0.222 [RC<sub>10</sub> vs. RC<sub>50</sub>], 0.151 [Insular II  
1349 vs. RC<sub>50</sub>] and 0.143 [Insular I vs. RC<sub>80</sub>], 0.691 [RC<sub>10</sub> vs. RC<sub>80</sub>], 1 [Insular II vs. RC<sub>80</sub>], respectively).  
1350 The number of correlations was much lower for SC vs. Para; however, the trend was the same  
1351 for RC<sub>50</sub> (mean = 65 ± 8) and RC<sub>80</sub> (mean = 47 ± 8; Wilcoxon test: pairwise comparison,  $p =$   
1352 0.112 [Insular I vs. RC<sub>50</sub>], 0.012 [RC<sub>10</sub> vs. RC<sub>50</sub>], 0.027 [Insular II vs. RC<sub>50</sub>] and 0.008 [Insular I vs.  
1353 RC<sub>80</sub>], 0.032 [RC<sub>10</sub> vs. RC<sub>80</sub>], 0.548 [Insular II vs. RC<sub>80</sub>], respectively). These results show the  
1354 highest interaction potentials of SC vs. SC and SC v. Para in phases RC<sub>50</sub> and RC<sub>80</sub>, suggesting  
1355 newly assembled communities by mass transfer.

1356 A number of SCs profited exclusively from the increase in the recycling rates *RC* in phases RC<sub>50</sub>  
1357 and RC<sub>80</sub> (Fig. S12.1, linear correlation coefficient  $|\rho| \geq 0.55$ ,  $p \leq 0.05$ ). Of those, gates G5,  
1358 G12, G14 and G33 showed the highest cell numbers ( $> 1 \times 10^8$  cells mL<sup>-1</sup> on average in RC<sub>80</sub>,  
1359 each) and among them G5, G12 and G14 were also those that were nested during RC<sub>50</sub> or RC<sub>80</sub>  
1360 (Table S8.4). The cells of these SCs were sorted and analyzed by 16S rRNA gene sequencing  
1361 (Supplementary Information S9, step2). The number of interactions between the various SCs was  
1362 found to be generally higher than the interactions between SCs and operational parameters. The  
1363 low number of interactions between SCs and the operational parameters was probably caused  
1364 by the continuous setup of the reactor system. Instead, the high number of interactions between  
1365 SCs under these conditions is contrary to the expected unaltered cell states typical of continuous  
1366 cultivation of pure cultures.

1367 However, the connected net growth and rescue qualities of certain SCs under mass transfer,  
1368 especially at RC<sub>50</sub> and RC<sub>80</sub> (Fig. S12.1), can be considered responsible for reinforcing their  
1369 selection and, concomitantly, the (reversible, phase Insular II) decline of the other SCs (Fig.  
1370 S12.2) can be considered a process that increased the interaction potential between the SCs.

1371  
1372 Finally, we performed a partial Mantel test as used by Wu et al. (26) to statistically test if the  
1373 removal efficiency of CODs, NH<sub>4</sub>, and PHOt (Supplementary Information S3: Tables S3.2-S3.4)  
1374 is connected to community compositional change (via relative cell abundance of all  
1375 subcommunities per sample) caused by increasing mass transfer rates. First, we tested the  
1376 strength of the Spearman correlation between Cell count and CODs, NH<sub>4</sub>, or PHOt. The resulting



1377 Spearman correlation coefficients were: Cell count vs. CODs:  $r_{\text{hol}} = -0.52$ ,  $p = 0$ ; Cell count vs.  
1378  $\text{NH}_4$ :  $r_{\text{hol}} = 0.23$ ,  $p = 3 \times 10^{-4}$ ; Cell count vs. PHOt:  $r_{\text{hol}} = -0.08$ ,  $p = 0.2057$ . The result shows  
1379 that there is only one relatively strong correlation, namely between Cell count and CODs removal  
1380 efficiency.

1381 Second, to perform a partial Mantel test between community compositional data and community  
1382 functional data, we excluded the potential autocorrelation with Cell count (using the R package  
1383 'vegan', 13). For the calculations we used the balanced periods of all phases of all reactors, and  
1384 correlations were performed with 999 permutations. The Bray-Curtis dissimilarity matrix of  
1385 community composition and Euclidean dissimilarity matrixes of Cell count and removal efficiency  
1386 were calculated using the R package 'vegan' (13). The partial Mantel test correlation coefficient  
1387  $r_m$  shows that neither CODs,  $\text{NH}_4$ , nor PHOt (here at least not strongly) removal efficiency was  
1388 significantly correlated with community composition (partial Mantel test,  $r_m = -0.0838$ ,  $p = 0.999$   
1389 for CODs removal;  $r_m = 0.0144$ ,  $p = 0.697$  for  $\text{NH}_4$  removal;  $r_m = 0.1066$ ,  $p = 0.002$  for PHOt  
1390 removal).

1391 As an outcome, although the mass transfer rates changed, we found that the CODs,  $\text{NH}_4$ , and  
1392 PHOt removal efficiencies did not change. Therefore, the partial Mantel test verified that  
1393 community changes did not influence community function in our metacommunity setup. We can  
1394 assume that this behavior is caused by the functional redundancy that is typical for wastewater  
1395 communities.

1396

1397

#### 1398 [S14: Assessment of the proportions of deterministic and stochastic processes during](#) 1399 [mass transfer](#)

1400 Recently, it has been acknowledged that deterministic and stochastic processes shape the  
1401 community assembly together. Rather than qualitatively determine the community assembly,  
1402 quantitative tools have been developed to calculate the ratios of deterministic and stochastic  
1403 processes (27). More specifically, several processes can be defined within ecological frameworks,  
1404 termed as 'variable/heterogeneous selection', 'homogenizing/homogeneous selection', 'dispersal  
1405 limitation', 'homogenizing dispersal' and 'undominated/drift' (28-30).

1406 To better understand the community assembly processes under different levels of mass transfer,  
1407 following our previous work (1, 31), we used three different quantitative tools: NST (Normalized  
1408 Stochasticity Ratio, 27) analysis was based on flow cytometric data, while the other two tools  
1409 require phylogenetic information from ASVs (amplicon sequence variants), such as QPEN



1410 (Quantifying assembly Processes based on Entire-community Null model analysis, 28) and  
1411 iCAMP (Community Assembly Mechanisms by Phylogenetic-bin-based null model analysis, 30).  
1412 All three methods were performed at each time point, comparing pairwise local communities L1-  
1413 L5 or local communities with the regional pool R that were within the bounded metacommunity  
1414 (27).

1415

### 1416 **Normalized Stochasticity Ratio (NST) analysis**

1417 According to Ning et al. (27), the NST analysis considers two scenarios of deterministic processes  
1418 that cause communities to be more similar (type A) or more dissimilar (type B) than the simulated  
1419 communities based on null model (a community is assembled by random forces only, and  
1420 stochasticity is theoretically 100%). Community simulation is the computational process in which  
1421 virtual communities are created multiple times (1000 times):

1422 1) The relative cell abundance data of the subcommunities are converted to presence-absence  
1423 data of cells in dominant subcommunities (relative cell abundance > 1.25%);

1424 2) The observed occurrence frequency of cells in each of the dominant subcommunities in all  
1425 samples is calculated using all samples;

1426 3) Then, a virtual assembly of the simulated community is performed by a repeated random  
1427 selection of individuals from these dominant subcommunities, and the probabilities of how often  
1428 individuals of these subcommunities are included in the assembly of a simulated community are  
1429 proportional to the observed occurrence frequencies of these subcommunities.

1430 The Jaccard dissimilarities are calculated between pairwise simulated communities, and an  
1431 average of these values is computed. Therefore, the difference between the observed values  
1432 from our data and the average values of the simulated community, representing the theoretical  
1433 null model (stochasticity = 100%), was used to assess the strength of deterministic processes of  
1434 community assembly in the observed community. The strength of stochastic processes was  
1435 assessed by subtracting the determinism of the observed community from 100% (these values  
1436 were further normalized to scale to 100%, taking into account the extreme values at full  
1437 deterministic and stochastic assembly). The resulting NST values were tested by bootstrapping  
1438 (1000 times) and represented by mean values (black dots) with error bars (black lines) from the  
1439 bootstrapping test in Fig. S14.1.

1440

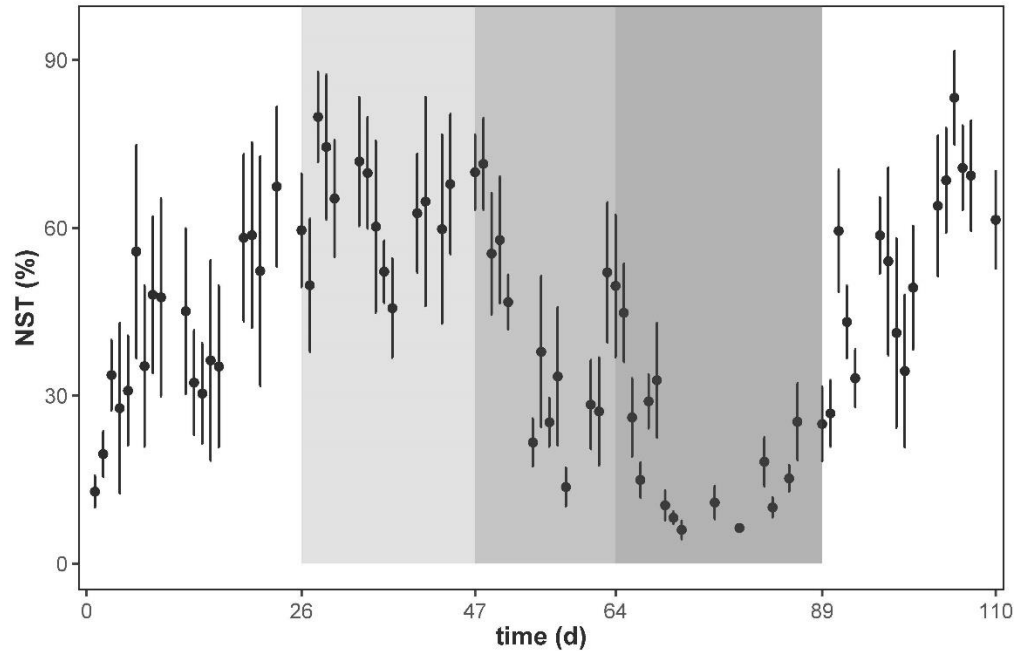

1441  
 1442 **Figure S14.1** The relative importance of stochastic processes in community assembly over time, indicated  
 1443 by the index NST (Normalized Stochasticity Ratio, 27), by comparing local communities L1-5 based on flow  
 1444 cytometric data.

1445  
 1446 The community assembly was determined by both stochastic and deterministic processes (Fig.  
 1447 S14.1). Stochastic processes were particularly high in the insular phases (maximum 83% in the  
 1448 Insular II phase). While in the Insular I phase the stochasticity increased after the community  
 1449 adapted to the cultivation conditions, in Insular II phase the community reorganized itself after  
 1450 mass transfer to the insular conditions. Stochasticity was still high in phase 2 (RC<sub>10</sub>), but  
 1451 decreased to minimum 6% during phase 4 (RC<sub>80</sub>). The NST analysis of Ning et al. (27) supports  
 1452 our findings that mass transfer reduces stochasticity and synchronizes parallel running multiple  
 1453 communities. According to the definition of Ning et al. (27), which states that community assembly  
 1454 is more deterministic when NST < 50%, and more stochastic when NST > 50%, we can conclude  
 1455 that through mass transfer at RC<sub>50</sub> and especially at RC<sub>80</sub>, a community is mainly assembled by  
 1456 deterministic processes and stochastic processes hardly play any role anymore.

1457  
 1458 [Quantifying assembly processes based on Entire-community Null model analysis \(QPEN\)](#)

1459 Using QPEN, Stegen et al. (28) investigated both phylogenetic turnover and turnover of ASV  
 1460 composition of the entire communities, using  $\beta$ NTI ( $\beta$ -nearest taxon index) and  $\beta$ RC<sub>bray</sub> (Raup-  
 1461 Crick metric based on Bray-Curtis dissimilarity), respectively, to determine ecological processes

1462 (homogenizing selection, variable selection, dispersal limitation, homogenizing dispersal and  
1463 undominant). In principle, high phylogenetic turnover indicates differentiation of niches that select  
1464 for taxa with corresponding habitat preferences, based on the finding that habitat preferences of  
1465 closely phylogenetically related taxa are more similar to each other than habitat preferences of  
1466 distant relatives (32). Therefore, phylogenetic turnover between communities, quantified by  $\beta$ NTI,  
1467 is calculated to determine whether an ecological process is driven by environmental selection:  
1468 1) The (abundance-weighted)  $\beta$ -mean-nearest taxon distance ( $\beta$ MNTD) is calculated between  
1469 pairwise communities, quantifying the phylogenetic distance between each ASV in one  
1470 community and its closest relative in a second community.  
1471 2) The  $\beta$ MNTD value of the null model is calculated by first randomizing ASV names and  
1472 frequencies at the tips of the phylogenetic tree, and then recalculating  $\beta$ MNTD to obtain a null  
1473 value. The randomization and recalculation are repeated 999 times.  
1474 3) The  $\beta$ -nearest taxon index ( $\beta$ NTI) is calculated as the difference between observed  $\beta$ MNTD  
1475 and average null value of  $\beta$ MNTD.  
1476 4)  $\beta$ NTI < -2 or > +2 means that phylogenetic turnover is significantly smaller or larger than the  
1477 null model.  
1478 In the calculation of  $\beta$ RC<sub>bray</sub>, a null model test is also performed using a procedure similar to that  
1479 used in the NST analysis (27). One difference is that a null model in the  $\beta$ RC<sub>bray</sub> calculation uses  
1480 the relative abundances of ASVs. The probabilities that ASVs are included in a simulated  
1481 community are proportional to the average relative abundances of ASVs over all samples. The  
1482 other difference is that Bray-Curtis dissimilarity is used instead of Jaccard dissimilarity. The  
1483 deviation between the observed Bray-Curtis dissimilarity value and the null model value is  
1484 standardized as the  $\beta$ RC<sub>bray</sub> value.  $\beta$ RC<sub>bray</sub> < -0.95 or > +0.95 provide the criteria to determine if  
1485 the observed ASV composition turnover significantly deviates from the null model.  
1486 Stegen et al. (29) summarized the ecological processes as: 1) Homogeneous selection when  
1487  $\beta$ NTI < -2, meaning that communities occur in the same selective environment and selection is  
1488 strong. 2) Variable selection when  $\beta$ NTI > +2, implying that communities are assembled in  
1489 different selective environments. 3) Dispersal limitation when  $|\beta$ NTI| < 2 and  $\beta$ RC<sub>bray</sub> > +0.95,  
1490 which means a community has no influence on other communities and drift acts alongside  
1491 dispersal limitation. 4) Homogenizing dispersal when  $|\beta$ NTI| < 2 and  $\beta$ RC<sub>bray</sub> < -0.95, which means  
1492 a high rate of dispersal homogenizes communities. 5) Undominated when  $|\beta$ NTI| < 2 and  $|\beta$ RC<sub>bray</sub>  
1493 < 0.95, which means there is a moderate rate of dispersal and selection is relatively weak (28,  
1494 29).

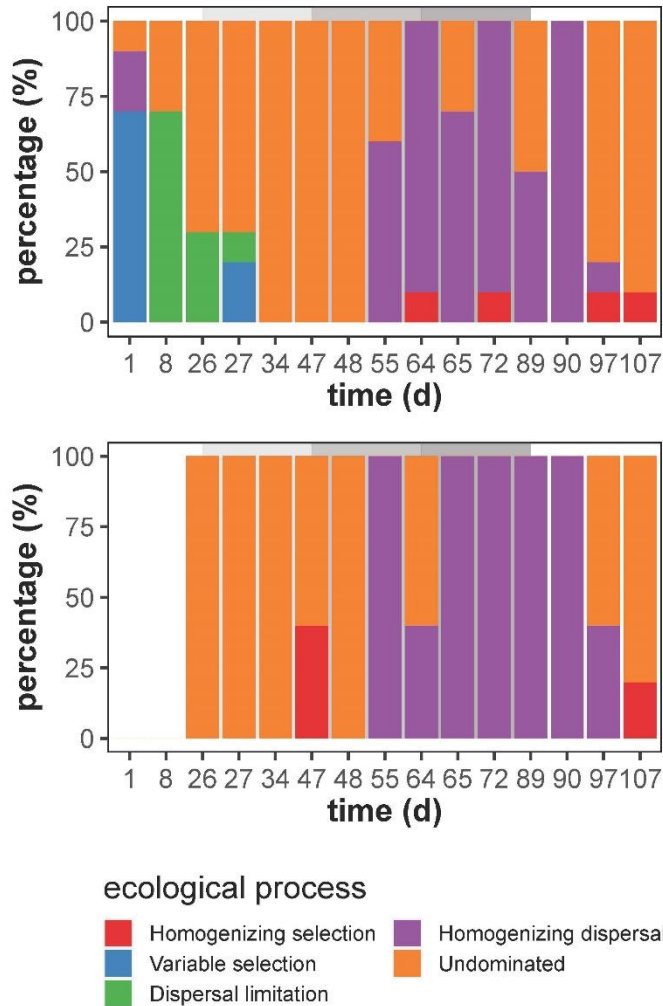

1495

1496 **Figure S14.2** The percentages of ecological processes (28, 29) of community assembly over time,  
 1497 comparing between local communities (top), and between local communities and regional pool (bottom),  
 1498 based on 16S rRNA gene amplicon sequencing data.

1499

1500 At each time point, 10 pairwise comparisons between local communities (L vs. L) and 5 pairwise  
 1501 comparisons between local communities and the regional pool (L vs. R) were performed. Each  
 1502 comparison undergoes the criteria described above and the relative importance of each of the  
 1503 five ecological processes are calculated. The result is presented as Fig. S14.2.

1504 The assembly of communities was mainly governed by dispersal-related processes: dispersal  
 1505 limitation or homogenizing dispersal. 1) Homogenizing selection was low and never dominated at  
 1506 any time point, while 2) variable selection was only dominated at day 1, when communities  
 1507 adapted to the reactor conditions through complex biotic and abiotic interactions. 3) Dispersal  
 1508 limitation dominated the ecological processes during the Insular I phase, confirming our

1509 expectation that zero mass transfer supports stochastic process such as drift. 4) Homogenizing  
1510 dispersal was particular dominant at late  $RC_{50}$  and at  $RC_{80}$ , which fits our hypothesis that high  
1511 mass transfer synchronizes communities. The homogenizing dispersal was still prevalent into the  
1512 early Insular II phase, so we hypothesize that a historical effect of  $RC_{80}$  delayed the development  
1513 of insular communities which then became divergent in their structures. 5) Undominated process  
1514 (i.e., moderate dispersal and weak selection) governed community assembly during  $RC_{10}$  and  
1515  $RC_{50}$ , a period of transition from zero to high mass transfer.

1516

### 1517 [Infer Community Assembly Mechanisms by Phylogenetic-Bin-Based Null Model Analysis](#) 1518 [\(iCAMP\)](#)

1519 Ning et al. (30) modified the quantitative framework created by Stegen et al. (QPEN, 28, 29),  
1520 creating the iCAMP approach. iCAMP assesses the ecological processes at the level of taxa  
1521 lineages rather than the entire community. Ecological processes may differ between different  
1522 microbial groups in a community, e.g., within a community certain microbial groups are under  
1523 selection while others are under drift. The first step is phylogenetic binning, which divides taxa  
1524 into different groups ('bins') based on their phylogenetic relationships. The iCAMP calculates  
1525 phylogenetic diversities (i.e., phylogenetic turnover, using beta Net Relatedness Index,  $\beta NRI$ ) and  
1526 taxonomic  $\beta$ -diversities (i.e., ASV composition turnover, using modified Raup-Crick metric,  
1527  $\beta RC_{bray}$ ) between the same bins in pairwise samples, and the ecological process are determined  
1528 according to similar criteria as used by QPEN (the difference is that phylogenetic turnover is  
1529 calculated using  $\beta$ -mean-pairwise distance instead of  $\beta$ -mean-nearest taxon distance in QPEN).  
1530 The relative importance of the five studied ecological processes (HeS, HoS, DL, HD, DR) between  
1531 pairwise communities is represented by the mean relative abundance (across the pairwise  
1532 samples) of bins (each representing a sum of relative abundances of ASVs). At each time point,  
1533 10 pairwise comparisons between local communities (L vs. L) and 5 pairwise comparisons  
1534 between local communities and the regional pool (L vs. R) were performed and the relative  
1535 importance of each ecological process was visualized separately as points in the five panels of  
1536 Fig. S14.3.

1537

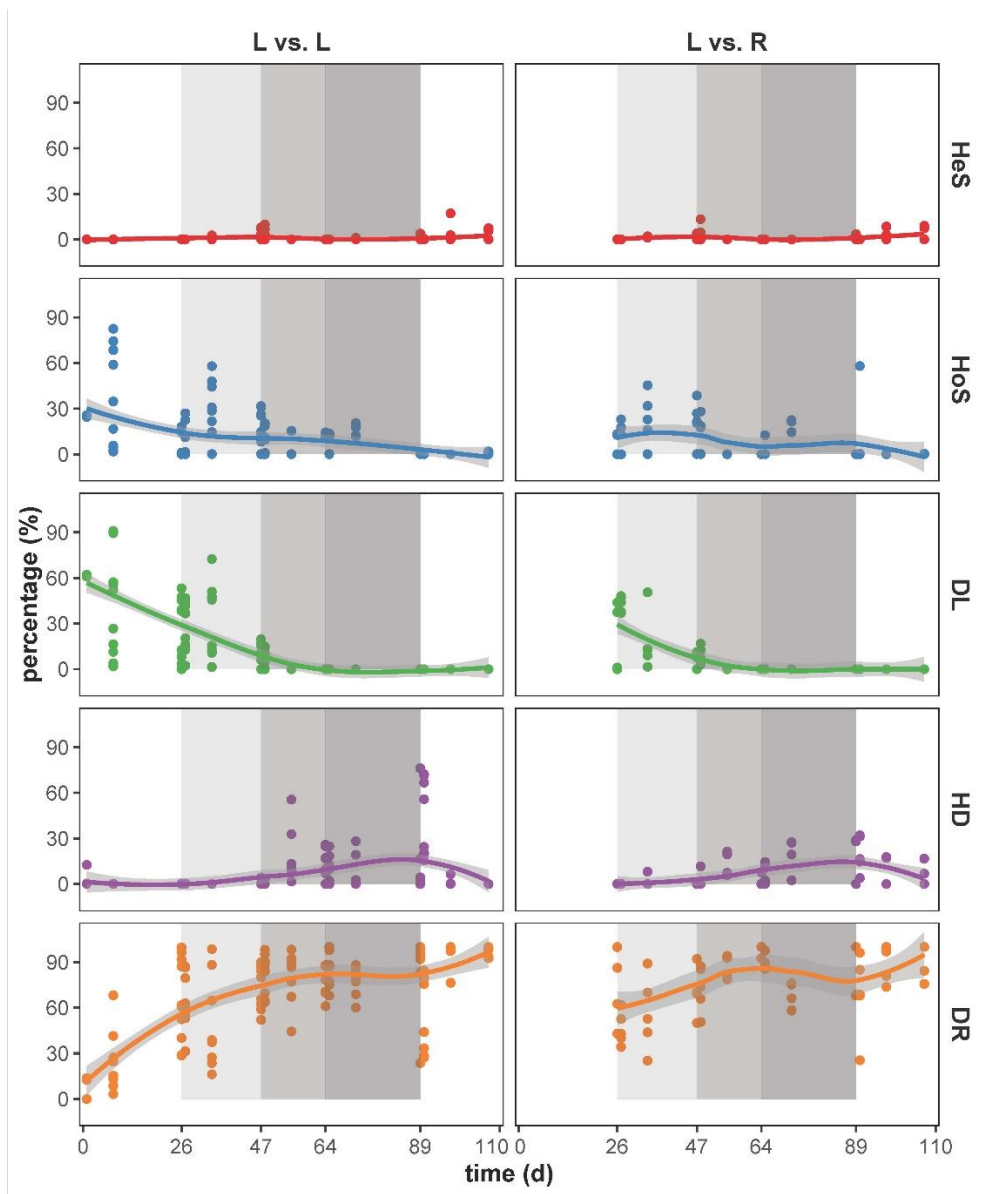

1538

1539

**Figure S14.3** The percentages of community assembly mechanisms over time compared between local communities (L vs. L, left panel) and between local communities and the regional pool (L vs. R, right panel).

1540

According to Ning et al. (30), a phylogenetic-bin-based null model analysis (iCAMP) was used based on

1541

16S rRNA gene amplicon sequencing data. HeS: heterogeneous selection; HoS: homogeneous selection;

1542

DL: dispersal limitation; HD: homogenizing dispersal; DR: drift, diversification, weak selection, and/or weak

1543

dispersal.

1544

1545

1546

Trends in the relative importance of the five ecological processes of community assembly

1547

analyzed by iCAMP over time largely confirmed the results of QPEN (Fig. S14.2), such as those

1548

associated with dispersal, including dispersal limitation (DL) and homogenizing dispersal (HD).

1549 Both heterogeneous selection (HeS) and homogeneous selection (HoS) were low after the  
1550 community adapted to continuous cultivation conditions.

1551  
1552 The three tools (QPEN, 28; NST, 27; and iCAMP, 30) all confirmed the results of our study that  
1553 mass transfer homogenized local communities and the regional pool and reduced stochastic  
1554 processes to as low as 6% (corresponding determinism = 94%). Similar to Stegen's method  
1555 QPEN, the values calculated with iCAMP indicated homogenizing dispersal (HD) and progressive  
1556 (decreasing) stochastic variation in phases 2 to 4 (27, Fig. S14.1). Selection was found to be  
1557 exceptionally low in phase 4 ( $RC_{80}$ ) by all three tools.

1558  
1559

## 1560 **References**

- 1561 1. Z. Liu *et al.*, Neutral mechanisms and niche differentiation in steady-state insular microbial  
1562 communities revealed by single cell analysis. *Environ Microbiol* **21**, 164-181 (2019).
- 1563 2. A. Cydzik-Kwiatkowska, D. Nosek, Biological release of phosphorus is more efficient from activated  
1564 than from aerobic granular sludge. *Sci Rep* **10**, 11076 (2020).
- 1565 3. N. Cichocki *et al.*, Bacterial mock communities as standards for reproducible cytometric microbiome  
1566 analysis. *Nat Protoc* **15**, 2788-2812 (2020).
- 1567 4. C. Koch, S. Günther, A.F. Desta, T. Hübschmann, S. Müller, Cytometric fingerprinting for analyzing  
1568 microbial intracommunity structure variation and identifying subcommunity function. *Nat Protoc* **8**,  
1569 190-202 (2013).
- 1570 5. S. Takahashi, J. Tomita, K. Nishioka, T. Hisada, M. Nishijima, Development of a prokaryotic  
1571 universal primer for simultaneous analysis of bacteria and archaea using next-generation  
1572 sequencing. *PLoS One* **9** e105592 (2014).
- 1573 6. D.P.R. Herlemann *et al.*, Transitions in bacterial communities along the 2000 km salinity gradient  
1574 of the Baltic Sea. *ISME J* **5**, 1571-1579 (2011).
- 1575 7. E. Bolyen *et al.*, Reproducible, interactive, scalable and extensible microbiome data science using  
1576 QIIME 2 (vol 37, pg 852, 2019). *Nat Biotechnol* **37**, 1091-1091 (2019).
- 1577 8. B.J. Callahan *et al.*, DADA2: High-resolution sample inference from Illumina amplicon data. *Nat*  
1578 *Methods* **13**, 581-583 (2016).
- 1579 9. C. Quast *et al.*, The SILVA ribosomal RNA gene database project: improved data processing and  
1580 web-based tools. *Nucleic Acids Res* **41**, D590-D596 (2013).
- 1581 10. S. McGinnis, T.L. Madden, BLAST: at the core of a powerful and diverse set of sequence analysis  
1582 tools. *Nucleic Acids Res* **32**, W20-W25 (2004).
- 1583 11. P.J. McMurdie, S. Holmes, phyloseq: an R package for reproducible interactive analysis and  
1584 graphics of microbiome census data. *PLoS One* **8**, e61217 (2013).
- 1585 12. Z. Liu *et al.*, Ecological stability properties of microbial communities assessed by flow cytometry.  
1586 *mSphere* **3** (2018).
- 1587 13. J. Oksanen *et al.*, Community ecology package. *R package version 2* (2013).
- 1588 14. Z. Liu, S. Müller, Bacterial community diversity dynamics highlight degrees of nestedness and  
1589 turnover patterns. *Cytometry A* **97**, 742-748 (2020).
- 1590 15. A. Baselga, Partitioning the turnover and nestedness components of beta diversity. *Glob Ecol*  
1591 *Biogeogr* **19**, 134-143 (2010).
- 1592 16. A. Baselga, The relationship between species replacement, dissimilarity derived from nestedness,  
1593 and nestedness. *Glob Ecol Biogeogr* **21**, 1223-1232 (2012).



- 1594 17. Q. Feng *et al.*, Treatment of shale gas fracturing wastewater using microbial fuel cells: Mixture of  
1595 aging landfill leachate and traditional aerobic sludge as catholyte. *J Clean Prod* **269**, 121776  
1596 (2020).
- 1597 18. B. Shao *et al.*, Enhanced treatment of shale gas fracturing waste fluid through plant-microbial  
1598 synergism. *Environ Sci Pollut Res Int* **28**, 29919–29930 (2021).
- 1599 19. P.L. Steyn *et al.*, Classification of heparinolytic bacteria into a new genus, *Pedobacter*, comprising  
1600 four species: *Pedobacter heparinus* comb. nov., *Pedobacter piscium* comb. nov., *Pedobacter*  
1601 *africanus* sp. nov. and *Pedobacter saltans* sp. nov. Proposal of the family *Sphingobacteriaceae*  
1602 fam. nov. *Int J Syst Bacteriol* **48**, 165-177 (1998).
- 1603 20. T.A. Pankratov, B.J. Tindall, W. Liesack, S.N. Dedysh, *Mucilaginibacter paludis* gen. nov., sp. nov.  
1604 and *Mucilaginibacter gracilis* sp. nov., pectin-, xylan- and laminarin-degrading members of the  
1605 family *Sphingobacteriaceae* from acidic *Sphagnum* peat bog. *Int J Syst Evol Micr* **57**, 2349–2354  
1606 (2007).
- 1607 21. S. Nagar *et al.*, Phylogenetic relationships and potential functional attributes of the genus  
1608 *Parapedobacter*: A member of family *Sphingobacteriaceae*. *Front Microbiol* **11**, 1725 (2020).
- 1609 22. O. Steenhoudt, J. Vanderleyden, *Azospirillum*, a free-living nitrogen-fixing bacterium closely  
1610 associated with grasses: genetic, biochemical and ecological aspects. *FEMS Microbiol Rev* **24**,  
1611 487-506 (2000).
- 1612 23. S. Müller, Modes of cytometric bacterial DNA pattern: a tool for pursuing growth. *Cell Proliferat* **40**,  
1613 621-639 (2007).
- 1614 24. F.E. Harrell, C. Dupont, Hmisc: harrell miscellaneous. *R package version 3* (2008).
- 1615 25. Y. Benjamini, Y. Hochberg, Controlling the false discovery rate - a practical and powerful approach  
1616 to multiple testing. *J R Stat Soc Ser B* **57**, 289-300 (1995).
- 1617 26. L. Wu *et al.*, Global diversity and biogeography of bacterial communities in wastewater treatment  
1618 plants. *Nat Microbiol* **4**, 1183–1195 (2019).
- 1619 27. D. Ning, Y. Deng, J. M. Tiedje, J. Zhou, A general framework for quantitatively assessing ecological  
1620 stochasticity. *Proc Natl Acad Sci USA* **116**, 16892-16898 (2019).
- 1621 28. J. C. Stegen *et al.*, Quantifying community assembly processes and identifying features that impose  
1622 them. *ISME J* **7**, 2069-2079 (2013).
- 1623 29. J. C. Stegen, X. Lin, J. K. Fredrickson, A. E. Konopka, Estimating and mapping ecological processes  
1624 influencing microbial community assembly. *Front Microbiol* **6**, 370 (2015).
- 1625 30. D. Ning *et al.*, A quantitative framework reveals ecological drivers of grassland soil microbial  
1626 community assembly in response to warming. *Nat Commun* **11**, 4717 (2020).
- 1627 31. S. Günther *et al.*, Species-sorting and mass-transfer paradigms control managed natural  
1628 metacommunities. *Environ Microbiol* **18**, 4862-4877 (2016).
- 1629 32. J. B. Losos, Phylogenetic niche conservatism, phylogenetic signal and the relationship between  
1630 phylogenetic relatedness and ecological similarity among species. *Ecol Lett* **11**, 995–1003 (2008).
- 1631
